# Supplementary material for: Palladium(ii)-catalyzed enantioselective intermolecular oxidative diarylation of internal enamides
Source: Royal Society of Chemistry journal article supplement (doi:10.1039/d2cc03202c), 2022-01-01

## Supporting Information

### **Palladium(II)-Catalyzed Enantioselective Intermolecular Oxidative Diarylation of Internal Enamides**

Tingting Xia, Yang Xi, Haojie Ding, Yetong Zhang, Ke Fang, Xianqing Wu, Jingping Qu, Yifeng Chen\*

Key Laboratory for Advanced Materials and Joint International Research Laboratory of Precision Chemistry and Molecular Engineering, Feringa Nobel Prize Scientist Joint Research Center, Frontiers Science Center for Materiobiology and Dynamic Chemistry, School of Chemistry and Molecular Engineering, East China University of Science and Technology, 130 Meilong Road, Shanghai, 200237 (China)

**E-mail:** [yifengchen@ecust.edu.cn](mailto:yifengchen@ecust.edu.cn)

## Table of Contents

|                                                                                                                         |     |
|-------------------------------------------------------------------------------------------------------------------------|-----|
| General Information.....                                                                                                | S3  |
| Experimental procedures and characterization data.....                                                                  | S4  |
| Experimental procedures and characterization data for enamide <b>1t</b> .....                                           | S4  |
| General Procedures for Pd(II)-Catalyzed Enantioselective Intermolecular Oxidative Diarylation of Internal Enamides..... | S4  |
| Characterization Data for Products.....                                                                                 | S5  |
| X-Ray Diffraction Analysis of Compound <b>3b</b> .....                                                                  | S31 |
| References.....                                                                                                         | S33 |
| NMR Spectrum.....                                                                                                       | S34 |

## General Information

All catalytic reactions were carried out using oven dried glassware and under oxygen atmosphere unless otherwise stated.  $\text{Ag}_2\text{CO}_3$  (CAS 534-16-7) was purchased from Bidepharm. 2,5-'Bu<sub>2</sub>BQ (CAS 7440-66-6) was purchased from D&B; DME (CAS 110-71-4) was purchased from from Adamas (99%, SafeDry, with molecular sieves, Water  $\leq$  50 ppm (by K.F.), SafeSeal);  $\text{Pd}(\text{OAc})_2$  (CAS 3375-31-3) was purchased from TCI. Reactions were monitored by thin-layer chromatography (TLC) carried out on 0.20 mm Huanghai silica gel plates (HSGF 254) using UV light as the visualizing agent, and an acidic solution of Phosphomolybdic Acid (PMA) with heat as the stains. All new compounds were characterized by means of <sup>1</sup>H NMR, <sup>13</sup>C NMR, <sup>19</sup>F NMR and HRMS. NMR spectra were recorded using a Bruker AVANCE III 400 MHz NMR spectrometer and can be found at the end of the paper. High-resolution mass spectra (HRMS) were recorded on a Q Exactive plus 4G mass spectrometer using ESI-Quadrupole-Orbitrap LC-MS. HPLC was performed on SHIMADZU LC-2030 Plus and SIL-20A. Optical rotations were recorded on digital automatic polarimeter (WZZ-2S). All <sup>1</sup>H NMR data are reported in  $\delta$  units, parts per million (ppm), and were calibrated relative to the signals for residual chloroform (7.26 ppm) in deuteriochloroform ( $\text{CDCl}_3$ ). All <sup>13</sup>C NMR data are reported in ppm relative to  $\text{CDCl}_3$  (77.16 ppm). <sup>19</sup>F NMR was recorded on a Bruker AVANCE III 400 NMR spectrometer ( $\text{CFCl}_3$  as an external standard and low field is positive) and were obtained with <sup>1</sup>H decoupling. The following abbreviations or combinations thereof were used to explain the multiplicities: s = singlet, d = doublet, t = triplet, q = quartet, bs = broad singlet, m = multiplet.

## Experimental procedures and characterization data

### Experimental procedures and characterization data for enamide 1t

Compounds **1a**,<sup>1</sup> **1j**,<sup>2</sup> **1k**,<sup>1</sup> **1l**,<sup>2</sup> **1m**,<sup>1</sup> **1n**,<sup>1</sup> **1o**,<sup>1</sup> **1p**,<sup>2</sup> **1q**,<sup>1</sup> **1r**,<sup>2</sup> **1s**,<sup>2</sup> **1u**<sup>3</sup>, **1v**<sup>4</sup> were synthesized according to the published procedures.

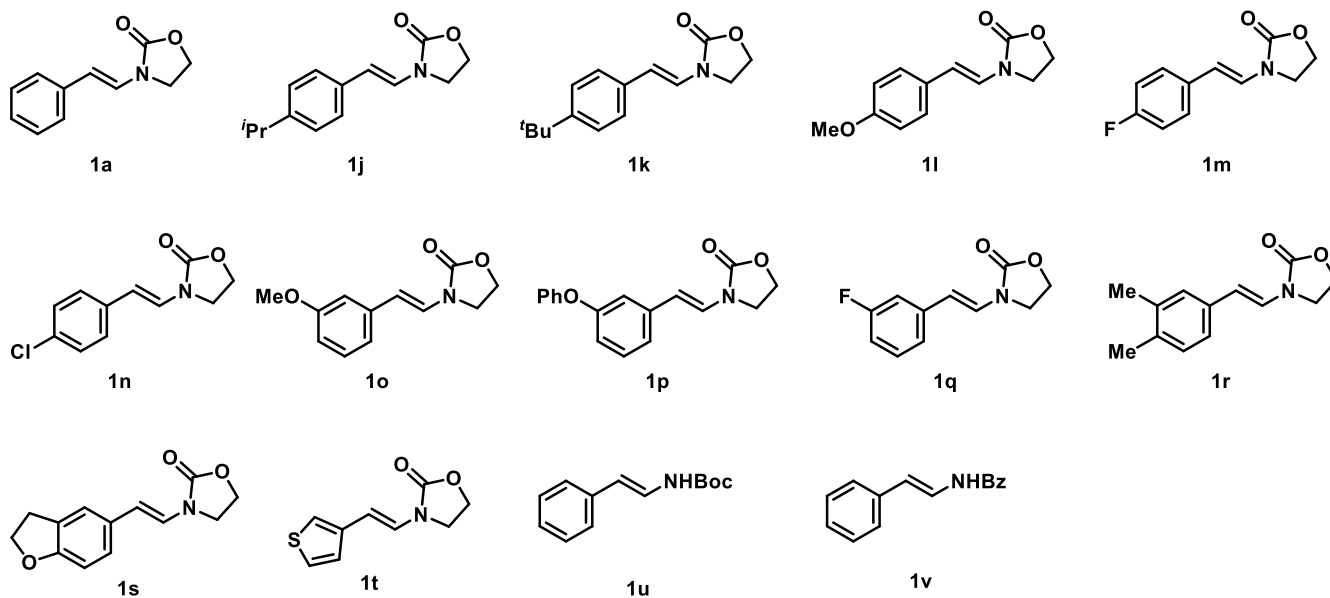

### Experimental procedure for the enamides **1t** synthesis

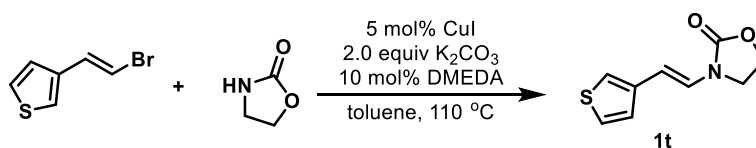

This procedure was performed according to the known literature<sup>5</sup>. Copper iodide (5 mol%), K<sub>2</sub>CO<sub>3</sub> (2 equiv) and the oxazolidin-2-one (1.5 equiv) are successively added in a tube and then dried by three successive vacuum-nitrogen cycles. Toluene was then added, followed by DMEDA (N,N'-dimethylethylenediamine, 10 mol%) and vinyl bromide<sup>6</sup> (1.0 equiv). The mixture is then heated at 110 °C overnight. When the starting materials were consumed, the reaction mixture was cooled to room temperature, diluted with EtOAc and filtered over silica. After concentration in vacuo the crude enamide is purified by flash chromatography on silica gel.

### Characterization data for enamide **1t**

#### (E)-3-(2-(thiophen-3-yl)vinyl)oxazolidin-2-one (**1t**)

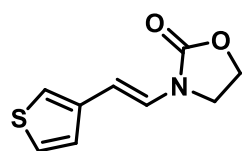

Experimental procedure was followed on 5.3 mmol scale and purification by flash column chromatography on silica gel to afford **1t** as a yellow solid (544.2 mg, 53%). R<sub>f</sub> = 0.53 (PE/Ea = 1/1);

<sup>1</sup>H NMR (400 MHz, CDCl<sub>3</sub>): δ 7.23 – 7.19 (m, 2H), 7.11 (d, *J* = 4.8 Hz, 1H), 6.99 (d, *J* = 2.8 Hz, 1H), 5.76 (d, *J* = 14.8 Hz, 1H), 4.44 (t, *J* = 8.4 Hz, 2H), 3.76 (t, *J* = 8.0 Hz, 2H);

<sup>13</sup>C NMR (100 MHz, CDCl<sub>3</sub>): δ 155.5, 137.7, 126.5, 124.6, 124.2, 120.2, 106.1, 62.4, 42.6.

HRMS (ESI): [M+H]<sup>+</sup> Calcd for C<sub>9</sub>H<sub>10</sub>NO<sub>2</sub>S<sup>+</sup>: 196.0427 found: 196.0428.

### General Procedures for Pd(II)-Catalyzed Enantioselective Intermolecular Oxidative Diarylation of Internal Enamides:

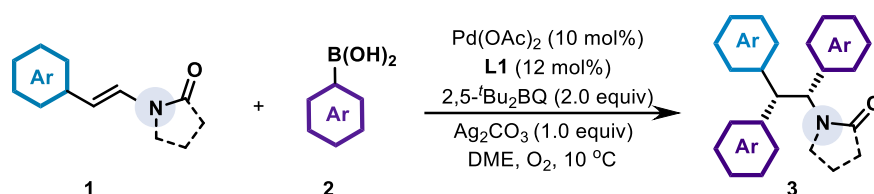

To an oven-dried 8 mL vial equipped with a magnetic stir bar was added Pd(OAc)<sub>2</sub> (10 mol%, 0.02 mmol, 4.5 mg), (*S*)-*i*-Pr-BiOx **L1** (12 mol %, 0.024 mmol, 5.4 mg) and DME (0.5 mL). The mixture was prestirred at room temperature for 5~10 min. Then enamide (1.0 equiv, 0.20 mmol), arylboronic acid (5.0 equiv, 1.0 mmol), 2,5-*t*Bu<sub>2</sub>BQ (2.0 equiv, 0.40 mmol, 88.1 mg), Ag<sub>2</sub>CO<sub>3</sub> (1.0 equiv, 0.20 mmol, 55.2 mg) and DME (0.5 mL) were subsequently added. The reaction mixture was purged with O<sub>2</sub> for 5-10 min and stirred at 10 or 25 °C for the required time. After the reaction completed, the reaction mixture was quenched with H<sub>2</sub>O and extracted with EA for three times. The combined organic phase was washed with brine and dried over anhydrous Na<sub>2</sub>SO<sub>4</sub>, filtered, and concentrated under reduced pressure by rotary evaporation. The desired product was purified by column chromatography on silica gel.

## Characterization Data for Products:

### 3-((1*R*,2*S*)-2-phenyl-1,2-di-*p*-tolylethyl)oxazolidin-2-one (**3a**)

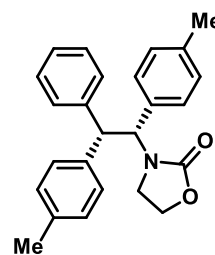

General procedure was followed on 0.2 mmol scale and purification by flash column chromatography on silica gel (PE/Et<sub>2</sub>O/CHCl<sub>3</sub> = 5/1/0.5) afforded **3a** as a white solid (62.6 mg, 84%). **R<sub>f</sub>** = 0.43 (PE/Et<sub>2</sub>O/CHCl<sub>3</sub> = 2/1/0.5);

**[α]<sub>D</sub><sup>23.3</sup>** = - 107.06 (c = 0.17, CH<sub>2</sub>Cl<sub>2</sub>);

**<sup>1</sup>H NMR** (400 MHz, CDCl<sub>3</sub>): 7.47 (d, *J* = 7.2 Hz, 2H), 7.33 – 7.29 (m, 4H), 7.20 (d, *J* = 7.2 Hz, 1H), 7.16 (d, *J* = 8.0 Hz, 2H), 7.07 (d, *J* = 8.0 Hz, 2H), 6.93 (d, *J* = 8.0 Hz, 2H), 5.89 (d, *J* = 12.4 Hz, 1H), 4.65 (d, *J* = 12.4 Hz, 1H), 4.00 (td, *J* = 8.4, 5.2 Hz, 1H), 3.81 (dt, *J* = 8.8, 8.4 Hz, 1H), 3.38 (td, *J* = 8.0, 4.8 Hz, 1H), 3.26 (dt, *J* = 8.8,

8.4 Hz, 1H), 2.26 (s, 3H), 2.16 (s, 3H);

**<sup>13</sup>C NMR** (100 MHz, CDCl<sub>3</sub>): δ 157.9, 142.0, 138.3, 137.7, 136.1, 134.1, 129.4, 129.4, 128.9, 128.3, 127.9, 127.6, 127.0, 61.9, 59.0, 52.2, 40.3, 21.2, 21.0.

**HRMS (ESI)**: [M+H]<sup>+</sup> Calcd for C<sub>25</sub>H<sub>26</sub>NO<sub>2</sub><sup>+</sup>: 372.1958; found: 372.1955.

**HPLC** (Chiralcel AD-H): *n*-Hexane/EtOH = 90/10, flow rate 1.0 mL/min, T = 40 °C, λ = 210 nm, t<sub>R</sub> = 13.707 min (major), t<sub>R</sub> = 11.999 min (minor); 97% ee.

<Chromatogram>

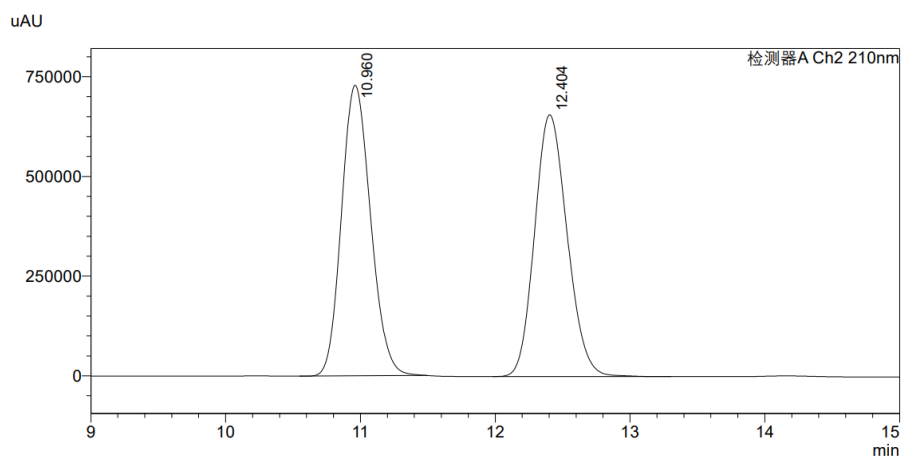

<Peak Table>

| 检测器A Ch2 210nm |           |          |         |        |      |      |
|----------------|-----------|----------|---------|--------|------|------|
| Peak#          | Ret. Time | Area     | Height  | Conc.  | Unit | Mark |
| 1              | 10.960    | 10952074 | 728723  | 49.820 |      | M    |
| 2              | 12.404    | 11031102 | 655742  | 50.180 |      | M    |
| 总计             |           | 21983176 | 1384464 |        |      |      |

<Chromatogram>

uAU

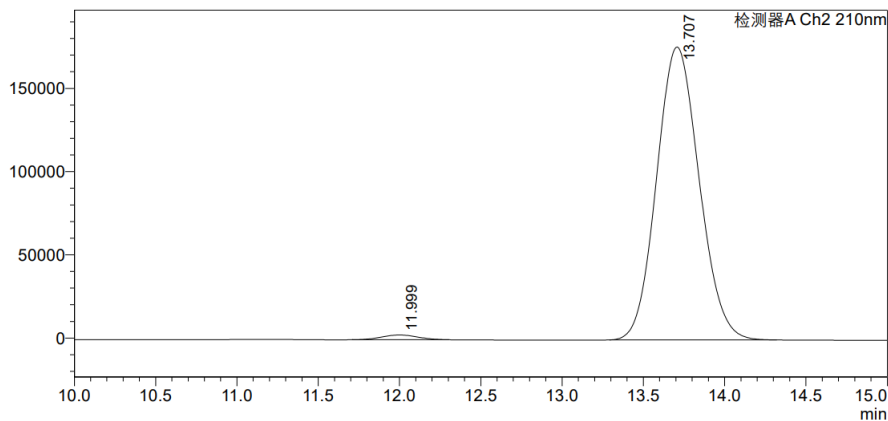

<Peak Table>

| 检测器A Ch2 210nm |           |         |        |        |      |      |
|----------------|-----------|---------|--------|--------|------|------|
| Peak#          | Ret. Time | Area    | Height | Conc.  | Unit | Mark |
| 1              | 11.999    | 44270   | 2868   | 1.363  |      | M    |
| 2              | 13.707    | 3203703 | 176023 | 98.637 |      | M    |
| 总计             |           | 3247972 | 178891 |        |      |      |

**3-((1R,2S)-1,2-bis(4-(tert-butyl)phenyl)-2-phenylethyl)oxazolidin-2-one (3b)**

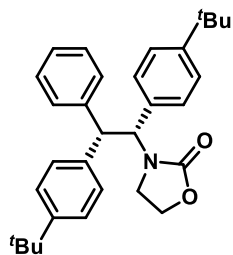

General procedure was followed on 0.2 mmol scale and purification by flash column chromatography on silica gel (PE/Et<sub>2</sub>O/DCM = 10/1/2) afforded **3b** as a white solid (68.1 mg, 75%). **R<sub>f</sub>** = 0.27 (PE/Et<sub>2</sub>O/DCM = 2/1/0.5);

**[α]<sub>D</sub><sup>23.3</sup>** = - 103.08 (c = 0.26, CH<sub>2</sub>Cl<sub>2</sub>);

**<sup>1</sup>H NMR** (400 MHz, CDCl<sub>3</sub>): 7.47 (d, *J* = 7.6 Hz, 2H), 7.31 – 7.29 (m, 4H), 7.25 (d, *J* = 6.4 Hz, 2H), 7.20 (d, *J* = 7.2 Hz, 1H), 7.18 – 7.11 (m, 4H), 5.88 (d, *J* = 12.4 Hz, 1H), 4.63 (d, *J* = 12.4 Hz, 1H), 4.02 (td, *J* = 8.8, 4.8 Hz, 1H), 3.78 (dt, *J* = 8.8, 8.4 Hz, 1H), 3.35 (td, *J* = 8.0, 5.2 Hz, 1H), 3.25 (dt, *J* = 8.8, 8.4 Hz, 1H), 1.25 (s,

9H), 1.17 (s, 9H);

**<sup>13</sup>C NMR** (100 MHz, CDCl<sub>3</sub>): δ 157.9, 150.7, 149.1, 142.2, 138.2, 134.1, 128.9, 128.0, 127.8, 127.6, 127.0, 125.6, 125.5, 61.8, 58.8, 52.2, 40.4, 34.6, 34.4, 31.4, 31.3.

**HRMS (ESI)**: [M+H]<sup>+</sup> Calcd for C<sub>31</sub>H<sub>38</sub>NO<sub>2</sub><sup>+</sup>: 456.2897; found: 456.2898.

**HPLC** (Chiralcel AD-H): *n*-Hexane/EtOH = 90/10, flow rate 1.0 mL/min, T = 40 °C, λ = 210 nm, *t<sub>R</sub>* = 5.641 min (major), *t<sub>R</sub>* = 6.088 min (minor); >99% ee.

<Chromatogram>

uV

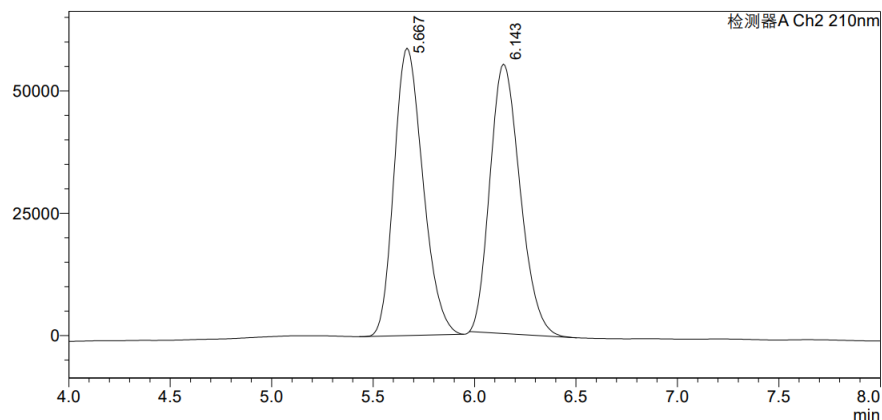

<Peak Table>

| 检测器A Ch2 210nm |           |         |        |        |      |      |
|----------------|-----------|---------|--------|--------|------|------|
| Peak#          | Ret. Time | Area    | Height | Conc.  | Unit | Mark |
| 1              | 5.667     | 583151  | 58735  | 50.568 |      | M    |
| 2              | 6.143     | 570057  | 55047  | 49.432 |      | M    |
| 总计             |           | 1153208 | 113782 |        |      |      |

<Chromatogram>

uAU

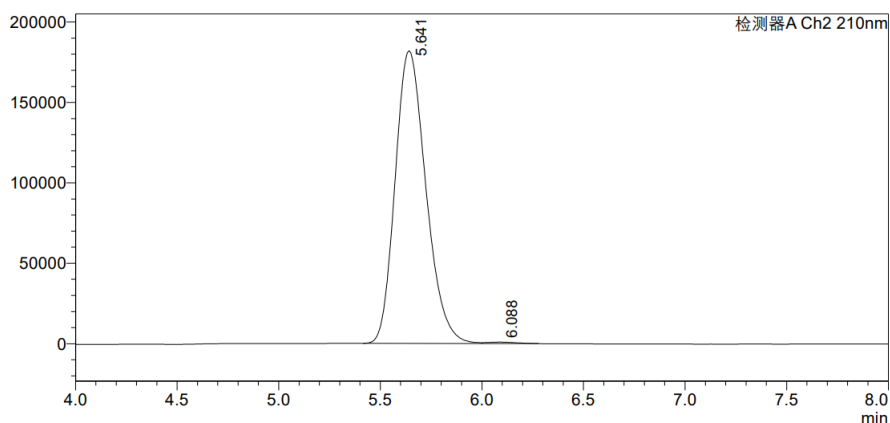

<Peak Table>

| 检测器A Ch2 210nm |           |         |        |        |      |      |
|----------------|-----------|---------|--------|--------|------|------|
| Peak#          | Ret. Time | Area    | Height | Conc.  | Unit | Mark |
| 1              | 5.641     | 1917957 | 181989 | 99.525 |      | M    |
| 2              | 6.088     | 9163    | 926    | 0.475  |      | V M  |
| 总计             |           | 1927120 | 182914 |        |      |      |

**3-((1R,2S)-1,2-bis(4-methoxyphenyl)-2-phenylethyl)oxazolidin-2-one (3c)**

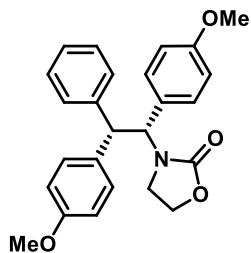

General procedure was followed on 0.2 mmol scale and purification by flash column chromatography on silica gel (PE/acetone/CHCl<sub>3</sub> = 8/1/0.5~6/1/0.5) afforded **3c** as a white solid (58.6 mg, 73%). **R<sub>f</sub>** = 0.42 (PE/acetone/CHCl<sub>3</sub> = 4/1/0.5);

**[α]<sub>D</sub><sup>23.3</sup>** = - 101.52 (c = 0.22, CH<sub>2</sub>Cl<sub>2</sub>);

**<sup>1</sup>H NMR** (400 MHz, CDCl<sub>3</sub>): 7.45 (d, *J* = 7.2 Hz, 2H), 7.33 – 7.29 (m, 4H), 7.19 (t, *J* = 7.2 Hz, 1H), 7.15 (d, *J* = 8.8 Hz, 2H), 6.78 (d, *J* = 8.8 Hz, 2H), 6.66 (d, *J* = 8.8 Hz, 2H), 5.81 (d, *J* = 12.4 Hz, 1H), 4.59 (d, *J* = 12.4 Hz, 1H), 4.02 (td, *J* = 8.8, 5.2 Hz, 1H), 3.82 (dt, *J* = 8.8, 8.4 Hz, 1H), 3.74 (s, 3H), 3.65 (s, 3H), 3.38 (td, *J* = 8.0, 4.8 Hz, 1H), 3.27 (dt, *J* = 8.8, 8.4 Hz, 1H);

$^{13}\text{C}$  NMR (100 MHz,  $\text{CDCl}_3$ ):  $\delta$  159.1, 158.0, 157.9, 142.1, 133.5, 129.6, 129.3, 129.0, 128.9, 127.6, 127.0, 114.1, 114.0, 61.9, 58.9, 55.3, 55.1, 52.0, 40.4.

HRMS (ESI):  $[\text{M}+\text{H}]^+$  Calcd for  $\text{C}_{25}\text{H}_{26}\text{NO}_4^+$ : 404.1856; found: 404.1859.

HPLC (Chiralcel OD-H): *n*-Hexane/EtOH = 90/10, flow rate 1.0 mL/min,  $T = 40\text{ }^\circ\text{C}$ ,  $\lambda = 235\text{ nm}$ ,  $t_{\text{R}} = 14.136\text{ min}$  (major),  $t_{\text{R}} = 12.334\text{ min}$  (minor); 94% ee.

<Chromatogram>

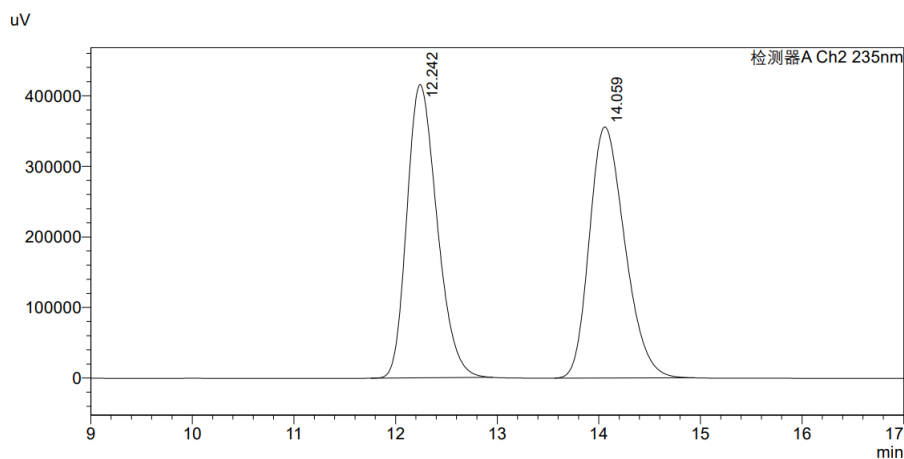

<Peak Table>

| 检测器A Ch2 235nm |           |          |        |        |      |      |
|----------------|-----------|----------|--------|--------|------|------|
| Peak#          | Ret. Time | Area     | Height | Conc.  | Unit | Mark |
| 1              | 12.242    | 8584128  | 415634 | 49.831 |      | M    |
| 2              | 14.059    | 8642358  | 355986 | 50.169 |      | M    |
| 总计             |           | 17226486 | 771620 |        |      |      |

<Chromatogram>

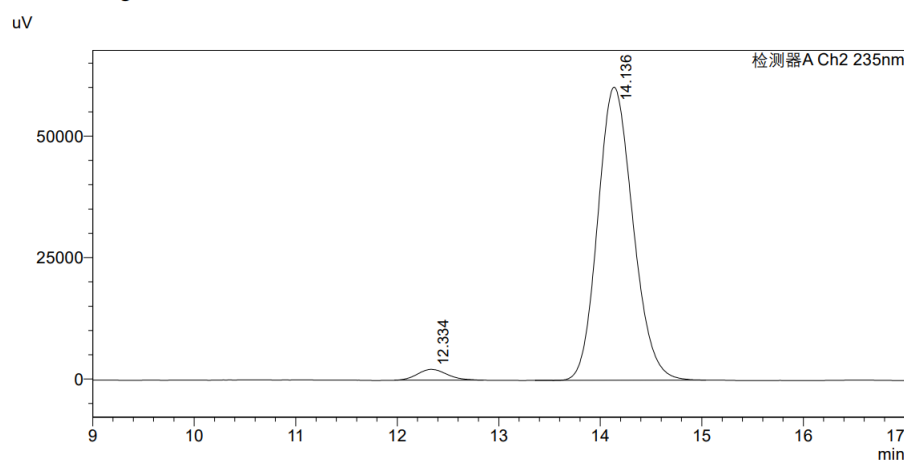

<Peak Table>

| 检测器A Ch2 235nm |           |         |        |        |      |      |
|----------------|-----------|---------|--------|--------|------|------|
| Peak#          | Ret. Time | Area    | Height | Conc.  | Unit | Mark |
| 1              | 12.334    | 45201   | 2219   | 3.018  |      | M    |
| 2              | 14.136    | 1452379 | 60303  | 96.982 |      | M    |
| 总计             |           | 1497580 | 62522  |        |      |      |

### 3-((1*R*,2*S*)-2-phenyl-1,2-bis(4-(trimethylsilyl)phenyl)ethyl)oxazolidin-2-one (3d)

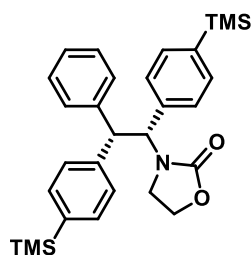

General procedure was followed on 0.2 mmol scale and purification by flash column chromatography on silica gel (PE/Et<sub>2</sub>O/DCM = 10/1/1~5/1/1) afforded **3d** as a white solid (58.8 mg, 60%).  $R_f = 0.40$  (PE/Et<sub>2</sub>O/DCM = 4/1/1);

$[\alpha]_{\text{D}}^{23.3} = -98.75$  ( $c = 0.16$ ,  $\text{CH}_2\text{Cl}_2$ );



**<sup>1</sup>H NMR** (400 MHz, CDCl<sub>3</sub>): 7.49 (d, *J* = 7.6 Hz, 2H), 7.41 (m, 4H), 7.33 (t, *J* = 7.6 Hz, 2H), 7.29 – 7.28 (m, 4H), 7.22 (t, *J* = 7.4 Hz, 1H), 5.96 (d, *J* = 12.4 Hz, 1H), 4.70 (d, *J* = 12.4 Hz, 1H), 4.03 (td, *J* = 8.8, 4.8 Hz, 1H), 3.81 (dt, *J* = 8.8, 8.4 Hz, 1H), 3.39 (td, *J* = 8.4, 5.2 Hz, 1H), 3.26 (dt, *J* = 8.8, 8.4 Hz, 1H), 0.23 (s, 9H), 0.16 (s, 9H);

**<sup>13</sup>C NMR** (100 MHz, CDCl<sub>3</sub>): δ 157.9, 141.8, 141.6, 140.3, 138.4, 137.4, 133.8, 133.7, 128.9, 127.8, 127.7, 127.4, 127.1, 61.9, 58.9, 52.4, 40.3, -1.1.

**HRMS (ESI):** [M+H]<sup>+</sup> Calcd for C<sub>29</sub>H<sub>38</sub>NO<sub>2</sub>Si<sub>2</sub><sup>+</sup>: 488.2436; found: 488.2435.

**HPLC** (Chiralcel AD-H): *n*-Hexane/*i*-PrOH = 90/10, flow rate 1.0 mL/min, T = 40 °C, λ = 235 nm, t<sub>R</sub> = 4.347 min (major), t<sub>R</sub> = 4.845 min (minor); 95% ee.

<Chromatogram>

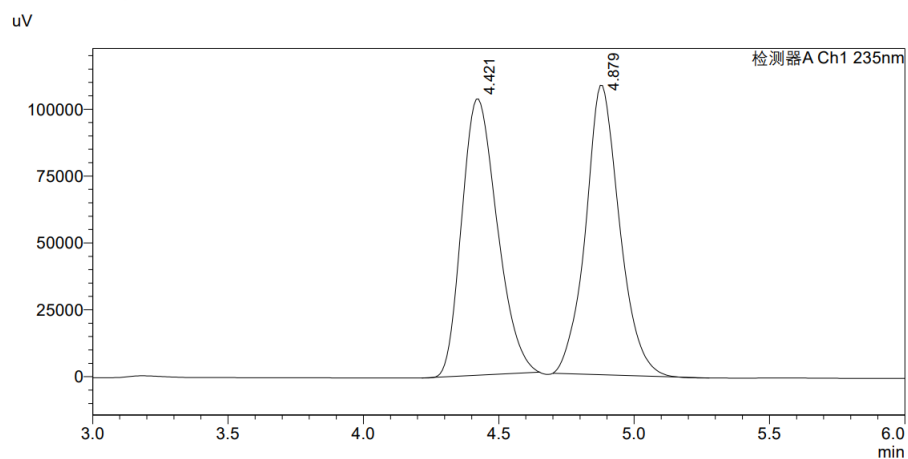

<Peak Table>

| 检测器A Ch1 235nm |           |         |        |        |      |      |
|----------------|-----------|---------|--------|--------|------|------|
| Peak#          | Ret. Time | Area    | Height | Conc.  | Unit | Mark |
| 1              | 4.421     | 940991  | 103279 | 49.881 |      | M    |
| 2              | 4.879     | 945484  | 108186 | 50.119 |      | M    |
| 总计             |           | 1886475 | 211466 |        |      |      |

<Chromatogram>

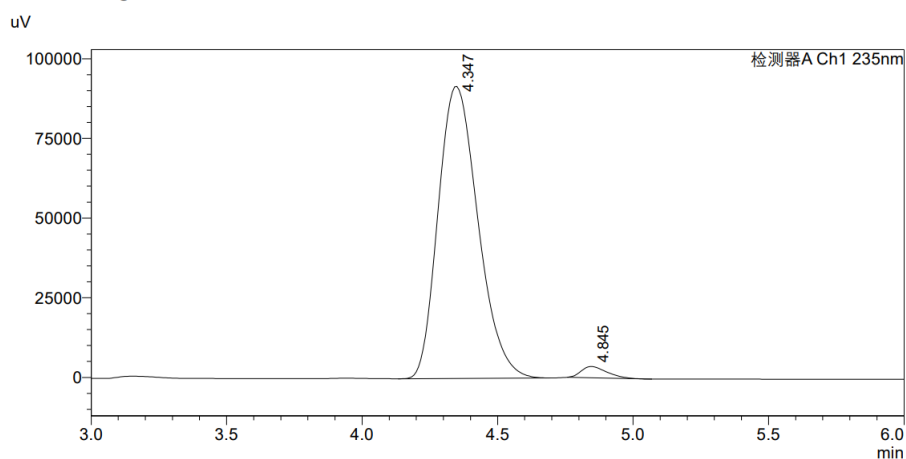

<Peak Table>

| 检测器A Ch1 235nm |           |        |        |        |      |      |
|----------------|-----------|--------|--------|--------|------|------|
| Peak#          | Ret. Time | Area   | Height | Conc.  | Unit | Mark |
| 1              | 4.347     | 938946 | 91669  | 97.601 |      | M    |
| 2              | 4.845     | 23082  | 3518   | 2.399  |      | M    |
| 总计             |           | 962029 | 95187  |        |      |      |

**3-((1R,2S)-1,2-bis(4-fluorophenyl)-2-phenylethyl)oxazolidin-2-one (3e)**

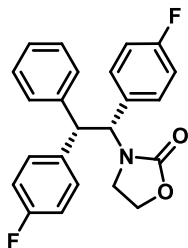

General procedure was followed on 0.2 mmol scale and purification by flash column chromatography on silica gel (PE/acetone/ $\text{CHCl}_3 = 10/1/1 \sim 8/1/1$ ) afforded **3e** as a white solid (29.4 mg, 39%).  $R_f = 0.20$  (PE/acetone/ $\text{CHCl}_3 = 8/1/1$ );

$[\alpha]_D^{23.3} = -88.89$  ( $c = 0.15$ ,  $\text{CH}_2\text{Cl}_2$ );

$^1\text{H NMR}$  (400 MHz,  $\text{CDCl}_3$ ): 7.44 (d,  $J = 7.2$  Hz, 2H), 7.36 – 7.32 (m, 4H), 7.23 (t,  $J = 7.6$  Hz, 1H), 7.19 – 7.16 (m, 2H), 6.95 (t,  $J = 8.4$  Hz, 2H), 6.82 (t,  $J = 8.8$  Hz, 2H), 5.80 (d,  $J = 12.8$  Hz, 1H), 4.64 (d,  $J = 12.4$  Hz, 1H), 4.06 (td,  $J = 8.8, 5.2$  Hz, 1H), 3.86 (dt,  $J = 8.8, 8.4$  Hz, 1H), 3.40 (td,  $J = 8.0, 5.2$  Hz, 1H), 3.30 (dt,  $J = 8.8, 8.4$  Hz, 1H)

$^{13}\text{C NMR}$  (100 MHz,  $\text{CDCl}_3$ ):  $\delta$  162.3 (d,  $J_{C-F} = 245.9$  Hz), 161.4 (d,  $J_{C-F} = 244.4$  Hz), 157.9, 141.1, 136.9 (d,  $J_{C-F} = 3.5$  Hz), 132.8 (d,  $J_{C-F} = 3.4$  Hz), 130.0 (d,  $J_{C-F} = 8.0$  Hz), 129.0 (d,  $J_{C-F} = 8.0$  Hz), 129.1, 127.6, 127.4, 115.8 (d,  $J_{C-F} = 21.3$  Hz), 115.7 (d,  $J_{C-F} = 21.3$  Hz), 62.0, 59.0, 52.2, 40.5.

$^{19}\text{F NMR}$  (376 MHz,  $\text{CDCl}_3$ ):  $\delta$  -113.5, -115.8;

**HRMS (ESI)**:  $[\text{M}+\text{H}]^+$  Calcd for  $\text{C}_{23}\text{H}_{20}\text{F}_2\text{NO}_2^+$ : 380.1457; found: 380.1465.

**HPLC** (Chiralcel OD-H): *n*-Hexane/*i*-PrOH = 90/10, flow rate 1.0 mL/min,  $T = 40$  °C,  $\lambda = 210$  nm,  $t_R = 11.385$  min (major),  $t_R = 10.440$  min (minor); 98% ee.

<Chromatogram>

uV

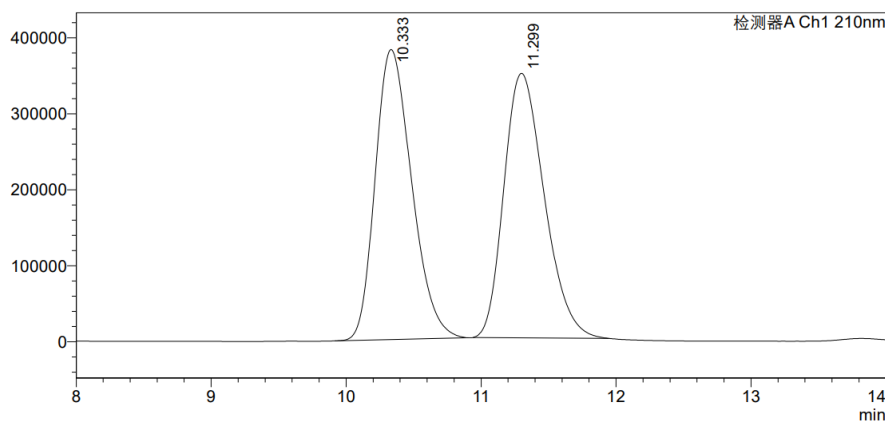

<Peak Table>

检测器A Ch1 210nm

| Peak# | Ret. Time | Area     | Height | Conc.  | Unit | Mark |
|-------|-----------|----------|--------|--------|------|------|
| 1     | 10.333    | 7180475  | 381864 | 49.809 |      | M    |
| 2     | 11.299    | 7235614  | 348092 | 50.191 |      | M    |
| 总计    |           | 14416089 | 729956 |        |      |      |

<Chromatogram>

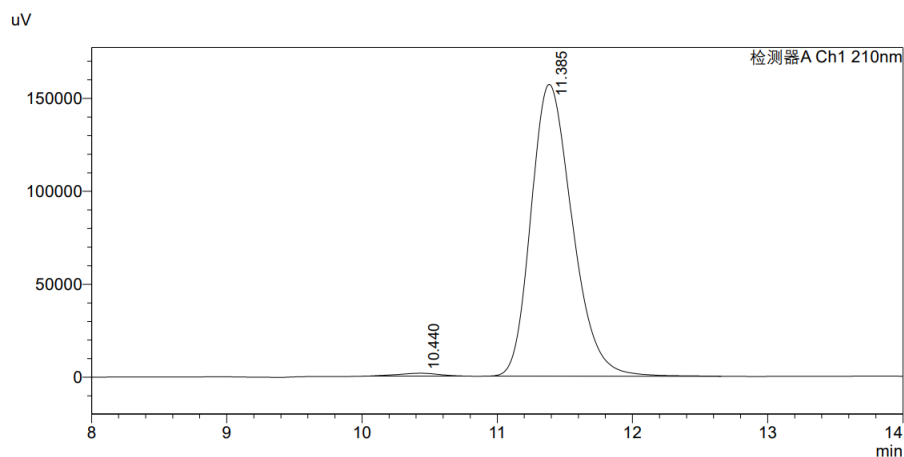

<Peak Table>

| Peak# | Ret. Time | Area    | Height | Conc.  | Unit | Mark |
|-------|-----------|---------|--------|--------|------|------|
| 1     | 10.440    | 33921   | 1554   | 1.008  |      | M    |
| 2     | 11.385    | 3331230 | 157031 | 98.992 |      | M    |
| 总计    |           | 3365151 | 158585 |        |      |      |

**3-((1R,2S)-1,2-bis(3-chloro-4-methoxyphenyl)-2-phenylethyl)oxazolidin-2-one (3f)**

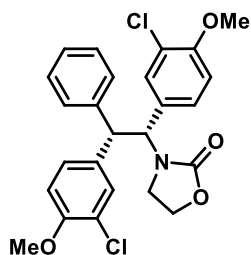

General procedure was followed on 0.2 mmol scale and purification by flash column chromatography on silica gel (PE/Et<sub>2</sub>O/DCM = 4/1/1~3/1/1) afforded **3f** as a white solid (63.1 mg, 67%). **R<sub>f</sub>** = 0.16 (PE/Et<sub>2</sub>O/CHCl<sub>3</sub> = 2/1/0.5);

**[α]<sub>D</sub><sup>23.3</sup>** = - 125.42 (c = 0.16, CH<sub>2</sub>Cl<sub>2</sub>);

**<sup>1</sup>H NMR** (400 MHz, CDCl<sub>3</sub>): 7.43 – 7.40 (m, 3H), 7.33 (t, *J* = 7.6 Hz, 2H), 7.24 – 7.20 (m, 3H), 7.09 (dd, *J* = 8.4, 2.0 Hz, 1H), 6.80 (d, *J* = 8.4 Hz, 1H), 6.69 (d, *J* = 8.8 Hz, 1H), 5.73 (d, *J* = 12.8 Hz, 1H), 4.53 (d, *J* = 12.8 Hz, 1H), 4.05 (td, *J* = 8.8, 5.2 Hz, 1H), 3.87 – 3.81 (m, 4H), 3.76 (s, 3H), 3.36 (td, *J* = 8.4, 5.2 Hz, 1H), 3.28 (dt, *J* = 8.4, 8.4 Hz, 1H);

**<sup>13</sup>C NMR** (100 MHz, CDCl<sub>3</sub>): δ 157.8, 154.7, 153.6, 141.0, 134.2, 129.9, 129.9, 129.7, 129.1, 128.1, 127.5, 127.4, 127.0, 122.6, 122.5, 112.3, 112.2, 61.9, 58.5, 56.2, 56.1, 51.6, 40.4.

**HRMS (ESI)**: [M-Cl+Na]<sup>+</sup> Calcd for C<sub>25</sub>H<sub>23</sub>ClNO<sub>4</sub>Na<sup>+</sup>: 459.1208; found: 459.1214.

**HPLC** (Chiralcel OD-H): *n*-Hexane/*i*-PrOH = 90/10, flow rate 1.0 mL/min, T = 40 °C, λ = 235 nm, *t<sub>R</sub>* = 25.922 min (major), *t<sub>R</sub>* = 23.155 min (minor); 98% ee.

<Chromatogram>

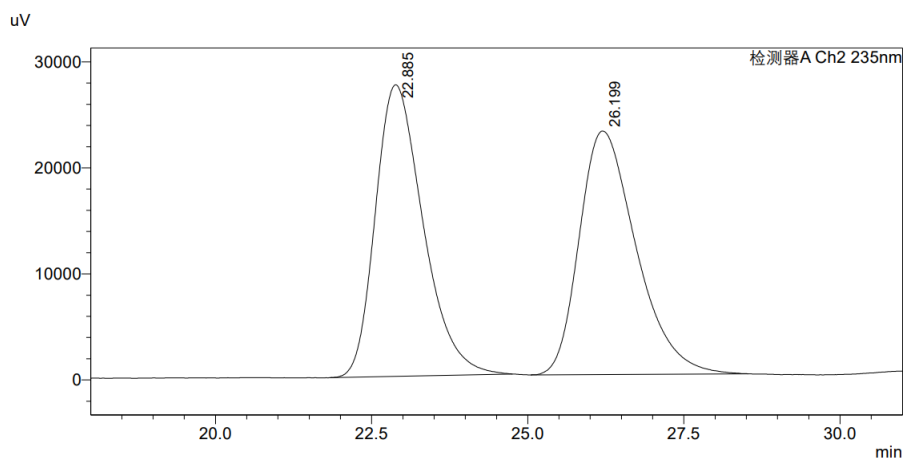

<Peak Table>

| 检测器A Ch2 235nm |           |         |        |        |      |      |
|----------------|-----------|---------|--------|--------|------|------|
| Peak#          | Ret. Time | Area    | Height | Conc.  | Unit | Mark |
| 1              | 22.885    | 1462228 | 27496  | 50.117 |      | M    |
| 2              | 26.199    | 1455411 | 22965  | 49.883 |      | M    |
| 总计             |           | 2917640 | 50461  |        |      |      |

<Chromatogram>

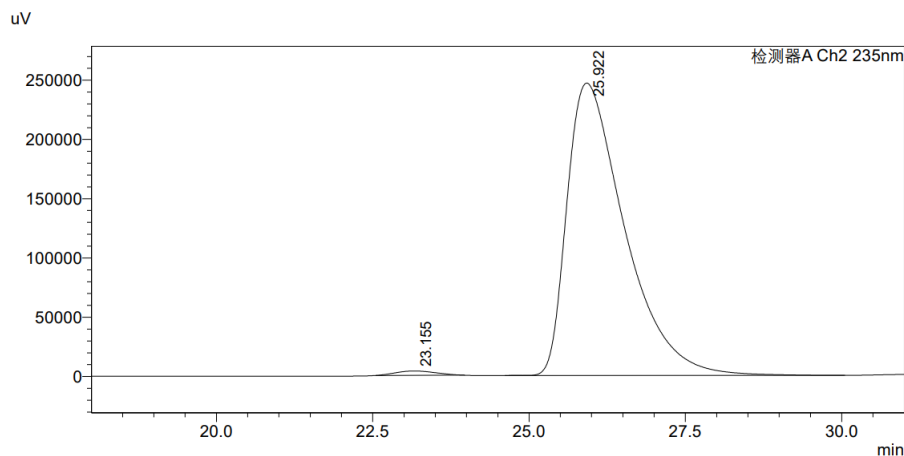

<Peak Table>

| 检测器A Ch2 235nm |           |          |        |        |      |      |
|----------------|-----------|----------|--------|--------|------|------|
| Peak#          | Ret. Time | Area     | Height | Conc.  | Unit | Mark |
| 1              | 23.155    | 163519   | 3672   | 1.020  |      | M    |
| 2              | 25.922    | 15872120 | 246740 | 98.980 |      | M    |
| 总计             |           | 16035640 | 250412 |        |      |      |

**3-((1R,2S)-1,2-bis(3-butoxyphenyl)-2-phenylethyl)oxazolidin-2-one (3g)**

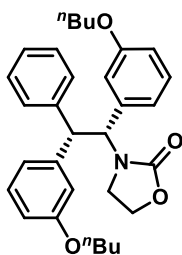

General procedure was followed on 0.2 mmol scale and purification by flash column chromatography on silica gel (PE/Et<sub>2</sub>O/DCM = 8/1/1~5/1/1) afforded **3g** as a white solid (49.2 mg, 50%). *R<sub>f</sub>* = 0.23 (PE/Et<sub>2</sub>O/DCM = 4/1/1);

$[\alpha]_D^{23.3} = -87.45$  (c = 0.17, CH<sub>2</sub>Cl<sub>2</sub>);

<sup>1</sup>H NMR (400 MHz, CDCl<sub>3</sub>): 7.47 (d, *J* = 7.6 Hz, 2H), 7.31 (t, *J* = 7.6 Hz, 2H), 7.20 (t, *J* = 7.2 Hz, 1H), 7.15 (t, *J* = 7.6 Hz, 1H), 7.02 (t, *J* = 8.0 Hz, 1H), 6.96 (d, *J* = 7.6 Hz, 1H), 6.93 (bs, 1H), 6.84 (d, *J* = 8.0 Hz, 1H), 6.80 (bs, 1H), 6.73 (dd, *J* = 8.0, 2.4 Hz, 1H), 6.56 (dd, *J* = 8.0, 2.4 Hz, 1H), 5.85 (d, *J* = 12.4 Hz, 1H), 4.61 (d, *J* = 12.4 Hz, 1H),

4.03 (td, *J* = 9.2, 5.2 Hz, 1H), 3.88 (t, *J* = 6.4 Hz, 2H), 3.85 – 3.79 (m, 3H), 3.38 (td, *J* = 8.4, 5.2 Hz, 1H), 3.31 (dt, *J* = 8.8, 8.4 Hz, 1H), 1.75 – 1.64 (m, 4H), 1.51 – 1.38 (m, 4H), 0.95 (dt, *J* = 10.0, 7.6 Hz, 6H);

<sup>13</sup>C NMR (100 MHz, CDCl<sub>3</sub>): δ 159.4, 159.2, 157.9, 142.7, 141.5, 138.5, 129.6, 129.6, 129.0, 127.7, 127.2, 120.4, 120.3, 114.9, 114.6, 114.0, 112.5, 67.8, 67.6, 61.9, 59.2, 52.6, 40.5, 31.4, 19.4, 19.3, 14.0.

**HRMS (ESI):** [M+Na]<sup>+</sup> Calcd for C<sub>31</sub>H<sub>37</sub>NO<sub>4</sub>Na<sup>+</sup>: 510.2615; found: 510.2626

**HPLC** (Chiralcel AD-H): *n*-Hexane/*i*-PrOH = 90/10, flow rate 1.0 mL/min, T = 40 °C, λ = 210 nm, *t<sub>R</sub>* = 7.707 min (major), *t<sub>R</sub>* = 8.658 min (minor); >99% ee.

<Chromatogram>

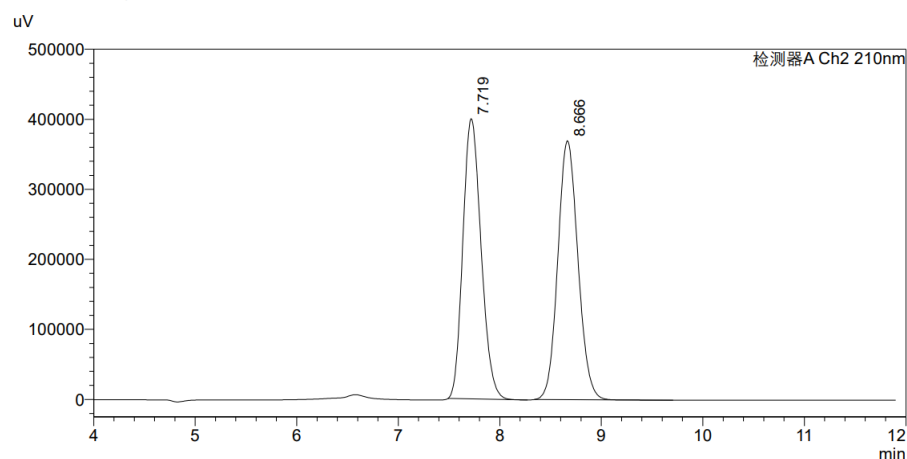

<Peak Table>

| 检测器A Ch2 210nm |           |          |        |        |      |      |
|----------------|-----------|----------|--------|--------|------|------|
| Peak#          | Ret. Time | Area     | Height | Conc.  | Unit | Mark |
| 1              | 7.719     | 4992977  | 399916 | 49.508 |      | M    |
| 2              | 8.666     | 5092234  | 369786 | 50.492 |      | M    |
| 总计             |           | 10085211 | 769702 |        |      |      |

<Chromatogram>

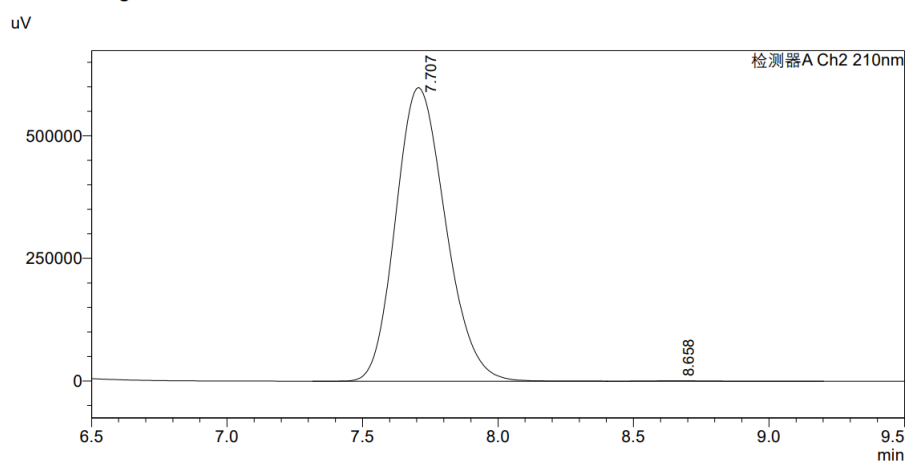

<Peak Table>

| 检测器A Ch2 210nm |           |         |        |        |      |      |
|----------------|-----------|---------|--------|--------|------|------|
| Peak#          | Ret. Time | Area    | Height | Conc.  | Unit | Mark |
| 1              | 7.707     | 7683431 | 599057 | 99.873 |      | M    |
| 2              | 8.658     | 9757    | 790    | 0.127  |      | M    |
| 总计             |           | 7693188 | 599846 |        |      |      |

**3-((1*R*,2*S*)-2-phenyl-1,2-di-*o*-tolylethyl)oxazolidin-2-one (3h)**

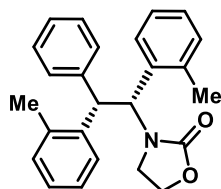

General procedure was followed on 0.2 mmol scale and purification by flash column chromatography on silica gel (PE/Et<sub>2</sub>O/CHCl<sub>3</sub> = 10/1/0.5~5/1/0.5) afforded **3h** as a white solid (47.5 mg, 64%). **R<sub>f</sub>** = 0.49 (PE/acetone/CHCl<sub>3</sub> = 5/1/0.5);

**[α]<sub>D</sub><sup>23.3</sup>** = -297.50 (c = 0.16, CH<sub>2</sub>Cl<sub>2</sub>);

**<sup>1</sup>H NMR** (400 MHz, CDCl<sub>3</sub>): 7.45 (d, *J* = 7.2 Hz, 2H), 7.37 (d, *J* = 7.6 Hz, 1H), 7.31 (t, *J* = 7.2 Hz, 2H), 7.23 – 7.20 (m, 2H), 7.14 (d, *J* = 6.8 Hz, 1H), 7.11 – 7.03 (m, 3H), 7.00 – 6.94 (m, 2H), 6.12 (d, *J* = 12.0 Hz, 1H), 4.95 (d, *J* = 12.4 Hz, 1H), 4.06 (td, *J* = 8.4, 5.6 Hz, 1H), 3.95 (dt, *J* = 8.8, 8.4 Hz, 1H), 3.61 (td, *J* = 8.8, 5.6 Hz, 1H), 3.16 (dt, *J* = 8.8, 8.4 Hz, 1H), 2.51 (s, 3H), 2.36 (s, 3H);

**<sup>13</sup>C NMR** (100 MHz, CDCl<sub>3</sub>): δ 157.4, 140.5, 139.2, 137.8, 135.8, 135.3, 131.4, 130.8, 128.7, 127.8, 127.3, 126.5, 126.5, 126.5, 126.3, 125.6, 61.8, 56.1, 47.3, 40.8, 20.3, 20.2.

**HRMS (ESI):** [M+H]<sup>+</sup> Calcd for C<sub>25</sub>H<sub>26</sub>NO<sub>2</sub><sup>+</sup>: 372.1958; found: 372.1958.

**HPLC** (Chiralcel AD-H): *n*-Hexane/*i*-PrOH = 90/10, flow rate 1.0 mL/min, T = 40 °C,  $\lambda$  = 210 nm,  $t_R$  = 10.339 min (major),  $t_R$  = 8.998 min (minor); 71% ee.

<Chromatogram>

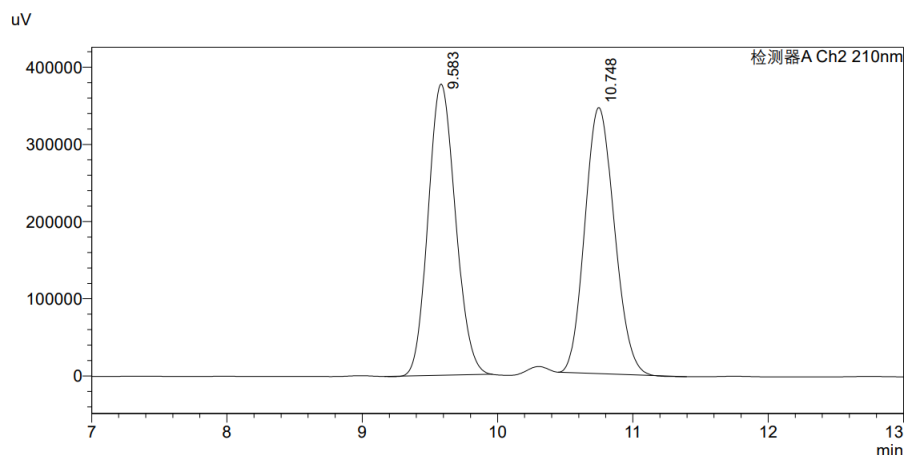

<Peak Table>

| 检测器A Ch2 210nm |           |          |        |        |      |      |
|----------------|-----------|----------|--------|--------|------|------|
| Peak#          | Ret. Time | Area     | Height | Conc.  | Unit | Mark |
| 1              | 9.583     | 5307150  | 377433 | 50.333 |      | M    |
| 2              | 10.748    | 5237009  | 344787 | 49.667 |      | M    |
| 总计             |           | 10544159 | 722220 |        |      |      |

<Chromatogram>

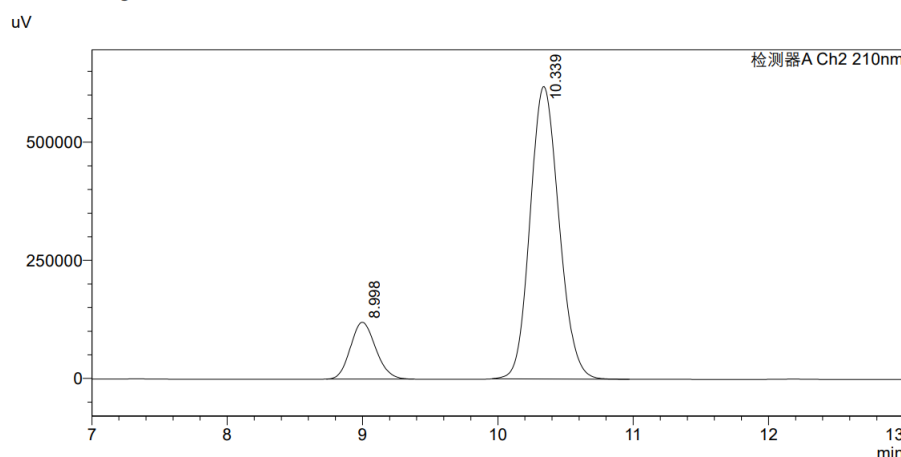

<Peak Table>

| 检测器A Ch2 210nm |           |          |        |        |      |      |
|----------------|-----------|----------|--------|--------|------|------|
| Peak#          | Ret. Time | Area     | Height | Conc.  | Unit | Mark |
| 1              | 8.998     | 1563597  | 120311 | 14.526 |      | M    |
| 2              | 10.339    | 9200170  | 618857 | 85.474 |      | M    |
| 总计             |           | 10763767 | 739168 |        |      |      |

### 3-((1R,2S)-1,2-bis(2-methoxyphenyl)-2-phenylethyl)oxazolidin-2-one (**3i**)

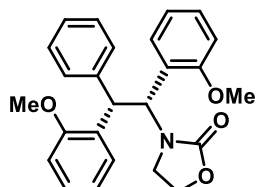

General procedure was followed on 0.2 mmol scale and purification by flash column chromatography on silica gel (PE/acetone/CHCl<sub>3</sub> = 10/1/0.5~4/1/0.5) afforded **3i** as a white solid (47.1 mg, 58%);

$[\alpha]_D^{29.1} = -10.91$  (c = 0.22, CHCl<sub>2</sub>);

<sup>1</sup>H NMR (400 MHz, CDCl<sub>3</sub>): 7.53 (d, *J* = 7.2 Hz, 2H), 7.36 – 7.33 (m, 2H), 7.29 (d, *J* = 7.2 Hz, 2H), 7.19 – 7.12 (m, 2H), 6.99 (td, *J* = 7.8, 1.2 Hz, 1H), 6.81 – 6.03 (m, 3H), 6.66 (d, *J* = 8.0 Hz, 1H), 6.24 (d, *J* = 12.8 Hz, 1H), 5.40 (d, *J* = 12.8 Hz, 1H), 3.97 (td, *J* = 8.8, 6.0 Hz, 1H), 3.88 (dt, *J* = 8.4, 8.4 Hz, 1H), 3.84 (s, 3H), 3.76 (s, 3H), 3.56 (td, *J* = 8.4, 6.0 Hz, 1H), 3.21 (dt, *J* = 8.8, 8.0 Hz, 1H);

<sup>13</sup>C NMR (100 MHz, CDCl<sub>3</sub>): δ 157.7, 157.4, 156.5, 141.7, 130.2, 129.1, 128.9, 128.5, 128.4, 127.7, 127.4, 126.7, 125.7, 120.6, 120.1, 110.8, 110.7, 61.7, 55.7, 55.6, 53.8, 43.4, 41.9.

HRMS (ESI): [M+H]<sup>+</sup> Calcd for C<sub>25</sub>H<sub>26</sub>NO<sub>4</sub><sup>+</sup>: 404.1856; found: 404.1854.

HPLC (Chiralcel AS-H): n-Hexane/EtOH = 90/10, flow rate 1.0 mL/min, T = 40 °C, λ = 210 nm, t<sub>R</sub> = 8.343 min (major), t<sub>R</sub> = 7.388 min (minor); 48% ee.

<Chromatogram>

mV

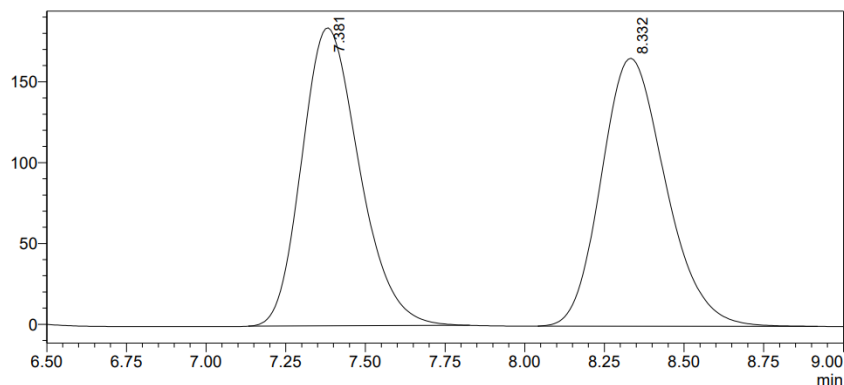

<Peak Table>

检测器A Ch1 210nm

| Peak# | Ret. Time | Area    | Height | Conc.  | Unit | Mark |
|-------|-----------|---------|--------|--------|------|------|
| 1     | 7.381     | 2318568 | 184382 | 49.898 |      | M    |
| 2     | 8.332     | 2328026 | 165698 | 50.102 |      | M    |

<Chromatogram>

mV

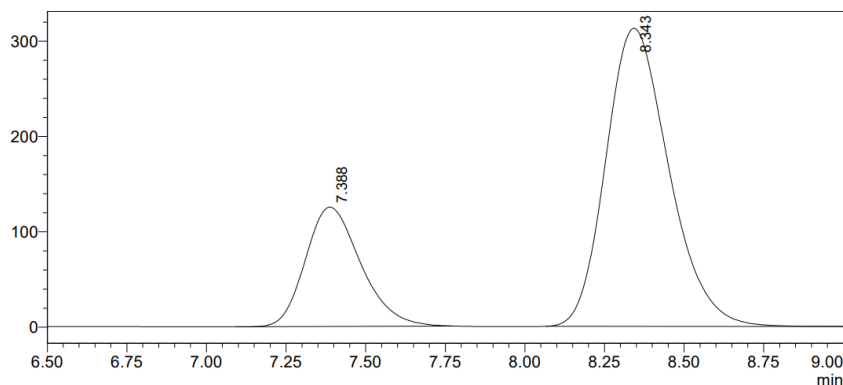

<Peak Table>

检测器A Ch1 210nm

| Peak# | Ret. Time | Area    | Height | Conc.  | Unit | Mark |
|-------|-----------|---------|--------|--------|------|------|
| 1     | 7.388     | 1513628 | 125065 | 26.009 |      | M    |
| 2     | 8.343     | 4306031 | 312783 | 73.991 |      | M    |

### 3-((1*R*,2*R*)-2-(4-isopropylphenyl)-1,2-di-*p*-tolylethyl)oxazolidin-2-one (**3j**)

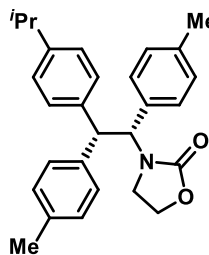

General procedure was followed on 0.2 mmol scale and purification by flash column chromatography on silica gel (PE/Et<sub>2</sub>O/DCM = 10/1/2-5/1/1) afforded **3j** as a white solid (59.6 mg, 72%). R<sub>f</sub> = 0.29 (PE/Et<sub>2</sub>O/DCM = 5/1/1);

[α]<sub>D</sub><sup>23.3</sup> = - 140.42 (c = 0.16, CH<sub>2</sub>Cl<sub>2</sub>);

<sup>1</sup>H NMR (400 MHz, CDCl<sub>3</sub>): 7.37 (d, *J* = 8.0 Hz, 2H), 7.28 (d, *J* = 8.0 Hz, 2H), 7.15 (d, *J* = 8.0 Hz, 4H), 7.05 (d, *J* = 8.0 Hz, 2H), 6.93 (d, *J* = 8.0 Hz, 2H), 5.87 (d, *J* = 12.4 Hz, 1H), 4.60 (d, *J* = 12.4 Hz, 1H), 4.00 (td, *J* = 8.8, 5.2 Hz, 1H), 3.80 (td, *J* = 8.8, 8.4 Hz, 1H), 3.38 (td, *J* = 8.4, 4.8 Hz, 1H), 3.26 (dt, *J* = 8.8, 8.4 Hz, 1H), 2.84 (sept, *J* = 7.2 Hz, 1H), 2.26 (s, 3H), 2.16 (s, 3H), 1.20 (d, *J* = 7.2 Hz, 6H);

$^{13}\text{C}$  NMR (100 MHz,  $\text{CDCl}_3$ ):  $\delta$  158.0, 147.3, 139.2, 138.7, 137.6, 135.9, 134.2, 129.4, 129.4, 128.3, 127.9, 127.4, 127.0, 61.9, 59.0, 51.9, 40.3, 33.7, 24.0, 21.2, 21.0.

HRMS (ESI):  $[\text{M}+\text{H}]^+$  Calcd for  $\text{C}_{28}\text{H}_{32}\text{NO}_2$ : 414.2428; found: 414.2421.

HPLC (Chiralcel AS-H): *n*-Hexane/EtOH = 90/10, flow rate 1.0 mL/min,  $T = 40\text{ }^\circ\text{C}$ ,  $\lambda = 235\text{ nm}$ ,  $t_{\text{R}} = 5.769\text{ min}$  (major),  $t_{\text{R}} = 5.217\text{ min}$  (minor); 98% ee.

<Chromatogram>

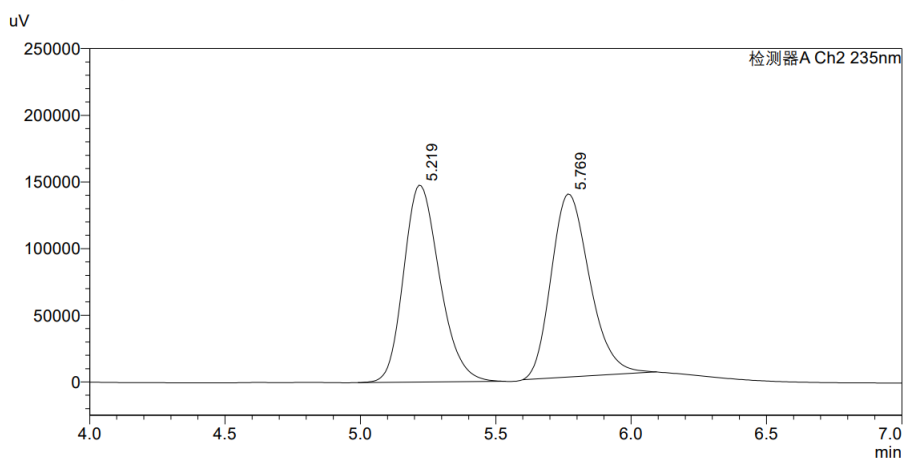

<Peak Table>

| 检测器A Ch2 235nm |           |         |        |        |      |      |
|----------------|-----------|---------|--------|--------|------|------|
| Peak#          | Ret. Time | Area    | Height | Conc.  | Unit | Mark |
| 1              | 5.219     | 1368876 | 147724 | 50.205 |      | M    |
| 2              | 5.769     | 1357700 | 137288 | 49.795 |      | M    |
| 总计             |           | 2726576 | 285012 |        |      |      |

<Chromatogram>

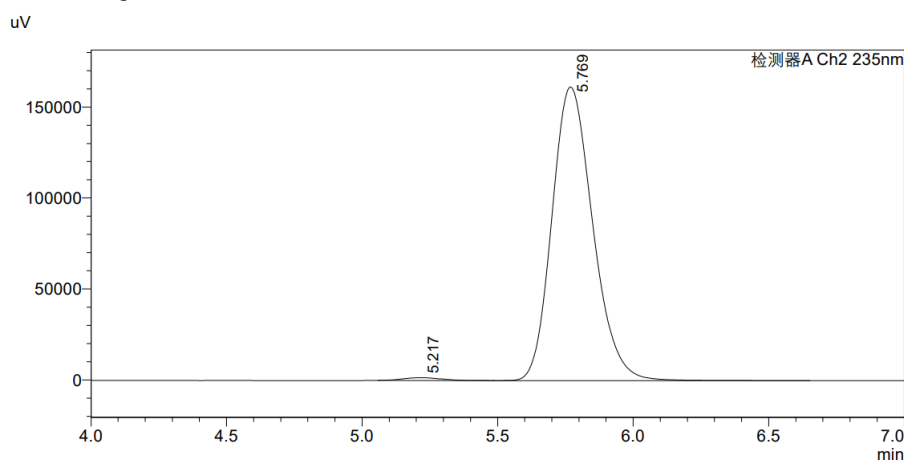

<Peak Table>

| 检测器A Ch2 235nm |           |         |        |        |      |      |
|----------------|-----------|---------|--------|--------|------|------|
| Peak#          | Ret. Time | Area    | Height | Conc.  | Unit | Mark |
| 1              | 5.217     | 14611   | 1522   | 0.857  |      | M    |
| 2              | 5.769     | 1690967 | 161454 | 99.143 |      | M    |
| 总计             |           | 1705578 | 162975 |        |      |      |

### 3-((1*R*,2*R*)-2-(4-(*tert*-butyl)phenyl)-1,2-di-*p*-tolylethyl)oxazolidin-2-one (3k)

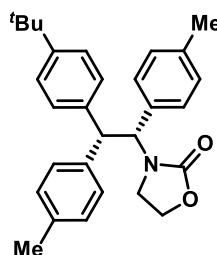

General procedure was followed on 0.2 mmol scale and purification by flash column chromatography on silica gel (PE/Et<sub>2</sub>O/DCM = 10/1/1~8/1/1) afforded **3k** as a white solid (61.6 mg, 72%).  $R_f = 0.34$  (PE/Et<sub>2</sub>O/DCM = 8/1/1);

$[\alpha]_{\text{D}}^{23.3} = -147.30$  ( $c = 0.15$ ,  $\text{CH}_2\text{Cl}_2$ );

$^1\text{H}$  NMR (400 MHz,  $\text{CDCl}_3$ ): 7.39 (d,  $J = 8.4\text{ Hz}$ , 2H), 7.32 – 7.28 (m, 4H), 7.16 (d,  $J = 7.6\text{ Hz}$ , 2H), 7.05 (d,  $J = 7.6\text{ Hz}$ , 2H), 6.93 (d,  $J = 7.6\text{ Hz}$ , 2H), 5.88 (d,  $J = 12.4\text{ Hz}$ , 1H), 4.60 (d,  $J = 12.8\text{ Hz}$ , 1H), 4.00 (td,  $J = 8.8$ ,



5.2 Hz, 1H), 3.79 (dt,  $J = 8.8, 8.8$  Hz, 1H), 3.39 (td,  $J = 8.4, 4.8$  Hz, 1H), 3.27 (dt,  $J = 8.8, 8.4$  Hz, 1H), 2.26 (s, 3H), 2.16 (s, 3H), 1.27 (s, 9H);

$^{13}\text{C}$  NMR (100 MHz,  $\text{CDCl}_3$ ):  $\delta$  158.0, 149.6, 138.8, 138.7, 137.6, 135.9, 134.2, 129.4, 129.4, 128.3, 127.9, 127.1, 125.8, 61.9, 59.0, 51.8, 40.3, 34.5, 31.4, 21.2, 21.0.

HRMS (ESI):  $[\text{M}+\text{H}]^+$  Calcd for  $\text{C}_{29}\text{H}_{33}\text{NO}_2^+$ : 428.2584; found: 428.2584.

HPLC (Chiralcel AS-H): *n*-Hexane/EtOH = 90/10, flow rate 1.0 mL/min,  $T = 40$  °C,  $\lambda = 210$  nm,  $t_R = 5.473$  min (major),  $t_R = 4.853$  min (minor); 95% ee.

<Chromatogram>

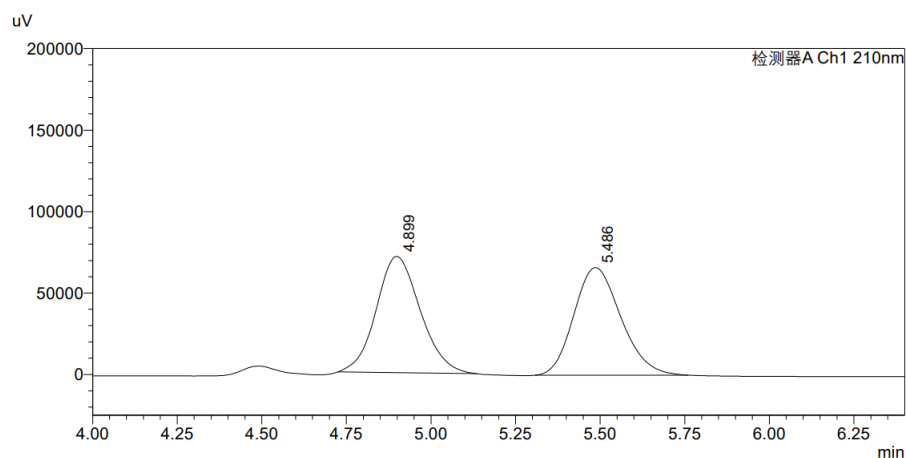

<Peak Table>

| 检测器A Ch1 210nm |           |         |        |        |      |      |
|----------------|-----------|---------|--------|--------|------|------|
| Peak#          | Ret. Time | Area    | Height | Conc.  | Unit | Mark |
| 1              | 4.899     | 645883  | 71403  | 50.297 |      | M    |
| 2              | 5.486     | 638264  | 66097  | 49.703 |      | M    |
| 总计             |           | 1284147 | 137500 |        |      |      |

<Chromatogram>

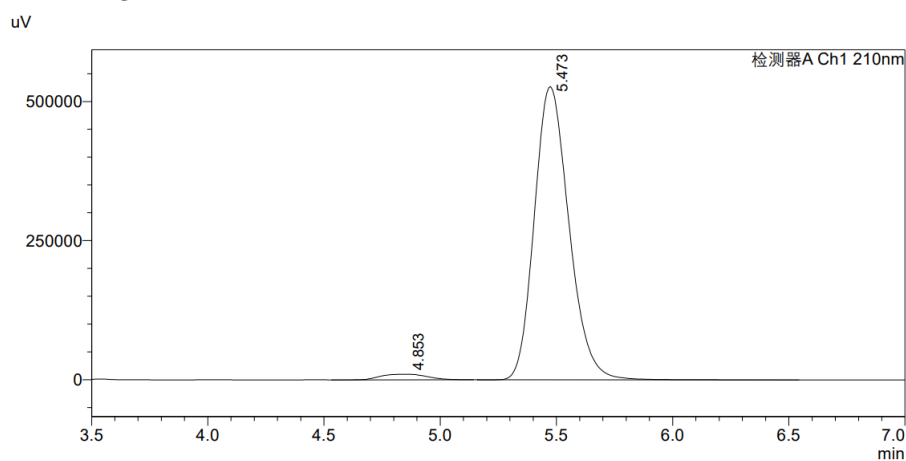

<Peak Table>

| 检测器A Ch1 210nm |           |         |        |        |      |      |
|----------------|-----------|---------|--------|--------|------|------|
| Peak#          | Ret. Time | Area    | Height | Conc.  | Unit | Mark |
| 1              | 4.853     | 138328  | 10060  | 2.466  |      | M    |
| 2              | 5.473     | 5471669 | 527193 | 97.534 |      | M    |
| 总计             |           | 5609996 | 537253 |        |      |      |

**3-((1*R*,2*R*)-2-(4-methoxyphenyl)-1,2-di-*p*-tolylethyl)oxazolidin-2-one (3I)**

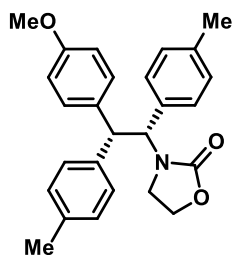

General procedure was followed on 0.2 mmol scale and purification by flash column chromatography on silica gel (PE/Et<sub>2</sub>O/CHCl<sub>3</sub> = 4/1/0.5~PE/acetone/CHCl<sub>3</sub> = 8/1/0.5) afforded **3I** as a white solid (54.6 mg, 68%). **R<sub>f</sub>** = 0.21 (PE/Et<sub>2</sub>O/CHCl<sub>3</sub> = 2/1/0.5);

**[α]<sub>D</sub><sup>23.3</sup>** = - 104.44 (c = 0.15, CH<sub>2</sub>Cl<sub>2</sub>);

**<sup>1</sup>H NMR** (400 MHz, CDCl<sub>3</sub>): 7.37 (d, *J* = 8.8 Hz, 2H), 7.27 (d, *J* = 8.0 Hz, 2H), 7.12 (d, *J* = 8.0 Hz, 2H), 7.05 (d, *J* = 7.6 Hz, 2H), 6.92 (t, *J* = 7.6 Hz, 2H), 6.84 (d, *J* = 8.8 Hz, 2H), 5.82 (d, *J* = 12.8 Hz, 1H), 4.57 (d, *J* = 12.4 Hz, 1H), 4.01 (td, *J* = 8.8, 5.2 Hz, 1H), 3.85 (dt, *J* = 8.4, 8.8 Hz, 1H), 3.75 (s, 3H), 3.38 (td, *J* = 8.4, 5.2 Hz, 1H), 3.26 (dt, *J* = 8.4, 8.4 Hz, 1H), 2.25 (s, 3H), 2.15 (s, 3H);

**<sup>13</sup>C NMR** (100 MHz, CDCl<sub>3</sub>): δ 158.4, 158.0, 138.7, 137.6, 135.9, 134.2, 129.4, 129.4, 128.6, 128.3, 127.8, 114.3, 61.9, 59.1, 55.3, 51.3, 40.3, 21.2, 21.0.

**HRMS (ESI)**: [M+H]<sup>+</sup> Calcd for C<sub>26</sub>H<sub>28</sub>NO<sub>3</sub><sup>+</sup>: 402.2064; found: 402.2068.

**HPLC** (Chiralcel AS-H): *n*-Hexane/EtOH = 90/10, flow rate 1.0 mL/min, T = 40 °C, λ = 210 nm, t<sub>R</sub> = 10.397 min (major), t<sub>R</sub> = 8.689 min (minor); 98% ee.

<Chromatogram>

uV

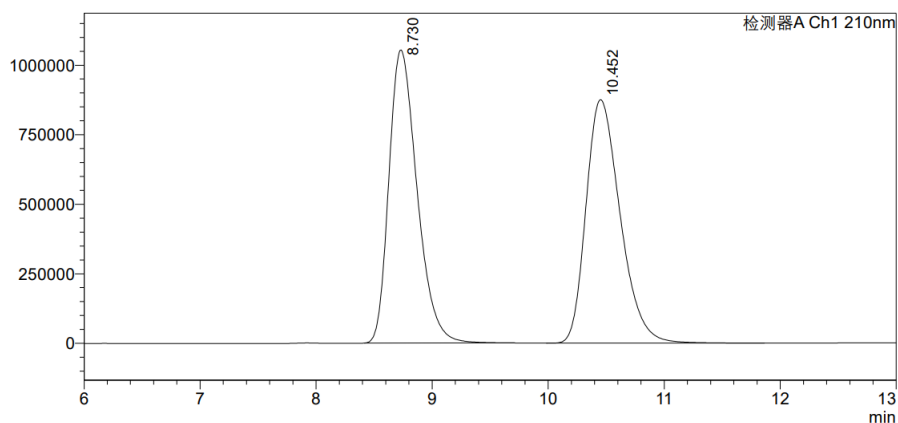

<Peak Table>

检测器A Ch1 210nm

| Peak# | Ret. Time | Area     | Height  | Conc.  | Unit | Mark |
|-------|-----------|----------|---------|--------|------|------|
| 1     | 8.730     | 17768386 | 1053524 | 49.792 |      | M    |
| 2     | 10.452    | 17916830 | 875255  | 50.208 |      | M    |
| 总计    |           | 35685216 | 1928778 |        |      |      |

<Chromatogram>

uV

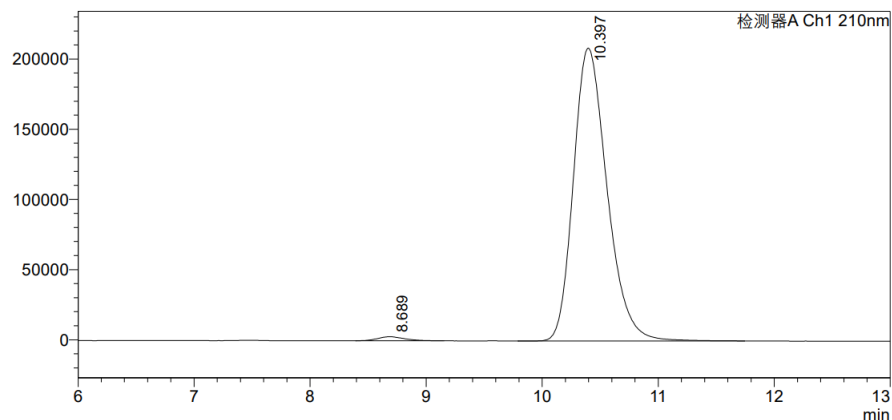

<Peak Table>

| Peak# | Ret. Time | Area    | Height | Conc.  | Unit | Mark |
|-------|-----------|---------|--------|--------|------|------|
| 1     | 8.689     | 46536   | 2864   | 1.095  |      | M    |
| 2     | 10.397    | 4202519 | 208618 | 98.905 |      | M    |
| 总计    |           | 4249055 | 211481 |        |      |      |

3-((1*R*,2*R*)-2-(4-fluorophenyl)-1,2-di-*p*-tolylethyl)oxazolidin-2-one (**3m**)

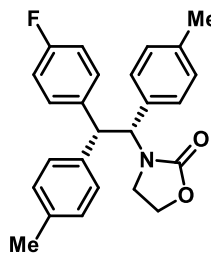

General procedure was followed on 0.2 mmol scale and purification by flash column chromatography on silica gel (PE/Et<sub>2</sub>O/CHCl<sub>3</sub> = 4/1/0.5~PE/acetone/CHCl<sub>3</sub> = 8/1/0.5) afforded **3m** as a white solid (41.0 mg, 53%). **Rf** = 0.31 (PE/Et<sub>2</sub>O/CHCl<sub>3</sub> = 2/1/0.5);

**[α]<sub>D</sub><sup>23.3</sup>** = - 146.67 (c = 0.08, CH<sub>2</sub>Cl<sub>2</sub>);

**<sup>1</sup>H NMR** (400 MHz, CDCl<sub>3</sub>): 7.43 (td, *J* = 6.8, 2.0 Hz, 2H), 7.27 (d, *J* = 7.6 Hz, 2H), 7.12 (d, *J* = 7.6 Hz, 2H), 7.06 (d, *J* = 7.6 Hz, 2H), 7.00 (t, *J* = 8.4 Hz, 2H), 6.94 (d, *J* = 7.6 Hz, 2H), 5.84 (d, *J* = 12.4 Hz, 1H), 4.64 (d, *J* = 12.4 Hz, 1H), 4.04 (td, *J* = 8.8, 5.2 Hz, 1H), 3.87 (dt, *J* = 8.8, 8.4 Hz, 1H), 3.36 (td, *J* = 8.4, 5.2 Hz, 1H), 3.23 (dt, *J* = 8.8, 8.4 Hz, 1H), 2.26 (s, 3H), 2.17 (s, 3H);

**<sup>13</sup>C NMR** (100 MHz, CDCl<sub>3</sub>): δ 161.8 (d, *J*<sub>C-F</sub> = 243.9 Hz), 157.9, 138.2, 137.9 (d, *J*<sub>C-F</sub> = 3.2 Hz), 137.8, 136.3, 133.8, 129.5, 129.5, 129.1 (d, *J*<sub>C-F</sub> = 7.9 Hz), 128.3, 127.8, 115.8 (d, *J*<sub>C-F</sub> = 21.2 Hz), 61.9, 59.1, 51.3, 40.3, 21.2, 21.0.

**<sup>19</sup>F NMR** (376 MHz, CDCl<sub>3</sub>): δ -115.9;

**HRMS (ESI)**: [M+H]<sup>+</sup> Calcd for C<sub>25</sub>H<sub>25</sub>FNO<sub>2</sub><sup>+</sup>: 390.1864; found: 390.1866.

**HPLC** (Chiralcel AD-H): *n*-Hexane/*i*-PrOH = 90/10, flow rate 1.0 mL/min, T = 40 °C, λ = 210 nm, *t<sub>R</sub>* = 14.419 min (major), *t<sub>R</sub>* = 16.807 min (minor); 98% ee.

<Chromatogram>

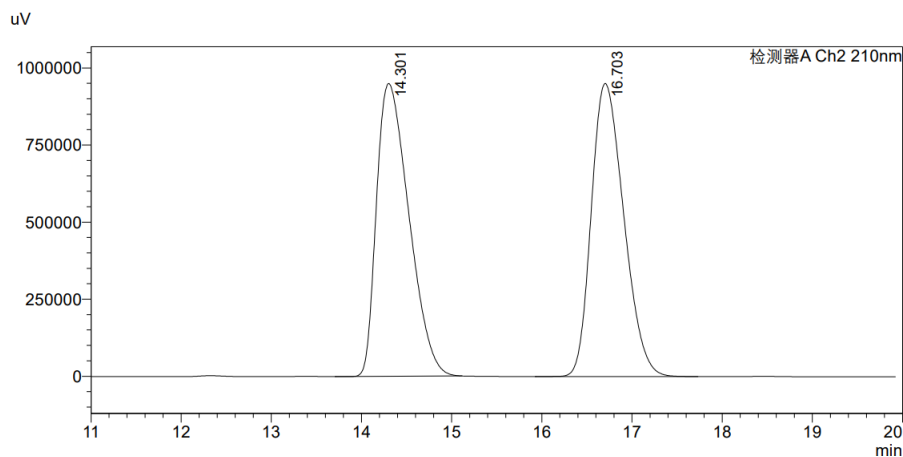

<Peak Table>

| Peak# | Ret. Time | Area     | Height  | Conc.  | Unit | Mark |
|-------|-----------|----------|---------|--------|------|------|
| 1     | 14.301    | 23738063 | 949745  | 49.928 |      | M    |
| 2     | 16.703    | 23806062 | 950682  | 50.072 |      | M    |
| 总计    |           | 47544125 | 1900427 |        |      |      |

<Chromatogram>

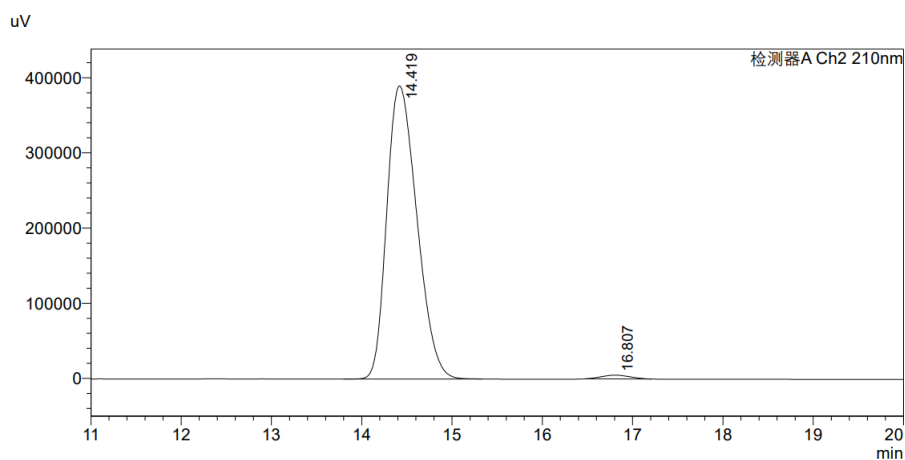

<Peak Table>

| Peak# | Ret. Time | Area    | Height | Conc.  | Unit | Mark |
|-------|-----------|---------|--------|--------|------|------|
| 1     | 14.419    | 9043554 | 390000 | 98.808 |      | M    |
| 2     | 16.807    | 109093  | 4994   | 1.192  |      | M    |
| 总计    |           | 9152647 | 394994 |        |      |      |

**3-((1*R*,2*R*)-2-(4-chlorophenyl)-1,2-di-*p*-tolylethyl)oxazolidin-2-one (3n)**

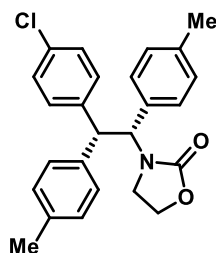

General procedure was followed on 0.2 mmol scale and purification by flash column chromatography on silica gel (PE/Et<sub>2</sub>O/CHCl<sub>3</sub>= 4/1/0.5~2/1/0.5) afforded **3n** as a white solid (36.7 mg, 45%). *R<sub>f</sub>* = 0.33 (PE/acetone/DCM = 8/1/1);

$[\alpha]_D^{23.3} = -129.74$  (*c* = 0.13, CH<sub>2</sub>Cl<sub>2</sub>);

<sup>1</sup>H NMR (400 MHz, CDCl<sub>3</sub>): 7.40 (d, *J* = 8.4 Hz, 2H), 7.28 (d, *J* = 8.4 Hz, 2H), 7.26 (d, *J* = 6.8 Hz, 2H), 7.10 (d, *J* = 8.0 Hz, 2H), 7.06 (d, *J* = 7.6 Hz, 2H), 6.93 (d, *J* = 7.6 Hz, 2H), 5.83 (d, *J* = 12.4 Hz, 1H), 4.62 (d, *J* = 12.4 Hz, 1H), 4.05 (td, *J* = 8.8, 5.2 Hz, 1H), 3.89 (dt, *J* = 8.8, 8.8 Hz, 1H), 3.35 (td, *J* = 8.4, 5.2 Hz, 1H), 3.26 (dt, *J* = 9.2, 8.4 Hz, 1H), 2.26 (s, 3H), 2.17 (s, 3H);

<sup>13</sup>C NMR (100 MHz, CDCl<sub>3</sub>): δ 157.9, 140.7, 137.9, 137.9, 136.4, 133.7, 132.8, 129.6, 129.5, 129.1, 129.0, 128.3, 127.8, 61.9, 58.9, 51.5, 40.3, 21.2, 21.0.

**HRMS (ESI):** [M-Cl+Na]<sup>+</sup> Calcd for C<sub>25</sub>H<sub>24</sub>NO<sub>2</sub>Na<sup>+</sup>: 393.1699; found: 393.1693.

**HPLC** (Chiralcel AD-H): *n*-Hexane/*i*-PrOH = 90/10, flow rate 1.0 mL/min, T = 40 °C, λ = 210 nm, *t<sub>R</sub>* = 16.988 min (major), *t<sub>R</sub>* = 18.236 min (minor); 97% ee.

<Chromatogram>

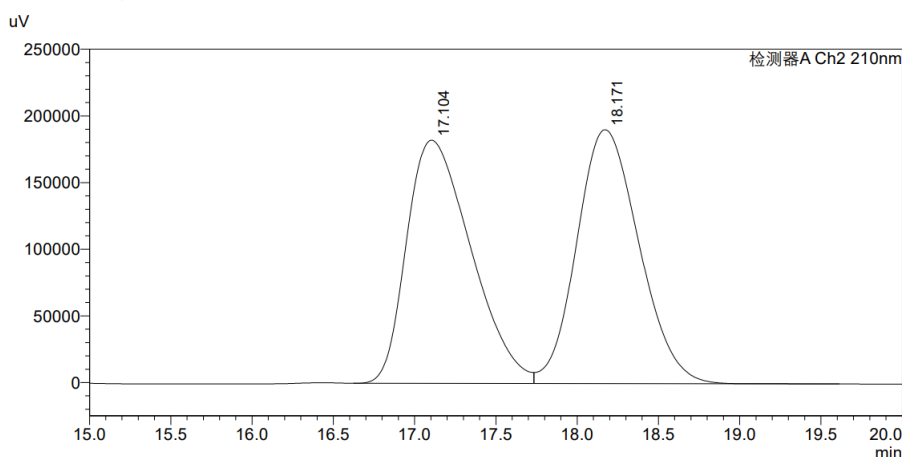

<Peak Table>

| 检测器A Ch2 210nm |           |          |        |        |      |      |
|----------------|-----------|----------|--------|--------|------|------|
| Peak#          | Ret. Time | Area     | Height | Conc.  | Unit | Mark |
| 1              | 17.104    | 5028192  | 182388 | 49.719 |      | M    |
| 2              | 18.171    | 5084933  | 190426 | 50.281 |      | V M  |
| 总计             |           | 10113125 | 372813 |        |      |      |

<Chromatogram>

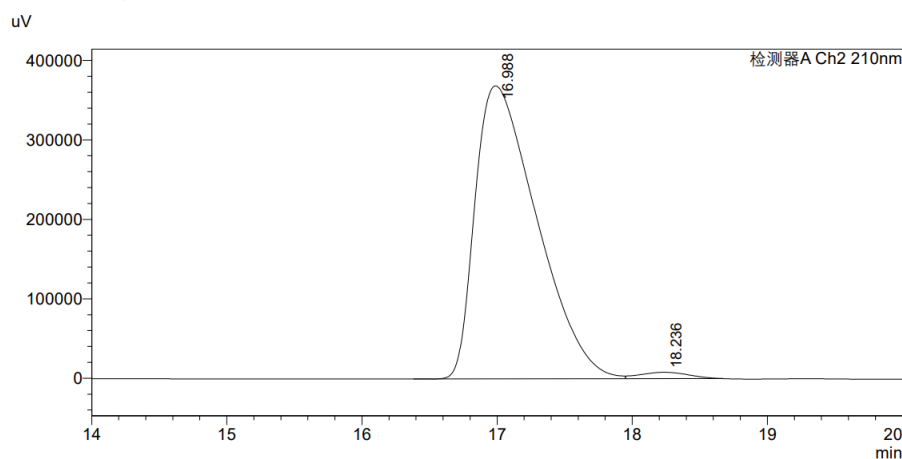

<Peak Table>

| 检测器A Ch2 210nm |           |          |        |        |      |      |
|----------------|-----------|----------|--------|--------|------|------|
| Peak#          | Ret. Time | Area     | Height | Conc.  | Unit | Mark |
| 1              | 16.988    | 11755167 | 368819 | 98.304 |      | M    |
| 2              | 18.236    | 202752   | 8098   | 1.696  |      | V M  |
| 总计             |           | 11957920 | 376918 |        |      |      |

**3-((1*R*,2*R*)-2-(3-methoxyphenyl)-1,2-di-*p*-tolylethyl)oxazolidin-2-one (3o)**

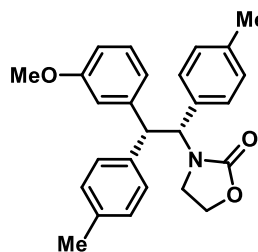

General procedure was followed on 0.2 mmol scale and purification by flash column chromatography on silica gel (PE/Et<sub>2</sub>O/DCM= 8/1/1~5/1/1) afforded **3o** as a white solid (45.0 mg, 56%). *R<sub>f</sub>* = 0.20 (PE/Et<sub>2</sub>O/DCM= 4/1/1);

$[\alpha]_D^{23.3} = -129.02$  (*c* = 0.17, CH<sub>2</sub>Cl<sub>2</sub>);

<sup>1</sup>H NMR (400 MHz, CDCl<sub>3</sub>): 7.28 (d, *J* = 8.0 Hz, 2H), 7.22 (t, *J* = 8.0 Hz, 1H), 7.15 (d, *J* = 8.0 Hz, 2H), 7.06 (d, *J* = 8.0 Hz, 3H), 7.02 (bs, 1H), 6.93 (d, *J* = 7.6 Hz, 2H), 6.73 (dd, *J* = 8.4, 2.8 Hz, 1H), 5.87 (d, *J* = 12.4 Hz, 1H), 4.61 (d, *J* = 12.8 Hz, 1H), 4.01 (td, *J* = 8.8, 5.2 Hz, 1H), 3.85 (dt, *J* = 8.8, 8.4 Hz, 1H), 3.80 (s, 3H), 3.40 (td, *J* = 8.4, 5.2 Hz, 1H), 3.26 (dt, *J* = 8.8, 8.4 Hz, 1H), 2.26 (s, 3H), 2.16 (s, 3H);

<sup>13</sup>C NMR (100 MHz, CDCl<sub>3</sub>): δ 159.9, 157.9, 143.5, 138.2, 137.7, 136.1, 134.0, 129.9, 129.4, 129.4, 128.3, 127.9, 120.0, 113.2, 112.5, 61.9, 58.8, 55.3, 52.1, 40.3, 21.2, 21.0.

**HRMS (ESI):** [M+H]<sup>+</sup> Calcd for C<sub>26</sub>H<sub>28</sub>NO<sub>3</sub><sup>+</sup>: 402.2064; found: 402.2061.

**HPLC** (Chiralcel AS-H): *n*-Hexane/EtOH = 90/10, flow rate 1.0 mL/min, T = 40 °C,  $\lambda$  = 235 nm,  $t_R$  = 8.479 min (major),  $t_R$  = 6.971 min (minor); 95% ee.

<Chromatogram>

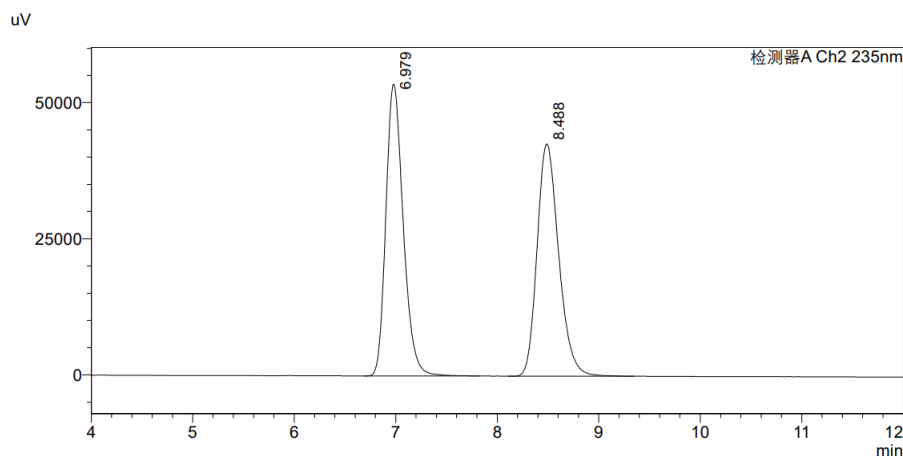

<Peak Table>

| 检测器A Ch2 235nm |           |         |        |        |      |      |
|----------------|-----------|---------|--------|--------|------|------|
| Peak#          | Ret. Time | Area    | Height | Conc.  | Unit | Mark |
| 1              | 6.979     | 638119  | 53598  | 50.233 |      |      |
| 2              | 8.488     | 632210  | 42663  | 49.767 |      |      |
| 总计             |           | 1270329 | 96261  |        |      |      |

<Chromatogram>

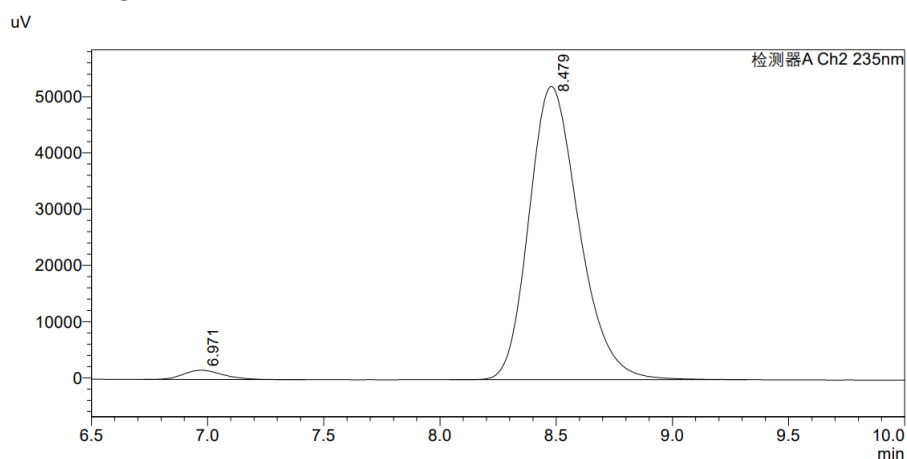

<Peak Table>

| 检测器A Ch2 235nm |           |        |        |        |      |      |
|----------------|-----------|--------|--------|--------|------|------|
| Peak#          | Ret. Time | Area   | Height | Conc.  | Unit | Mark |
| 1              | 6.971     | 19560  | 1654   | 2.440  |      | M    |
| 2              | 8.479     | 782095 | 52102  | 97.560 |      | M    |
| 总计             |           | 801655 | 53756  |        |      |      |

### 3-((1*R*,2*R*)-2-(3-phenoxyphenyl)-1,2-di-*p*-tolylethyl)oxazolidin-2-one (**3p**)

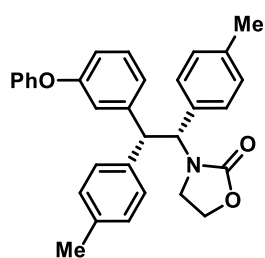

General procedure was followed on 0.2 mmol scale and purification by flash column chromatography on silica gel (PE/acetone/CHCl<sub>3</sub> = 8/1/1) afforded **3p** as a white solid (74.8 mg, 81%). **R<sub>f</sub>** = 0.30 (PE/acetone/CHCl<sub>3</sub> = 8/1/1);

$[\alpha]_D^{23.3}$  = - 125.42 (c = 0.16, CH<sub>2</sub>Cl<sub>2</sub>);

<sup>1</sup>H NMR (400 MHz, CDCl<sub>3</sub>): 7.35 (t, *J* = 7.6 Hz, 2H), 7.32 – 7.26 (m, 4H), 7.16 – 7.14 (m, 3H), 7.11 (d, *J* = 7.2 Hz, 1H), 7.07 (d, *J* = 8.0 Hz, 2H), 6.98 (dd, *J* = 10.0, 8.8, 1.2 Hz, 4H), 6.84 (dt, *J* = 7.6, 2.0 Hz, 1H), 5.85 (d, *J* = 12.4 Hz, 1H), 4.63 (d, *J* = 12.8 Hz, 1H), 4.07 (td, *J* = 8.8, 5.2 Hz, 1H), 3.93 (td, *J* = 8.8, 8.4 Hz, 1H), 3.44 (td, *J* = 8.4, 5.2 Hz, 1H), 3.26 (td, *J* = 8.8, 8.4 Hz, 1H), 2.27 (s, 3H), 2.20 (s, 3H);

<sup>13</sup>C NMR (100 MHz, CDCl<sub>3</sub>): δ 157.8, 157.4, 157.2, 144.2, 137.9, 137.7, 136.2, 133.9, 130.3, 129.8, 129.4, 129.4, 128.3, 127.9, 123.2, 122.5, 118.8, 118.7, 117.4, 61.8, 59.1, 51.9, 40.4, 21.1, 21.0.

HRMS (ESI): [M+H]<sup>+</sup> Calcd for C<sub>31</sub>H<sub>30</sub>NO<sub>3</sub><sup>+</sup>: 464.2220; found: 464.2218.

HPLC (Chiralcel OD-H): *n*-Hexane/*i*-PrOH = 90/10, flow rate 1.0 mL/min, T = 40 °C, λ = 210 nm, t<sub>R</sub> = 11.416 min (major), t<sub>R</sub> = 8.999 min (minor); >99% ee.

<Chromatogram>

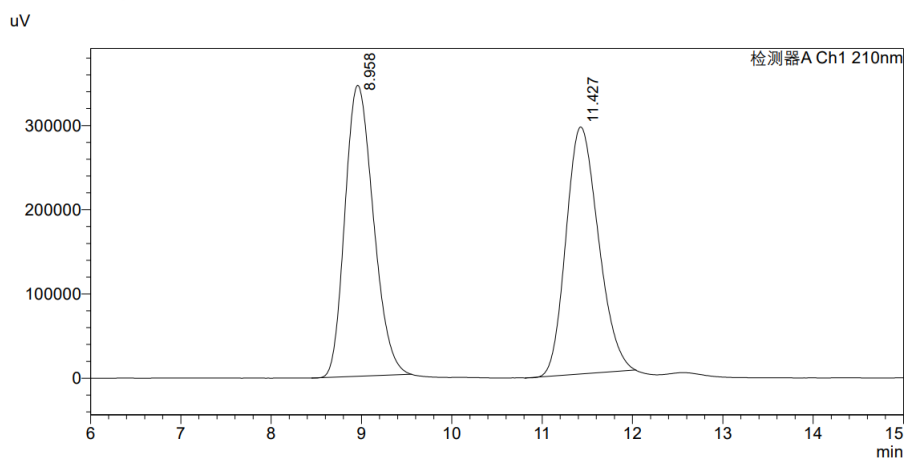

<Peak Table>

| 检测器A Ch1 210nm |           |          |        |        |      |      |
|----------------|-----------|----------|--------|--------|------|------|
| Peak#          | Ret. Time | Area     | Height | Conc.  | Unit | Mark |
| 1              | 8.958     | 7562447  | 345610 | 50.806 |      | M    |
| 2              | 11.427    | 7322615  | 293312 | 49.194 |      | M    |
| 总计             |           | 14885062 | 638922 |        |      |      |

<Chromatogram>

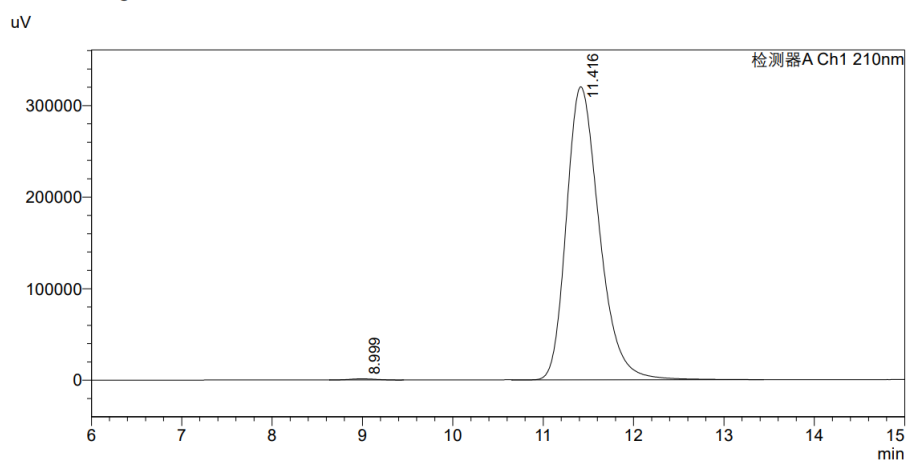

<Peak Table>

| 检测器A Ch1 210nm |           |         |        |        |      |      |
|----------------|-----------|---------|--------|--------|------|------|
| Peak#          | Ret. Time | Area    | Height | Conc.  | Unit | Mark |
| 1              | 8.999     | 24384   | 1297   | 0.300  |      | M    |
| 2              | 11.416    | 8108731 | 320022 | 99.700 |      | M    |
| 总计             |           | 8133115 | 321318 |        |      |      |

### 3-((1*R*,2*R*)-2-(3-fluorophenyl)-1,2-di-*p*-tolylethyl)oxazolidin-2-one (**3q**)

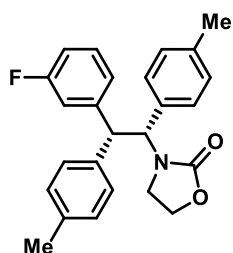

General procedure was followed on 0.2 mmol scale and purification by flash column chromatography on silica gel (PE/acetone/DCM = 10/1/1) afforded **3q** as a white solid (44.1 mg, 57%). R<sub>f</sub> = 0.29 (PE/acetone/DCM = 8/1/1);

[α]<sub>D</sub><sup>23.3</sup> = -166.98 (c = 0.21, CH<sub>2</sub>Cl<sub>2</sub>);

**<sup>1</sup>H NMR** (400 MHz, CDCl<sub>3</sub>): 7.27 – 7.24 (m, 4H), 7.15 – 7.11 (m, 3H), 7.04 (d, *J* = 8.0 Hz, 2H), 6.93 (d, *J* = 7.6 Hz, 2H), 6.89 – 6.84 (m, 1H), 5.82 (d, *J* = 12.8 Hz, 1H), 4.64 (d, *J* = 12.8 Hz, 1H), 4.01 (td, *J* = 8.8, 5.2 Hz, 1H), 3.87 (dt, *J* = 8.8, 8.4 Hz, 1H), 3.38 (td, *J* = 8.4, 5.2 Hz, 1H), 3.24 (dt, *J* = 8.4, 8.4 Hz, 1H), 2.24 (s, 3H), 2.15 (s, 3H);

**<sup>13</sup>C NMR** (100 MHz, CDCl<sub>3</sub>): δ 163.0 (d, *J*<sub>C-F</sub> = 244.8 Hz), 157.9, 144.7 (d, *J*<sub>C-F</sub> = 6.7 Hz), 137.8, 137.7, 136.4, 133.7, 130.5 (d, *J*<sub>C-F</sub> = 8.3 Hz), 129.5, 129.4, 128.3, 127.9, 123.2 (d, *J*<sub>C-F</sub> = 2.8 Hz), 114.8 (d, *J*<sub>C-F</sub> = 21.4 Hz), 114.0 (d, *J*<sub>C-F</sub> = 20.9 Hz), 61.9, 59.0, 51.9, 40.4, 21.2, 21.0.

**<sup>19</sup>F NMR** (376 MHz, CDCl<sub>3</sub>): δ -112.4;

**HRMS (ESI):** [M+H]<sup>+</sup> Calcd for C<sub>25</sub>H<sub>25</sub>FNO<sub>2</sub><sup>+</sup>: 390.1864; found: 390.1858.

**HPLC** (Chiralcel AD-H): *n*-Hexane/*i*-PrOH = 90/10, flow rate 1.0 mL/min, T = 40 °C, λ = 210 nm, t<sub>R</sub> = 13.695 min (major), t<sub>R</sub> = 12.796 min (minor); 99% ee.

<Chromatogram>

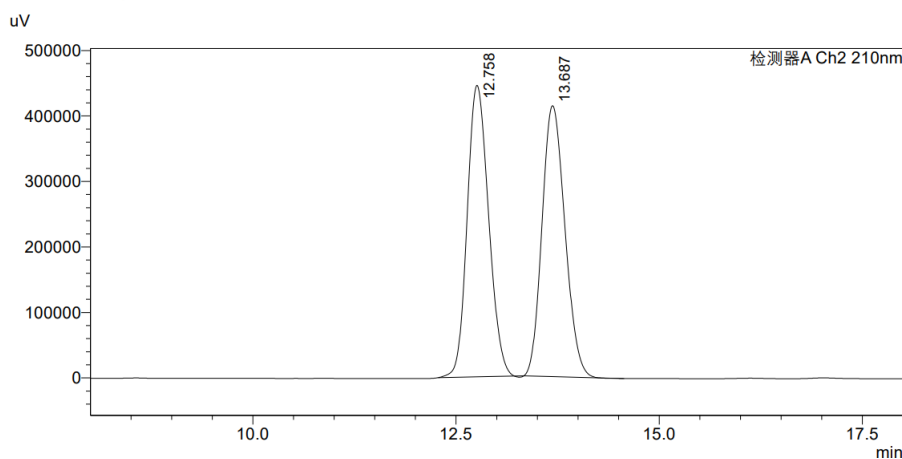

<Peak Table>

| 检测器A Ch2 210nm |           |          |        |        |      |      |
|----------------|-----------|----------|--------|--------|------|------|
| Peak#          | Ret. Time | Area     | Height | Conc.  | Unit | Mark |
| 1              | 12.758    | 8173066  | 445083 | 50.130 |      | M    |
| 2              | 13.687    | 8130622  | 413770 | 49.870 |      | M    |
| 总计             |           | 16303688 | 858853 |        |      |      |

<Chromatogram>

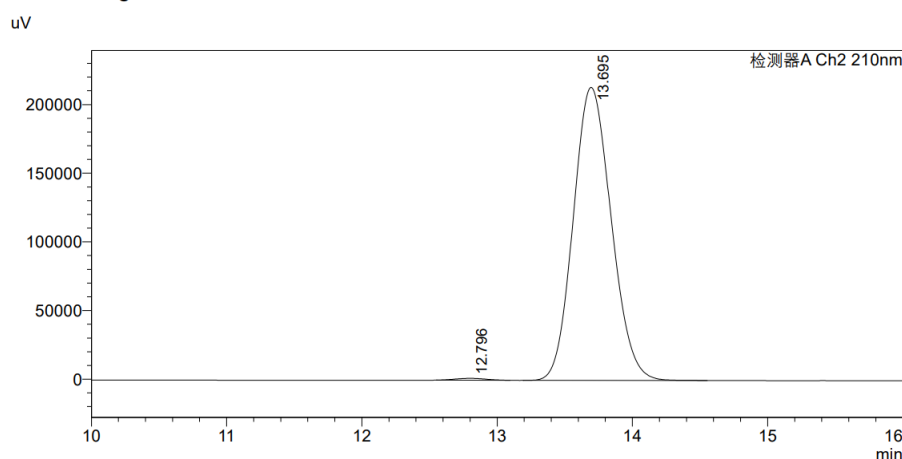

<Peak Table>

| 检测器A Ch2 210nm |           |         |        |        |      |      |
|----------------|-----------|---------|--------|--------|------|------|
| Peak#          | Ret. Time | Area    | Height | Conc.  | Unit | Mark |
| 1              | 12.796    | 22113   | 1373   | 0.528  |      | M    |
| 2              | 13.695    | 4165842 | 213457 | 99.472 |      | M    |
| 总计             |           | 4187955 | 214831 |        |      |      |

**3-((1*R*,2*R*)-2-(3,4-dimethylphenyl)-1,2-di-*p*-tolylethyl)oxazolidin-2-one (3r)**



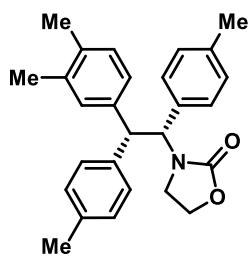

General procedure was followed on 0.2 mmol scale and purification by flash column chromatography on silica gel (PE/acetone/ $\text{CHCl}_3 = 10/1/1$ ) afforded **3r** as a white solid (42.2 mg, 53%).  $R_f = 0.21$  (PE/acetone/ $\text{CHCl}_3 = 8/1/1$ );

$[\alpha]_D^{23.3} = -111.67$  ( $c = 0.16$ ,  $\text{CH}_2\text{Cl}_2$ );

$^1\text{H NMR}$  (400 MHz,  $\text{CDCl}_3$ ): 7.27 (d,  $J = 9.2$  Hz, 2H), 7.19 (bs, 2H), 7.13 (d,  $J = 8.0$  Hz, 2H), 7.05 (d,  $J = 8.0$  Hz, 3H), 6.92 (d,  $J = 8.0$  Hz, 2H), 5.85 (d,  $J = 12.8$  Hz, 1H), 4.55 (d,  $J = 12.8$  Hz, 1H), 4.01 (td,  $J = 8.8, 5.2$  Hz, 1H), 3.86 (dt,  $J = 8.4, 8.8$  Hz, 1H), 3.41 (td,  $J = 8.4, 5.2$  Hz, 1H), 3.27 (dt,  $J = 8.8, 8.4$  Hz, 1H), 2.26 (s, 3H), 2.22 (s, 3H), 2.18 (s, 3H), 2.15 (s, 3H);

$^{13}\text{C NMR}$  (100 MHz,  $\text{CDCl}_3$ ):  $\delta$  157.9, 139.4, 138.8, 137.5, 137.0, 135.9, 135.1, 134.3, 130.1, 129.4, 129.3, 128.9, 128.3, 127.8, 124.8, 61.8, 58.9, 51.7, 40.2, 21.2, 21.0, 20.1, 19.5.

**HRMS (ESI)**:  $[\text{M}+\text{H}]^+$  Calcd for  $\text{C}_{27}\text{H}_{30}\text{NO}_2^+$ : 400.2271; found: 400.2270.

**HPLC** (Chiralcel AS-H): *n*-Hexane/*i*-PrOH = 90/10, flow rate 1.0 mL/min,  $T = 40^\circ\text{C}$ ,  $\lambda = 235$  nm,  $t_R = 9.942$  min (major),  $t_R = 8.160$  min (minor); 96% ee.

<Chromatogram>

uv

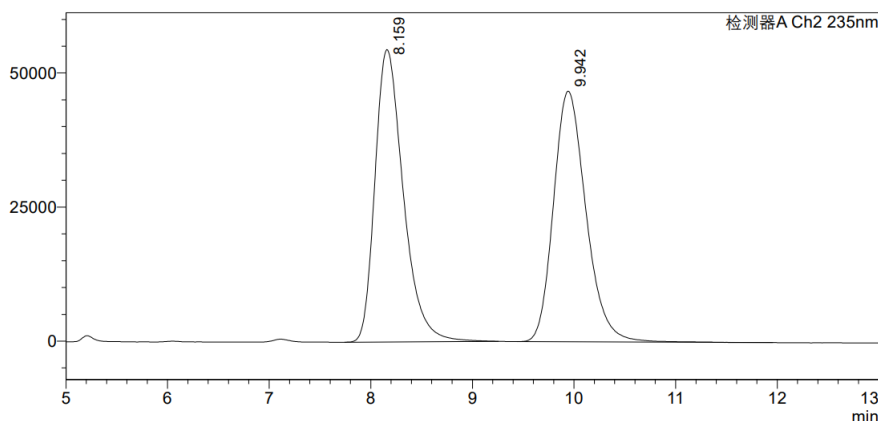

<Peak Table>

检测器A Ch2 235nm

| Peak# | Ret. Time | Area    | Height | Conc.  | Unit | Mark |
|-------|-----------|---------|--------|--------|------|------|
| 1     | 8.159     | 1057051 | 54530  | 50.414 |      | M    |
| 2     | 9.942     | 1039683 | 46748  | 49.586 |      | M    |
| 总计    |           | 2096733 | 101278 |        |      |      |

<Chromatogram>

uv

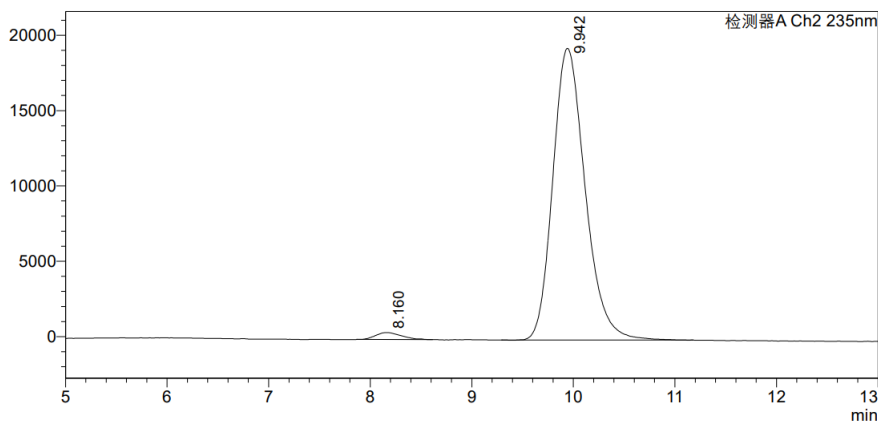

<Peak Table>

检测器A Ch2 235nm

| Peak# | Ret. Time | Area   | Height | Conc.  | Unit | Mark |
|-------|-----------|--------|--------|--------|------|------|
| 1     | 8.160     | 8067   | 460    | 1.846  |      | M    |
| 2     | 9.942     | 428963 | 19360  | 98.154 |      | M    |
| 总计    |           | 437029 | 19820  |        |      |      |

3-((1*R*,2*R*)-2-(2,3-dihydrobenzofuran-5-yl)-1,2-di-*p*-tolylethyl)oxazolidin-2-one (**3s**)

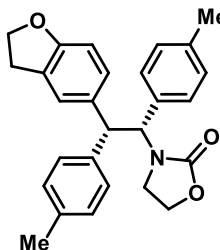

General procedure was followed on 0.2 mmol scale and purification by flash column chromatography on silica gel (PE/acetone/CHCl<sub>3</sub> = 10/1/1–8/1/1) afforded **3s** as a white solid (50.5 mg, 61%). **R<sub>f</sub>** = 0.19 (PE/acetone/CHCl<sub>3</sub> = 8/1/1);

**[α]<sub>D</sub><sup>23.3</sup>** = - 111.76 (c = 0.17, CH<sub>2</sub>Cl<sub>2</sub>);

**<sup>1</sup>H NMR** (400 MHz, CDCl<sub>3</sub>): 7.30 (bs, 1H), 7.26 (d, *J* = 8.0 Hz, 2H), 7.15 (d, *J* = 6.8 Hz, 1H), 7.12 (d, *J* = 8.0 Hz, 2H), 7.05 (d, *J* = 7.6 Hz, 2H), 6.93 (d, *J* = 8.0 Hz, 2H), 6.69 (d, *J* = 8.0 Hz, 1H), 5.82 (d, *J* = 12.4 Hz, 1H),

4.58 – 4.47 (m, 3H), 4.04 (td, *J* = 8.8, 5.2 Hz, 1H), 3.89 (dt, *J* = 8.8, 8.4 Hz, 1H), 3.41 (td, *J* = 8.4, 5.6 Hz, 1H), 3.26 (dt, *J* = 9.2, 8.4 Hz, 1H), 3.20 – 3.09 (m, 2H), 2.26 (s, 3H), 2.16 (s, 3H);

**<sup>13</sup>C NMR** (100 MHz, CDCl<sub>3</sub>): δ 159.1, 158.0, 138.9, 137.6, 135.9, 134.2, 134.1, 129.4, 129.4, 128.3, 127.9, 127.7, 127.3, 123.9, 109.1, 71.4, 61.9, 59.0, 51.4, 40.2, 29.9, 21.2, 21.0.

**HRMS (ESI)**: [M+H]<sup>+</sup> Calcd for C<sub>27</sub>H<sub>28</sub>NO<sub>3</sub><sup>+</sup>: 414.2064; found: 414.2055.

**HPLC** (Chiralcel AD-H): *n*-Hexane/EtOH = 90/10, flow rate 1.0 mL/min, T = 40 °C, λ = 210 nm, t<sub>R</sub> = 19.891 min (major), t<sub>R</sub> = 16.525 min (minor); 97% ee.

<Chromatogram>

uv

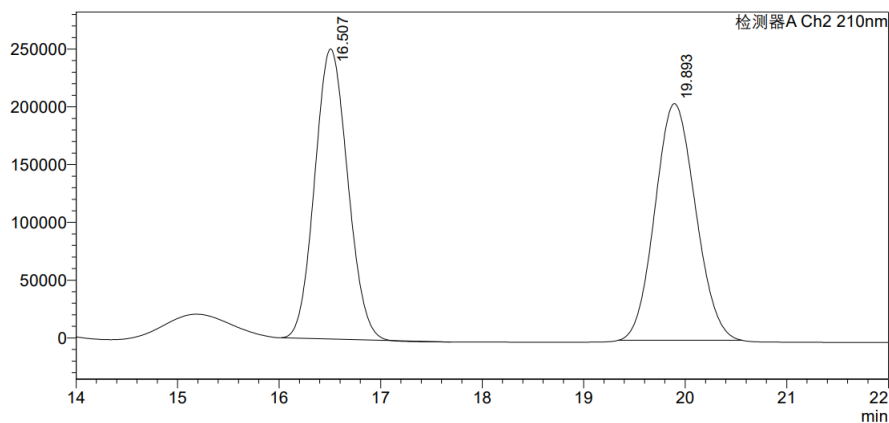

<Peak Table>

| Peak# | Ret. Time | Area     | Height | Conc.  | Unit | Mark |
|-------|-----------|----------|--------|--------|------|------|
| 1     | 16.507    | 5650982  | 251060 | 49.813 |      | M    |
| 2     | 19.893    | 5693333  | 204838 | 50.187 |      | M    |
| 总计    |           | 11344315 | 455898 |        |      |      |

<Chromatogram>

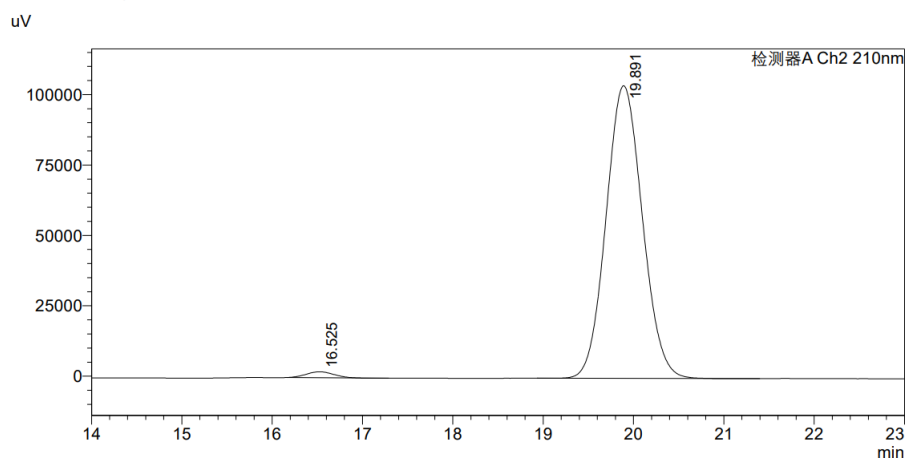

<Peak Table>

| Peak# | Ret. Time | Area    | Height | Conc.  | Unit | Mark |
|-------|-----------|---------|--------|--------|------|------|
| 1     | 16.525    | 44758   | 2104   | 1.517  |      | M    |
| 2     | 19.891    | 2906531 | 103952 | 98.483 |      | M    |
| 总计    |           | 2951289 | 106056 |        |      |      |

3-((1R,2R)-2-(thiophen-3-yl)-1,2-di-p-tolyethyl)oxazolidin-2-one (3t)

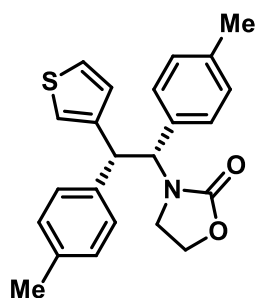

General procedure was followed on 0.2 mmol scale and purification by flash column chromatography on silica gel (PE/Et<sub>2</sub>O/CHCl<sub>2</sub> = 6/1/1) afforded **3t** as a white solid (55.1 mg, 73%). R<sub>f</sub> = 0.44 (PE/Et<sub>2</sub>O/CHCl<sub>2</sub> = 3/1/1);

[ $\alpha$ ]<sub>D</sub><sup>29.1</sup> = - 81.82 (c = 0.25, CHCl<sub>2</sub>);

<sup>1</sup>H NMR (400 MHz, CDCl<sub>3</sub>): 7.29 – 7.24 (m, 4H), 7.17 – 7.16 (m, 1H), 7.3 (d, J = 8.0 Hz, 2H), 7.05 (d, J = 7.6 Hz, 2H), 6.94 (d, J = 8.0 Hz, 2H), 5.77 (d, J = 12.4 Hz, 1H), 4.80 (d, J = 12.4 Hz, 1H), 4.05 (td, J = 8.4, 5.2 Hz, 1H), 3.92 (dt, J = 8.8, 8.4 Hz, 1H), 3.44 (td, J = 8.4, 5.2 Hz, 1H), 3.30 (dt, J = 9.2, 8.0 Hz, 1H), 2.26

(s, 3H), 2.17 (s, 3H);

<sup>13</sup>C NMR (100 MHz, CDCl<sub>3</sub>):  $\delta$  157.9, 142.6, 137.9, 137.6, 136.1, 133.9, 129.4, 129.3, 128.2, 128.0, 127.1, 126.3, 120.6, 61.9, 59.7, 47.4, 40.3, 21.2, 21.0.

**HRMS (ESI):** [M+H]<sup>+</sup> Calcd for C<sub>23</sub>H<sub>23</sub>NO<sub>2</sub>SNa<sup>+</sup>: 400.1342; found: 400.1344.

**HPLC** (Chiralcel AD-H): n-Hexane/EtOH = 90/10, flow rate 1.0 mL/min, T = 40 °C,  $\lambda$  = 210 nm, t<sub>R</sub> = 15.673 min (major), t<sub>R</sub> = 20.746 min (minor); 82% ee.

<Chromatogram>

mV

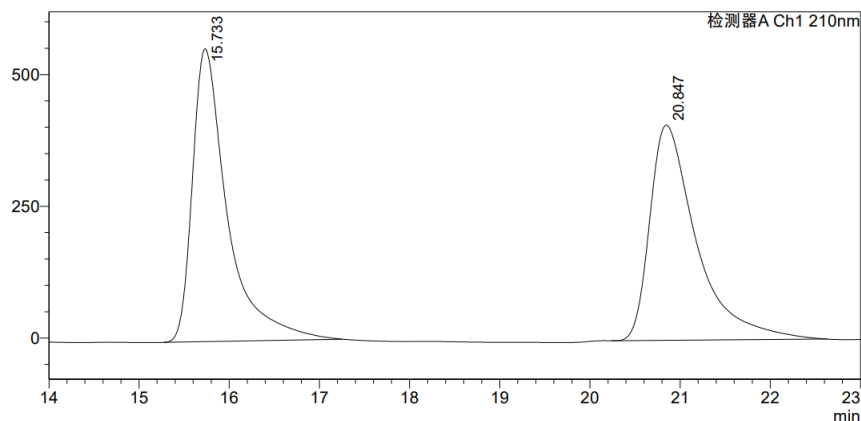

<Peak Table>

| 检测器A Ch1 210nm |           |          |        |        |      |      |
|----------------|-----------|----------|--------|--------|------|------|
| Peak#          | Ret. Time | Area     | Height | Conc.  | Unit | Mark |
| 1              | 15.733    | 14981472 | 555724 | 50.459 |      | M    |
| 2              | 20.847    | 14708732 | 408239 | 49.541 |      | M    |
| 总计             |           | 29690204 | 963963 |        |      |      |

<Chromatogram>

mV

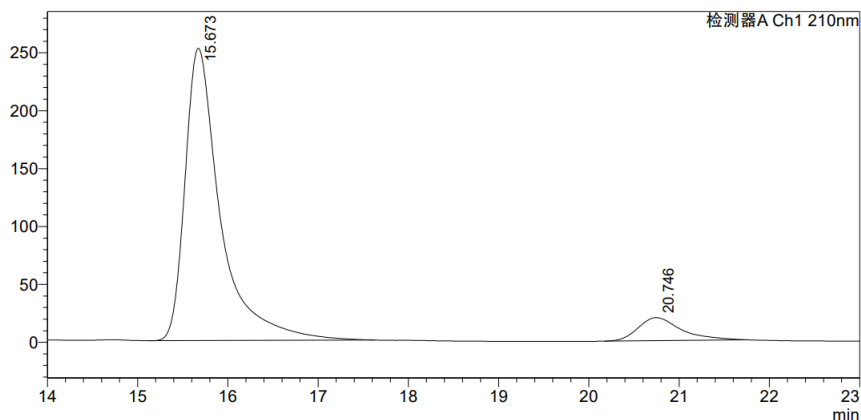

<Peak Table>

| 检测器A Ch1 210nm |           |         |        |        |      |      |
|----------------|-----------|---------|--------|--------|------|------|
| Peak#          | Ret. Time | Area    | Height | Conc.  | Unit | Mark |
| 1              | 15.673    | 6903259 | 252510 | 91.240 |      | M    |
| 2              | 20.746    | 662823  | 19940  | 8.760  |      | M    |
| 总计             |           | 7566082 | 272450 |        |      |      |

**tert-butyl ((1*R*,2*S*)-2-phenyl-1,2-di-*p*-tolylethyl)carbamate (**3u**)**

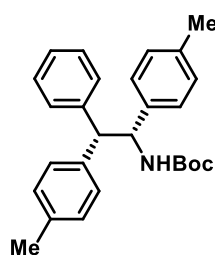

General procedure was followed on 0.2 mmol scale and purification by flash column chromatography on silica gel (PE/Et<sub>2</sub>O/CHCl<sub>3</sub>= 20/1/0.5~15/1/0.5) afforded **3u** as a white solid (29.4 mg, 37%). *R<sub>f</sub>* = 0.39 (PE/Et<sub>2</sub>O/CHCl<sub>3</sub>= 10/1/0.5);

$[\alpha]_D^{23.3} = +37.58$  (*c* = 0.11, CHCl<sub>2</sub>);

<sup>1</sup>H NMR (400 MHz, CDCl<sub>3</sub>): 7.28 – 7.24 (m, 4H), 7.19 – 7.15 (m, 1H), 7.00 – 6.98 (m, 6H), 6.93 (d, *J* = 8.0 Hz, 2H), 5.41 (bs, 1H), 4.78 (bs, 1H), 4.17 (d, *J* = 9.6 Hz, 1H), 2.25 (s, 3H), 2.20 (s, 3H), 1.28 (s, 9H);

<sup>13</sup>C NMR (100 MHz, CDCl<sub>3</sub>): δ 155.1, 138.9, 136.5, 135.9, 129.1, 128.9, 128.9, 128.6, 128.4, 127.1, 126.8, 77.2, 57.8, 28.4, 21.2, 21.1.

HRMS (ESI): [M+H]<sup>+</sup> Calcd for C<sub>27</sub>H<sub>32</sub>NO<sub>2</sub>: 402.2428; found: 402.2425.

**HPLC** (Chiralcel AS-H): *n*-Hexane/EtOH = 90/10, flow rate 1.0 mL/min,  $\lambda$  = 210 nm,  $t_R$  = 4.325 min (major),  $t_R$  = 5.706 min (minor); 75% ee.

<Chromatogram>

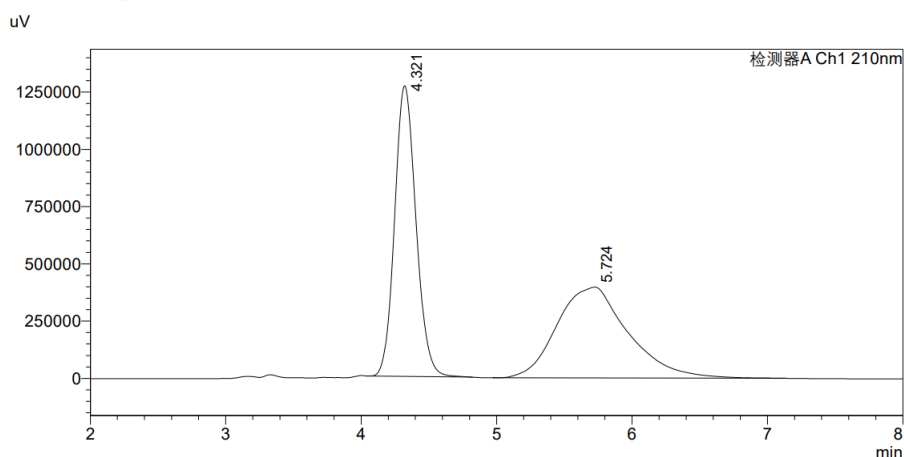

<Peak Table>

| 检测器A Ch1 210nm |           |          |         |        |      |      |
|----------------|-----------|----------|---------|--------|------|------|
| Peak#          | Ret. Time | Area     | Height  | Conc.  | Unit | Mark |
| 1              | 4.321     | 13957639 | 1267410 | 49.034 |      | M    |
| 2              | 5.724     | 14507306 | 396755  | 50.966 |      | M    |
| 总计             |           | 28464945 | 1664165 |        |      |      |

<Chromatogram>

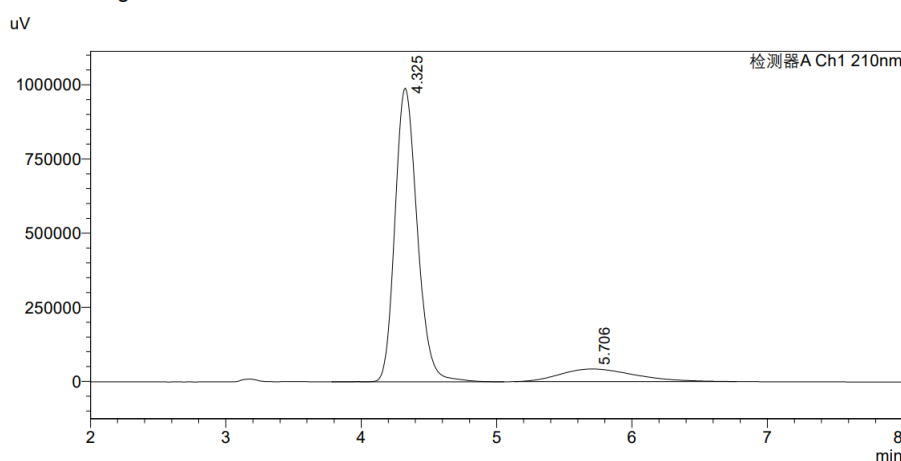

<Peak Table>

| 检测器A Ch1 210nm |           |          |         |        |      |      |
|----------------|-----------|----------|---------|--------|------|------|
| Peak#          | Ret. Time | Area     | Height  | Conc.  | Unit | Mark |
| 1              | 4.325     | 11373323 | 990187  | 87.504 |      | M    |
| 2              | 5.706     | 1624182  | 42539   | 12.496 |      | M    |
| 总计             |           | 12997505 | 1032727 |        |      |      |

**N-((1*R*,2*S*)-2-phenyl-1,2-di-*p*-tolylethyl)benzamide (3v)**

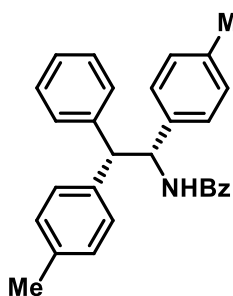

General procedure was followed on 0.2 mmol scale and purification by flash column chromatography on silica gel afforded **3v** as a white solid (13.8 mg, 17%).

$[\alpha]_D^{29.1} = +46.39$  ( $c = 0.24$ ,  $\text{CHCl}_2$ );

$^1\text{H NMR}$  (400 MHz,  $\text{CDCl}_3$ ): 7.41 (d,  $J = 7.6$  Hz, 3H), 7.36 (d,  $J = 7.2$  Hz, 1H), 7.28 (d,  $J = 7.2$  Hz, 2H), 7.26 – 7.14 (m, 4H), 7.06 (d,  $J = 8.0$  Hz, 4H), 6.99 – 6.94 (m, 4H), 6.33 (d,  $J = 8.4$  Hz, 1H), 5.94 (t,  $J = 8.8$  Hz, 1H), 4.38 (d,  $J = 9.6$  Hz, 1H), 2.22 (s, 3H), 2.20 (s, 3H);

<sup>13</sup>C NMR (100 MHz, CDCl<sub>3</sub>): δ 166.7, 141.4, 138.6, 138.4, 136.8, 136.2, 134.9, 131.4, 129.3, 129.1, 128.8, 128.7, 128.6, 128.3, 127.2, 127.1, 126.9, 77.2, 57.4, 55.9, 21.2, 21.1.

HRMS (ESI): [M+H]<sup>+</sup> Calcd for C<sub>29</sub>H<sub>28</sub>NO<sup>+</sup>: 406.2165; found: 406.2155.

HPLC (Chiralcel AD-H): *n*-Hexane/EtOH = 90/10, flow rate 1.0 mL/min, λ = 210 nm, t<sub>R</sub> = 19.333 min (major), t<sub>R</sub> = 12.380 min (minor); 97% ee.

<Chromatogram>

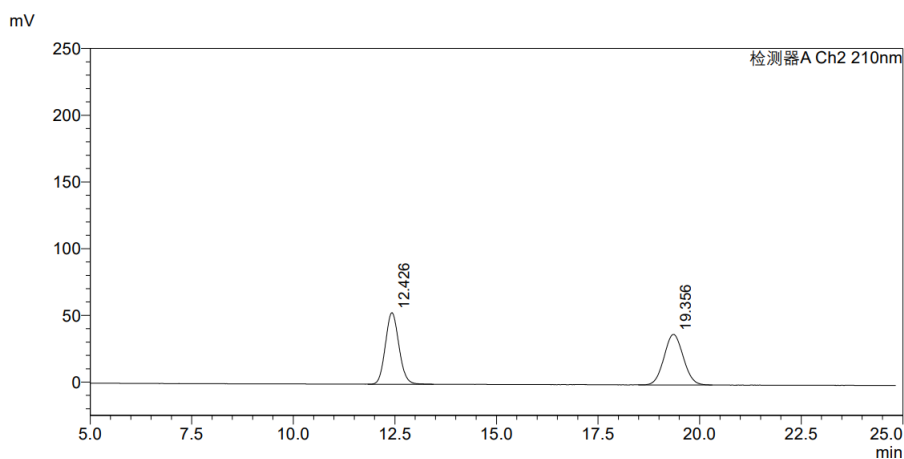

<Peak Table>

| 检测器A Ch2 210nm |           |         |        |        |      |      |
|----------------|-----------|---------|--------|--------|------|------|
| Peak#          | Ret. Time | Area    | Height | Conc.  | Unit | Mark |
| 1              | 12.426    | 1248030 | 53616  | 49.978 |      | V    |
| 2              | 19.356    | 1249124 | 37915  | 50.022 |      | V    |
| 总计             |           | 2497154 | 91531  |        |      |      |

<Chromatogram>

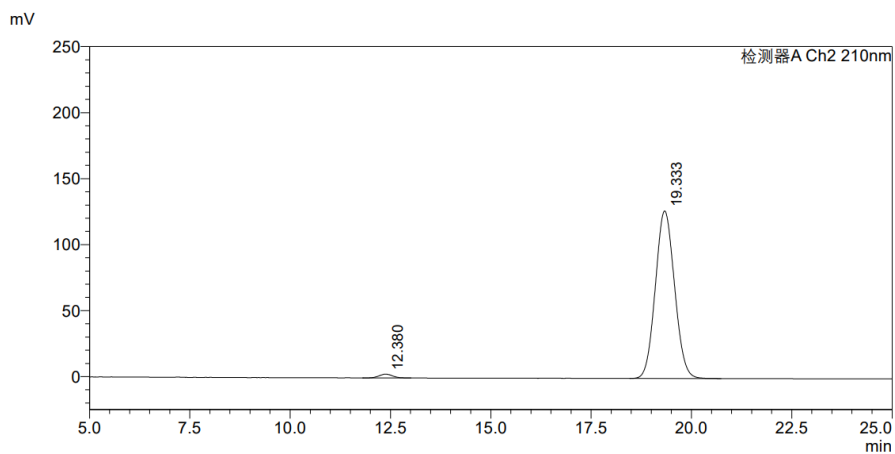

<Peak Table>

| 检测器A Ch2 210nm |           |         |        |        |      |      |
|----------------|-----------|---------|--------|--------|------|------|
| Peak#          | Ret. Time | Area    | Height | Conc.  | Unit | Mark |
| 1              | 12.380    | 69428   | 2939   | 1.615  |      | V    |
| 2              | 19.333    | 4229864 | 126987 | 98.385 |      | V    |
| 总计             |           | 4299292 | 129926 |        |      |      |

## X-Ray Diffraction Analysis of Compound 3b

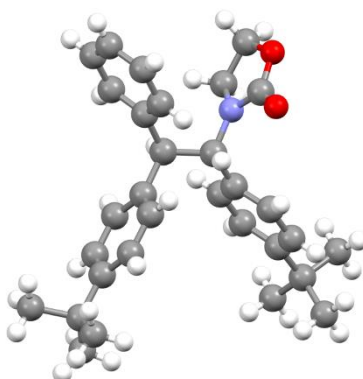

Fig. S1 Crystal data and structure refinement for **3b** (CCDC: 2109912)

|                                   |                                                  |          |
|-----------------------------------|--------------------------------------------------|----------|
| Empirical formula                 | C <sub>31</sub> H <sub>37</sub> N O <sub>2</sub> |          |
| Formula weight                    | 455.61                                           |          |
| Temperature                       | 293(2) K                                         |          |
| Wavelength                        | 1.54178 Å                                        |          |
| Crystal system                    | Orthorhombic                                     |          |
| Space group                       | P 21 21 21                                       |          |
| Unit cell dimensions              | a = 6.4789(5) Å                                  | a = 90°. |
|                                   | b = 18.2766(13) Å                                | b = 90°. |
|                                   | c = 22.8772(16) Å                                | c = 90°. |
| Volume                            | 2708.9(3) Å <sup>3</sup>                         |          |
| Z                                 | 4                                                |          |
| Density (calculated)              | 1.117 Mg/m <sup>3</sup>                          |          |
| Absorption coefficient            | 0.530 mm <sup>-1</sup>                           |          |
| F(000)                            | 984                                              |          |
| Crystal size                      | 0.150 x 0.110 x 0.060 mm <sup>3</sup>            |          |
| Theta range for data collection   | 3.095 to 70.239°.                                |          |
| Index ranges                      | -7<=h<=7, -22<=k<=19, -27<=l<=22                 |          |
| Reflections collected             | 19163                                            |          |
| Independent reflections           | 5098 [R(int) = 0.0636]                           |          |
| Completeness to theta = 67.679°   | 98.9 %                                           |          |
| Absorption correction             | Semi-empirical from equivalents                  |          |
| Max. and min. transmission        | 0.7533 and 0.4811                                |          |
| Refinement method                 | Full-matrix least-squares on F <sup>2</sup>      |          |
| Data / restraints / parameters    | 5098 / 42 / 343                                  |          |
| Goodness-of-fit on F <sup>2</sup> | 1.040                                            |          |
| Final R indices [I>2sigma(I)]     | R1 = 0.0539, wR2 = 0.1366                        |          |
| R indices (all data)              | R1 = 0.0689, wR2 = 0.1504                        |          |
| Absolute structure parameter      | -0.09(19)                                        |          |

Extinction coefficient

n/a

Largest diff. peak and hole

0.256 and -0.190 e.Å<sup>-3</sup>



## References

- (1) Y. Xi, C. Wang, Q. Zhang, J. Qu and Y. Chen, *Angew. Chem. Int. Ed.*, 2021, **60**, 2699.
- (2) Y. Xi, W. Huang, C. Wang, H. Ding, T. Xia, K. Fang, J. Qu and Y. Chen, *J. Am. Chem. Soc.*, 2022, **144**, 8389.
- (3) P. Li, N. Ma, Z. Wang, Q. Dai and C. Hu, *J. Org. Chem.*, 2018, **83**, 8233.
- (4) C. W. Cheung and S. L. Buchwald, *J. Org. Chem.*, 2012, **77**, 7526.
- (5) T. B. Nguyen, A. Martel, R. Dhal and G. Dujardin, *J. Org. Chem.*, 2008, **73**, 2621.
- (6) A. H. Cherney and S. E. Reisman, *J. Am. Chem. Soc.*, 2014, **136**, 14365.

## NMR Spectrum

$^1\text{H}$  NMR-spectrum (400 MHz,  $\text{CDCl}_3$ ) of **1t**

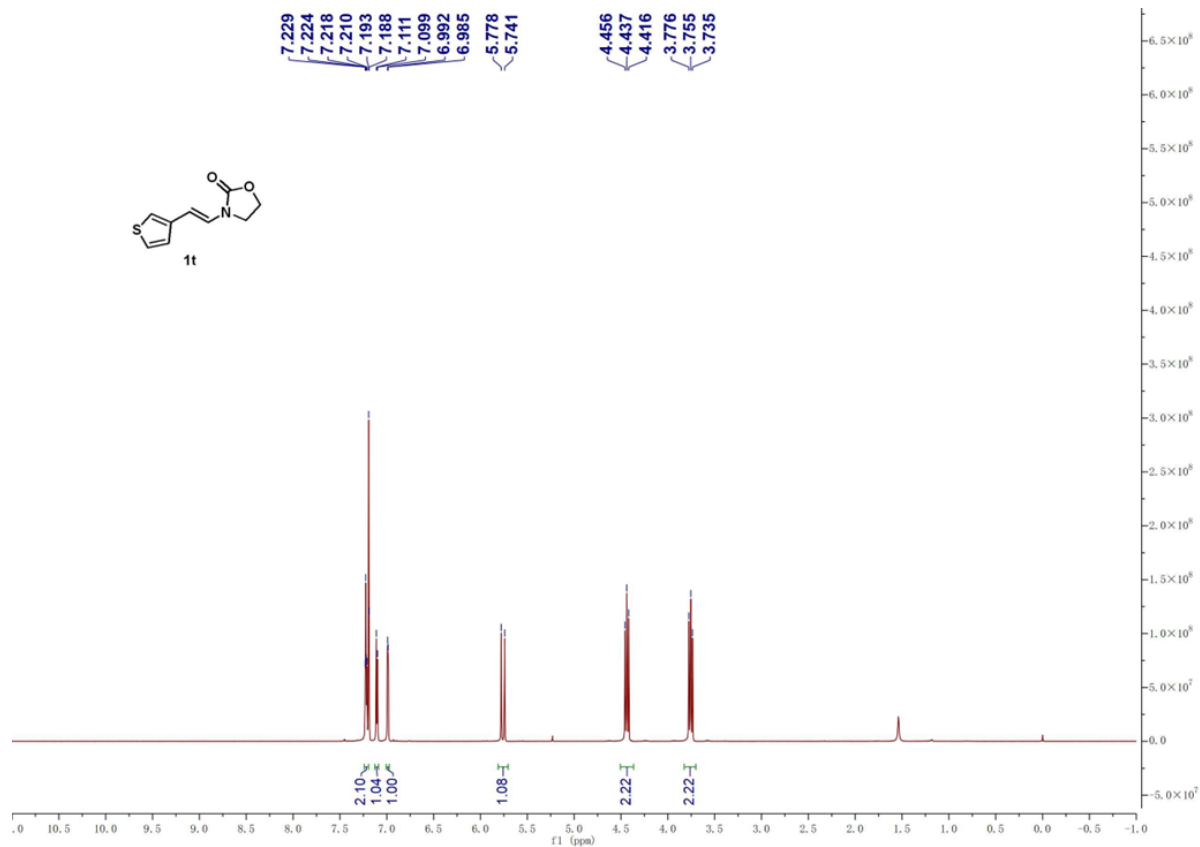

$^{13}\text{C}$  NMR-spectrum (100 MHz,  $\text{CDCl}_3$ ) of **1t**

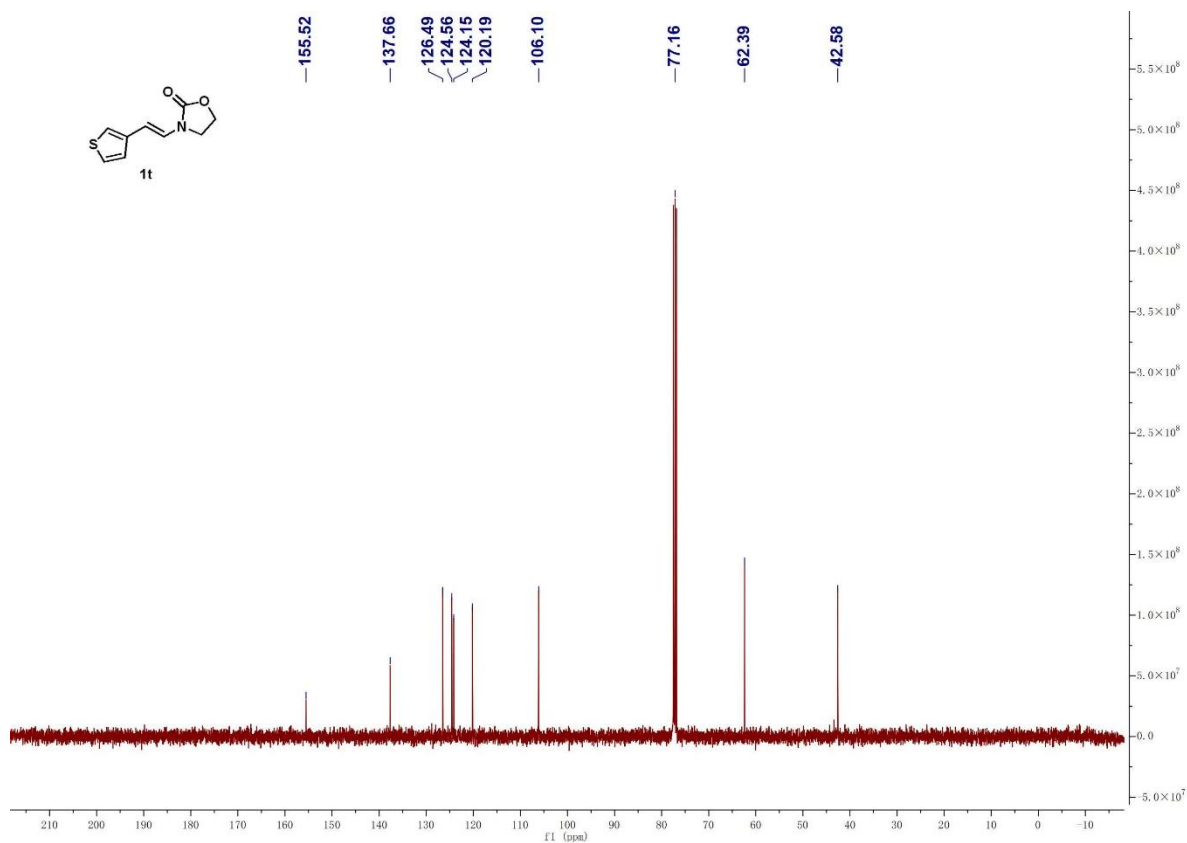

**<sup>1</sup>H NMR-spectrum (400 MHz, CDCl<sub>3</sub>) of 3a**

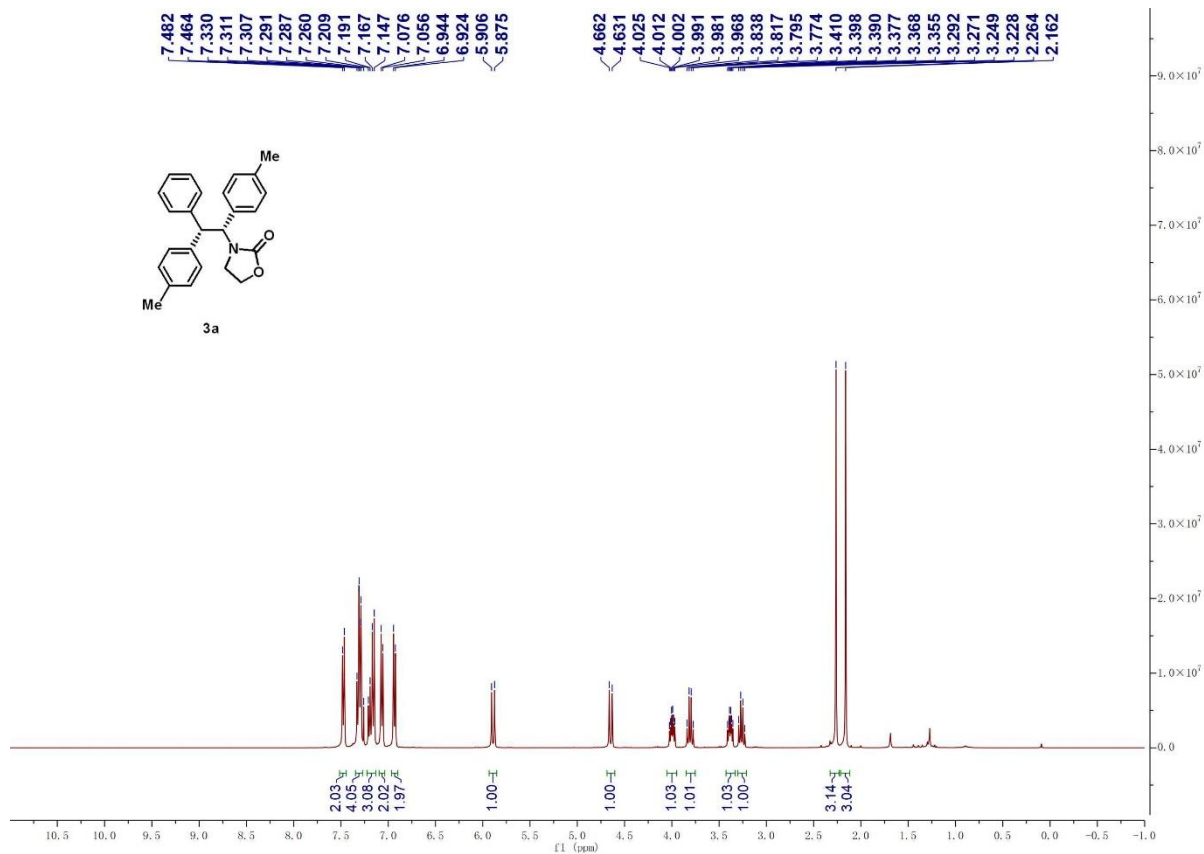

**<sup>13</sup>C NMR-spectrum (100 MHz, CDCl<sub>3</sub>) of 3a**

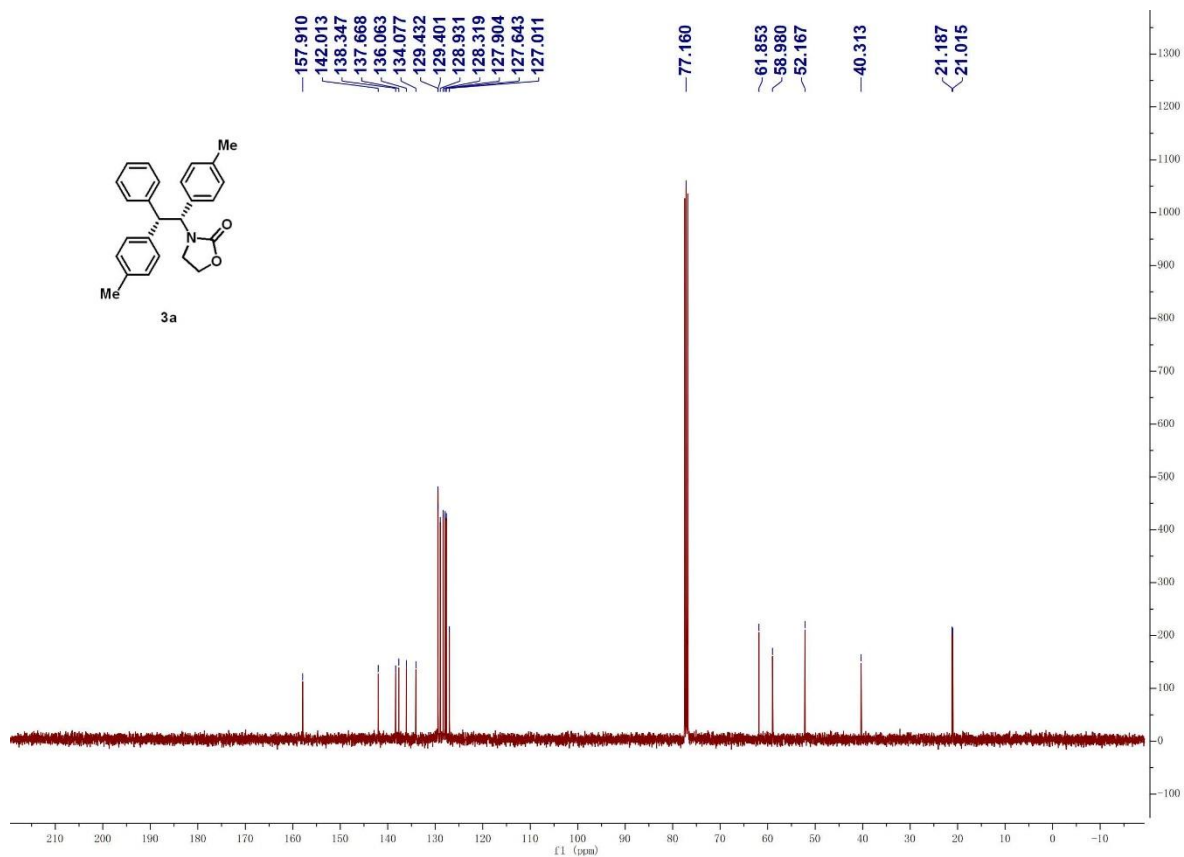

### $^1\text{H}$ NMR-spectrum (400 MHz, $\text{CDCl}_3$ ) of **3b**

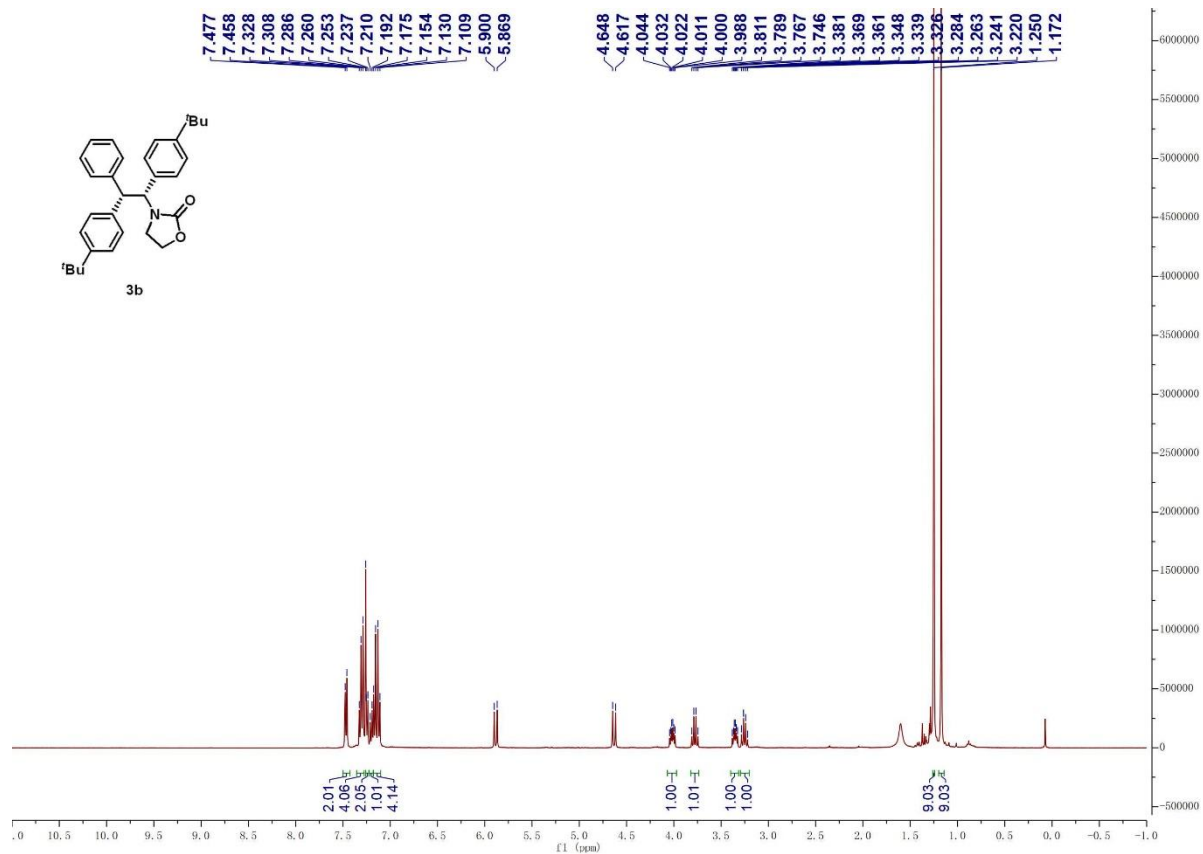

### $^{13}\text{C}$ NMR-spectrum (100 MHz, $\text{CDCl}_3$ ) of **3b**

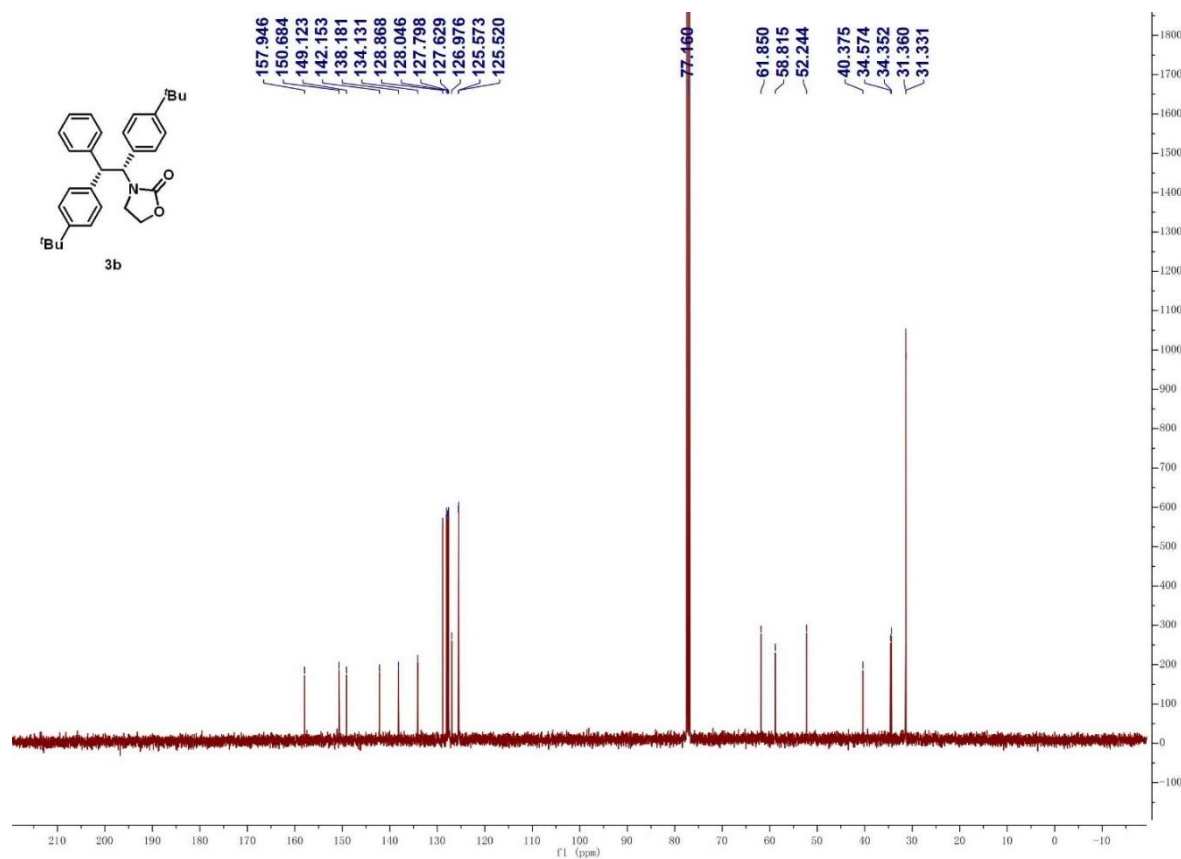

### $^1\text{H}$ NMR-spectrum (400 MHz, $\text{CDCl}_3$ ) of **3c**

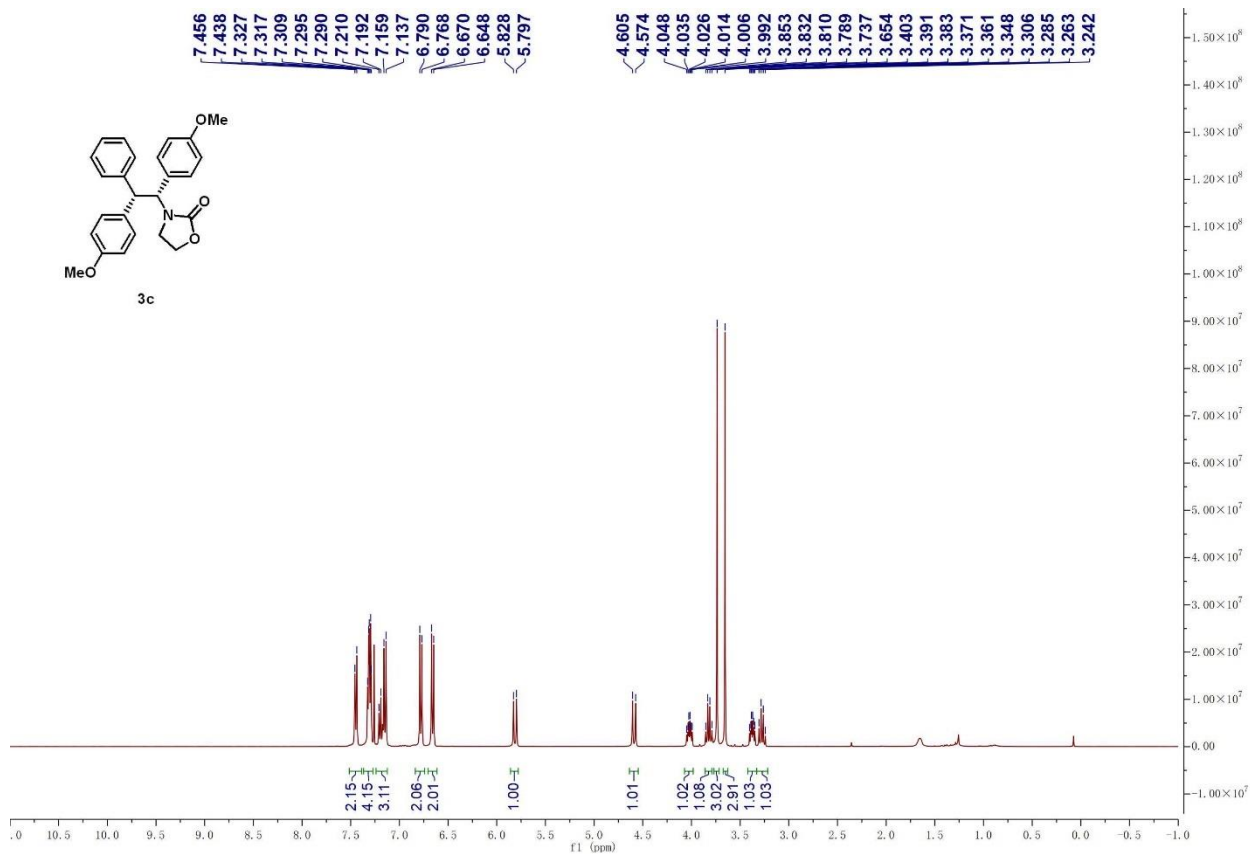

### $^{13}\text{C}$ NMR-spectrum (100 MHz, $\text{CDCl}_3$ ) of **3c**

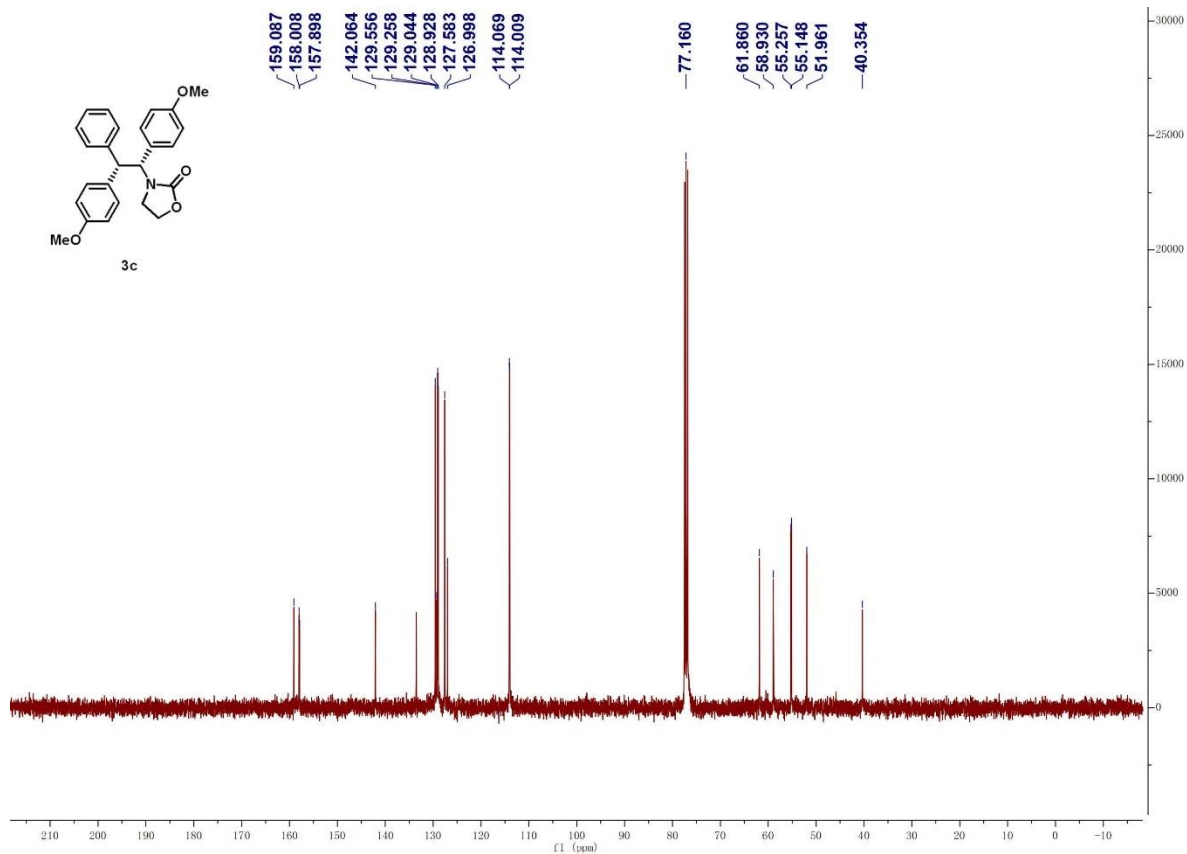

<sup>1</sup>H NMR-spectrum (400 MHz, CDCl<sub>3</sub>) of **3d**

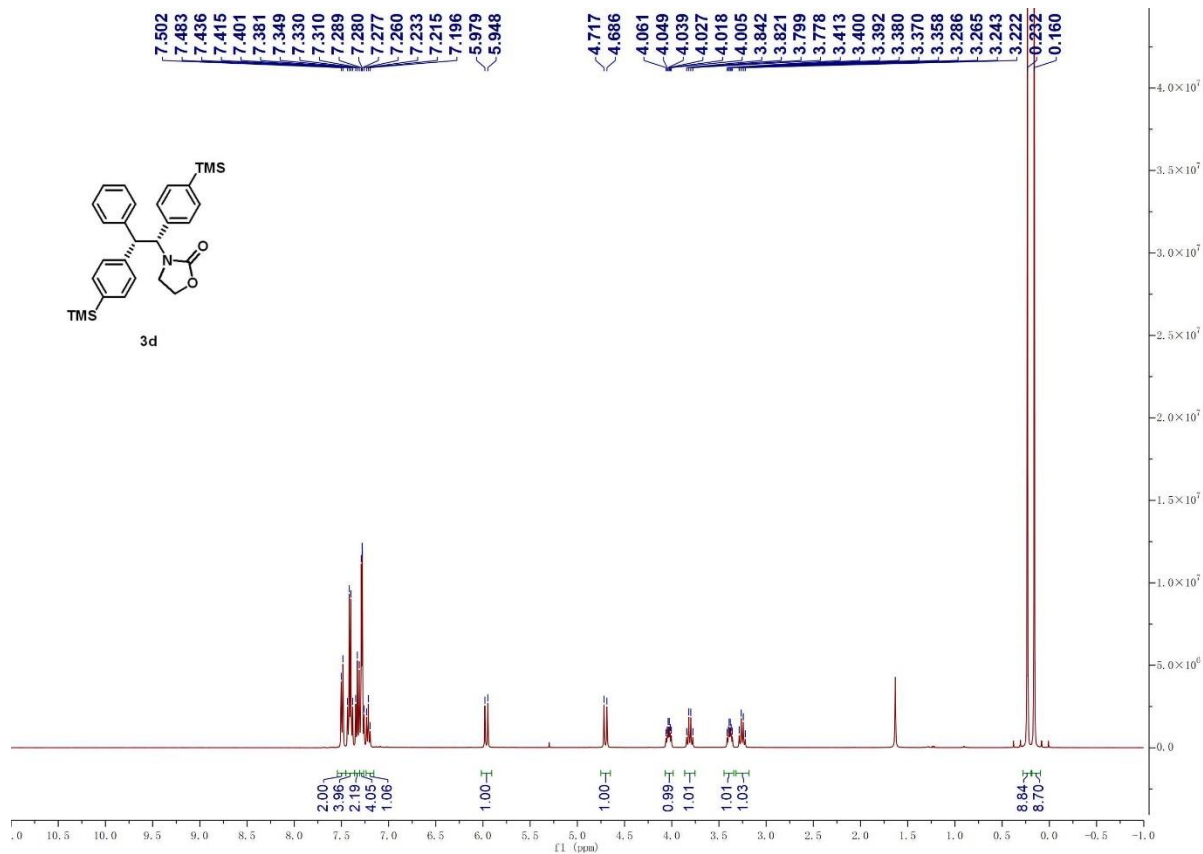

<sup>13</sup>C NMR-spectrum (100 MHz, CDCl<sub>3</sub>) of **3d**

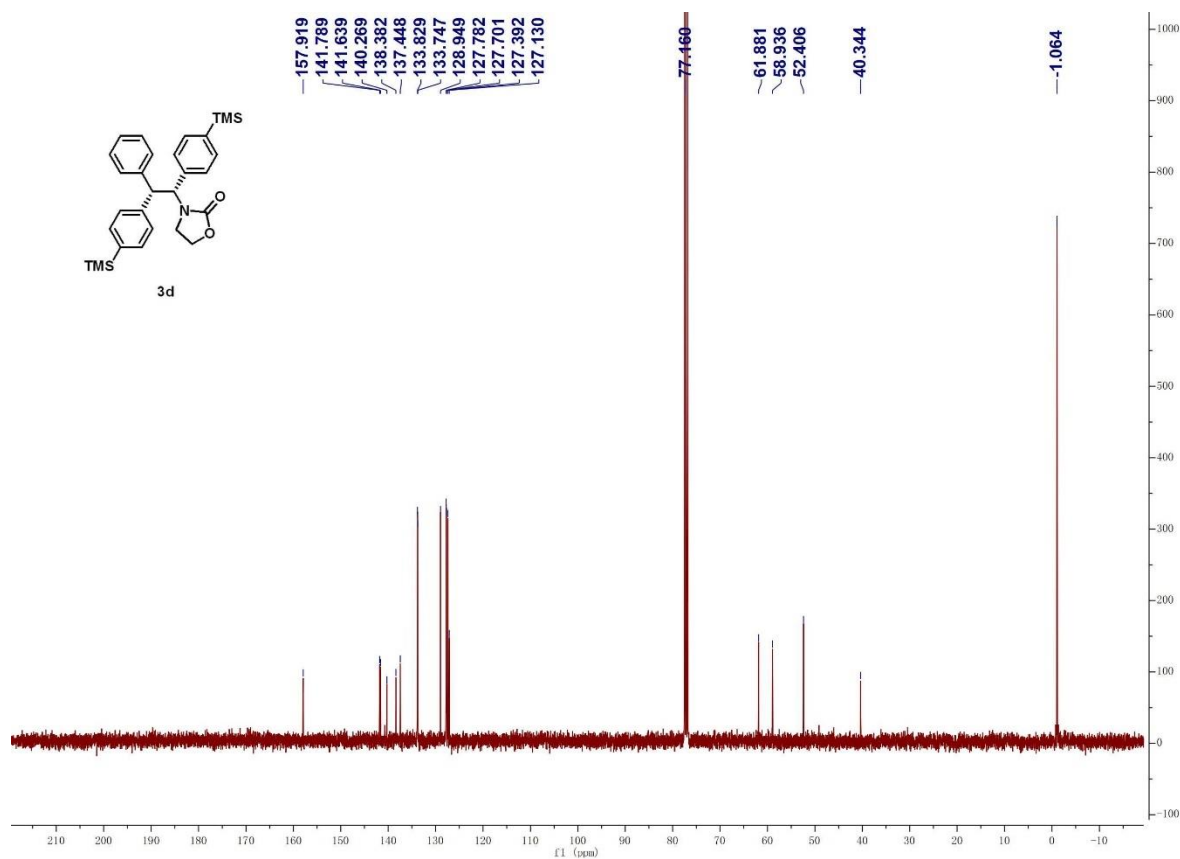

### <sup>1</sup>H NMR-spectrum (400 MHz, CDCl<sub>3</sub>) of **3e**

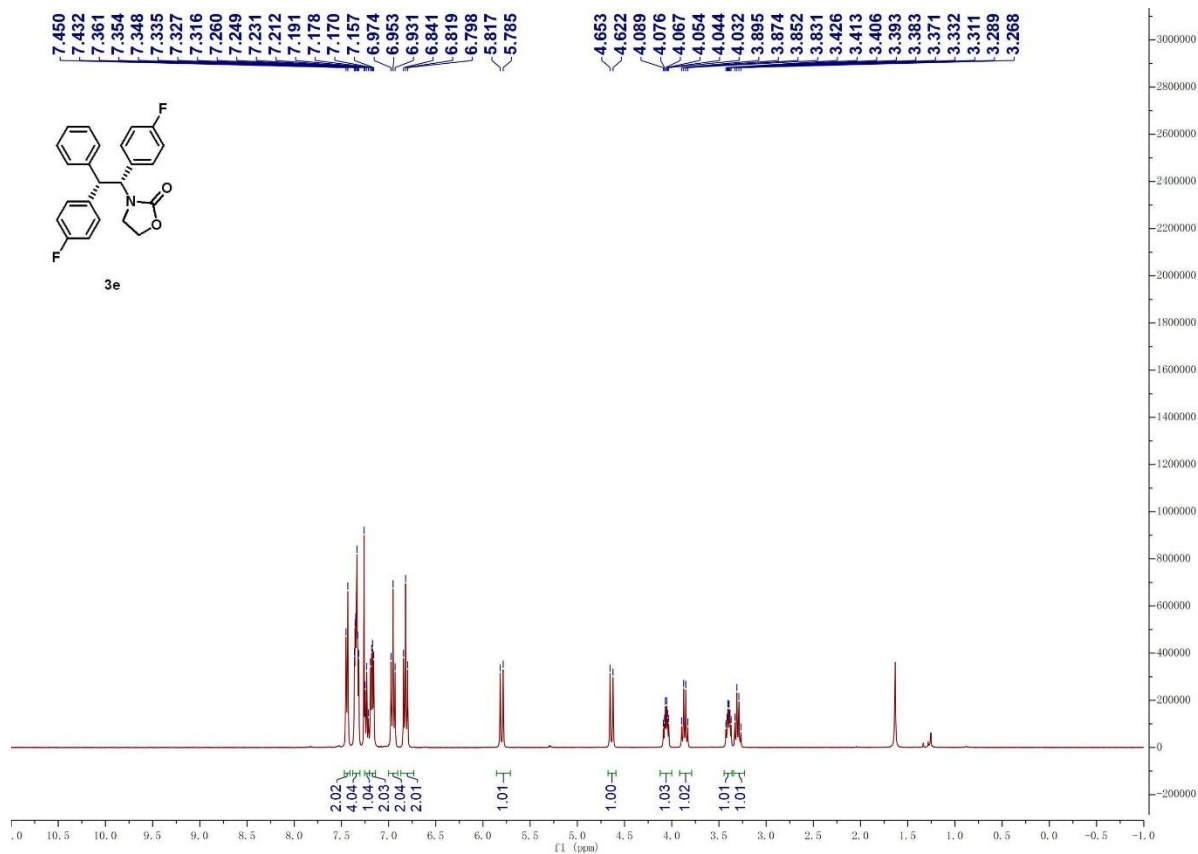

### <sup>13</sup>C NMR-spectrum (100 MHz, CDCl<sub>3</sub>) of **3e**

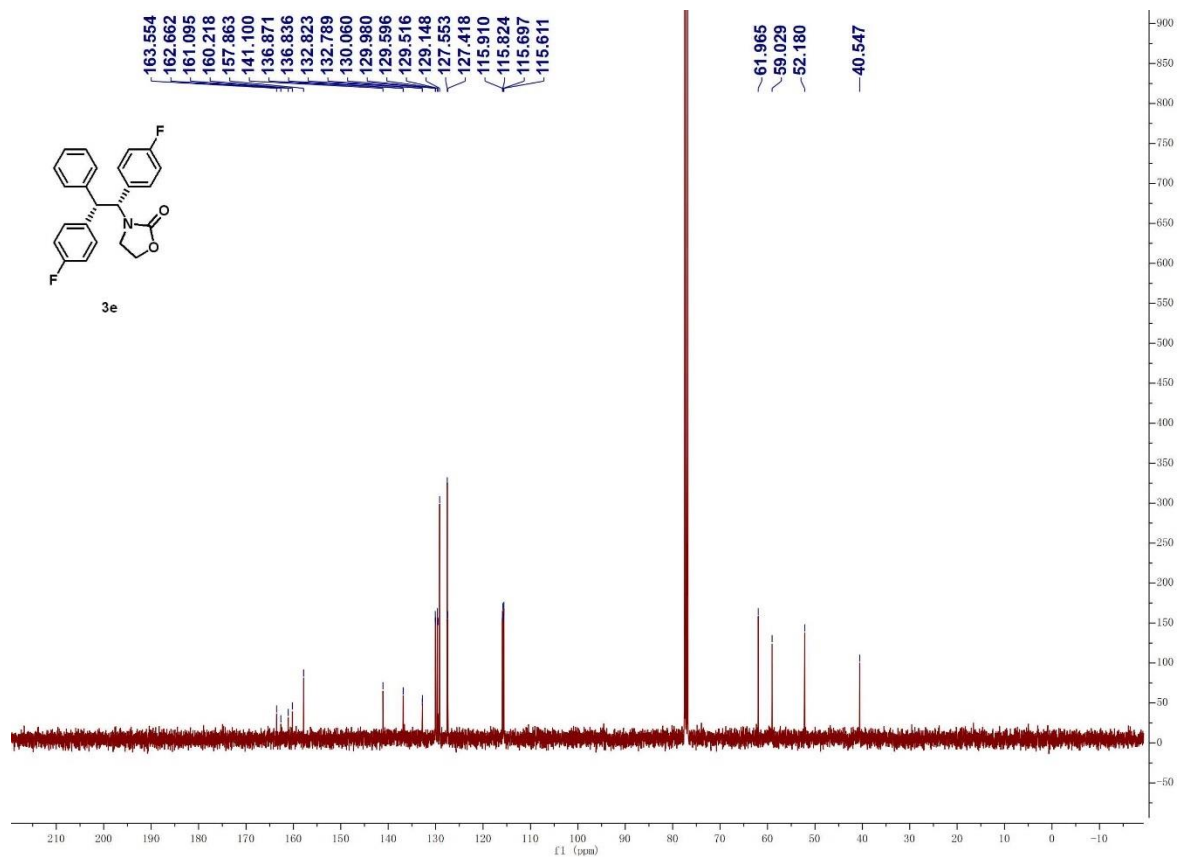

<sup>19</sup>F NMR-spectrum (376 MHz, CDCl<sub>3</sub>) of **3e**

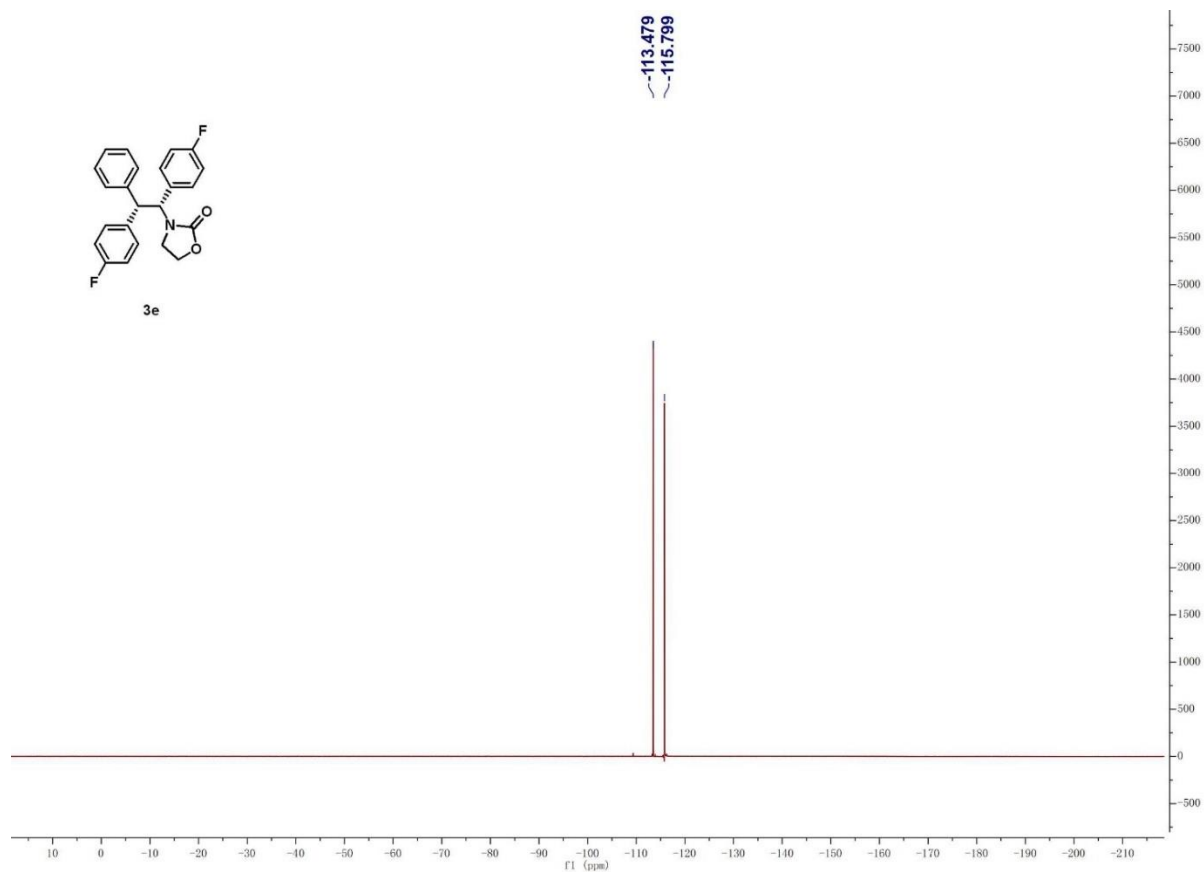



### <sup>1</sup>H NMR-spectrum (400 MHz, CDCl<sub>3</sub>) of **3f**

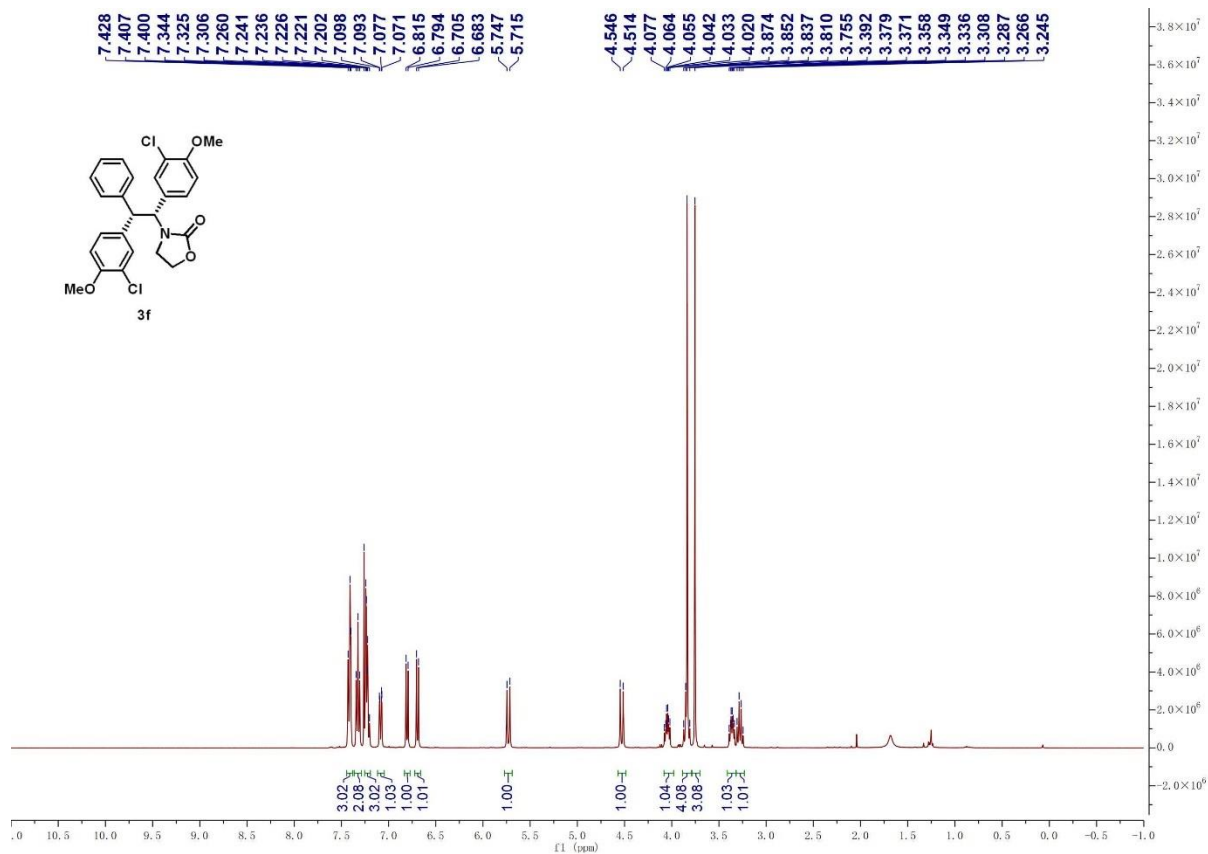

### <sup>13</sup>C NMR-spectrum (100 MHz, CDCl<sub>3</sub>) of **3f**

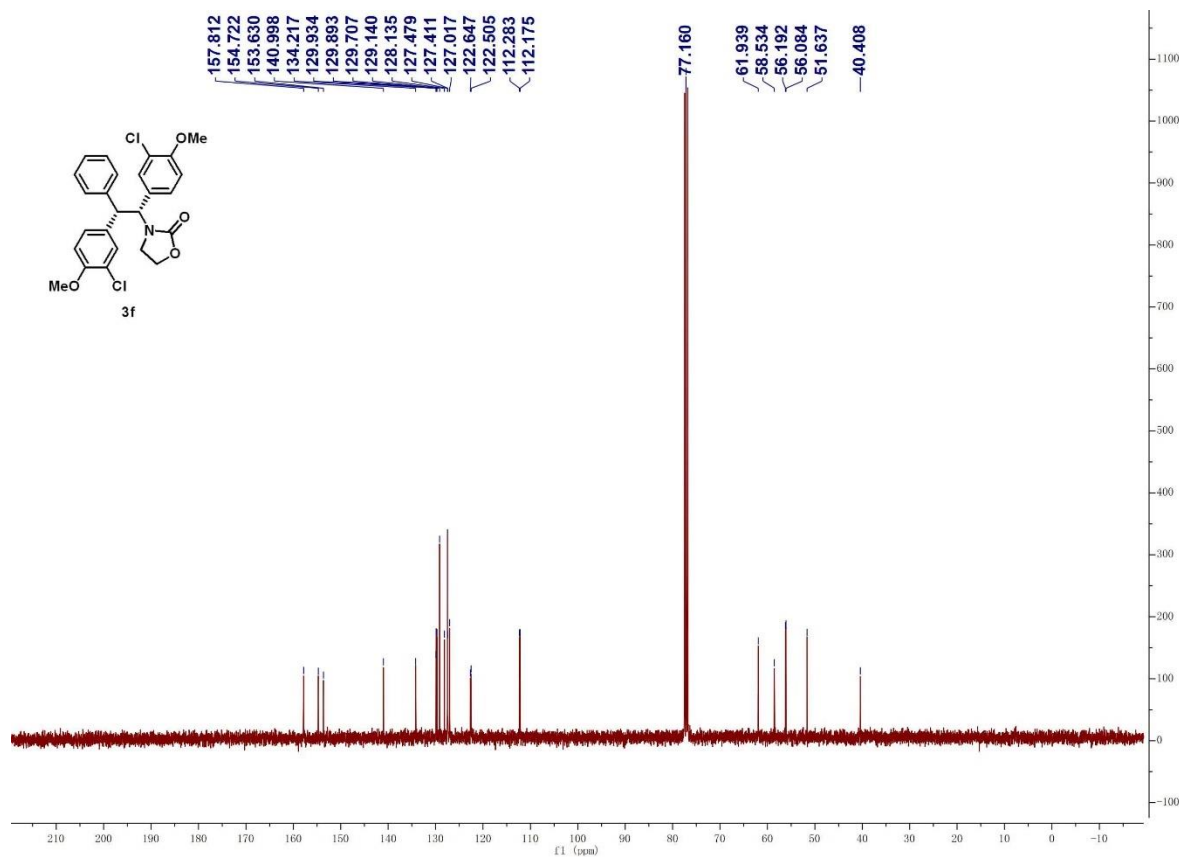

<sup>1</sup>H NMR-spectrum (400 MHz, CDCl<sub>3</sub>) of **3g**

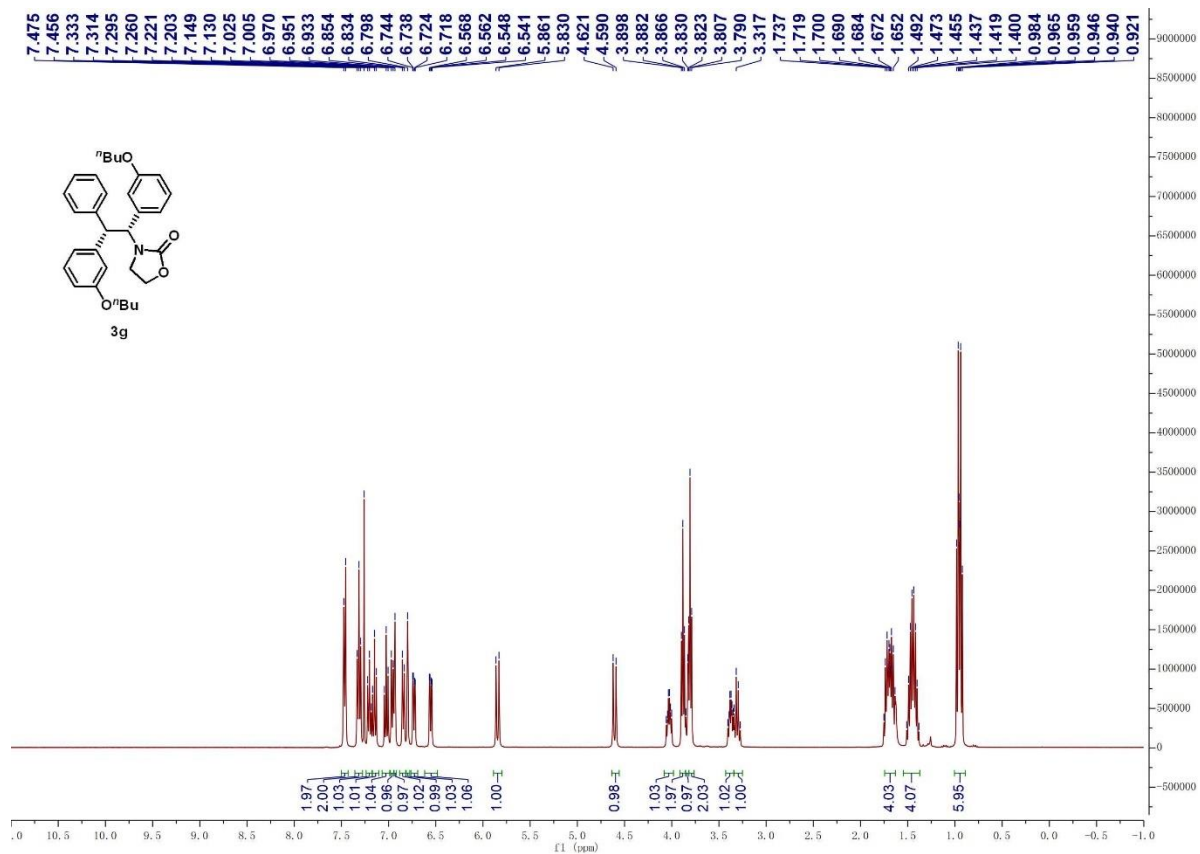

<sup>13</sup>C NMR-spectrum (100 MHz, CDCl<sub>3</sub>) of **3g**

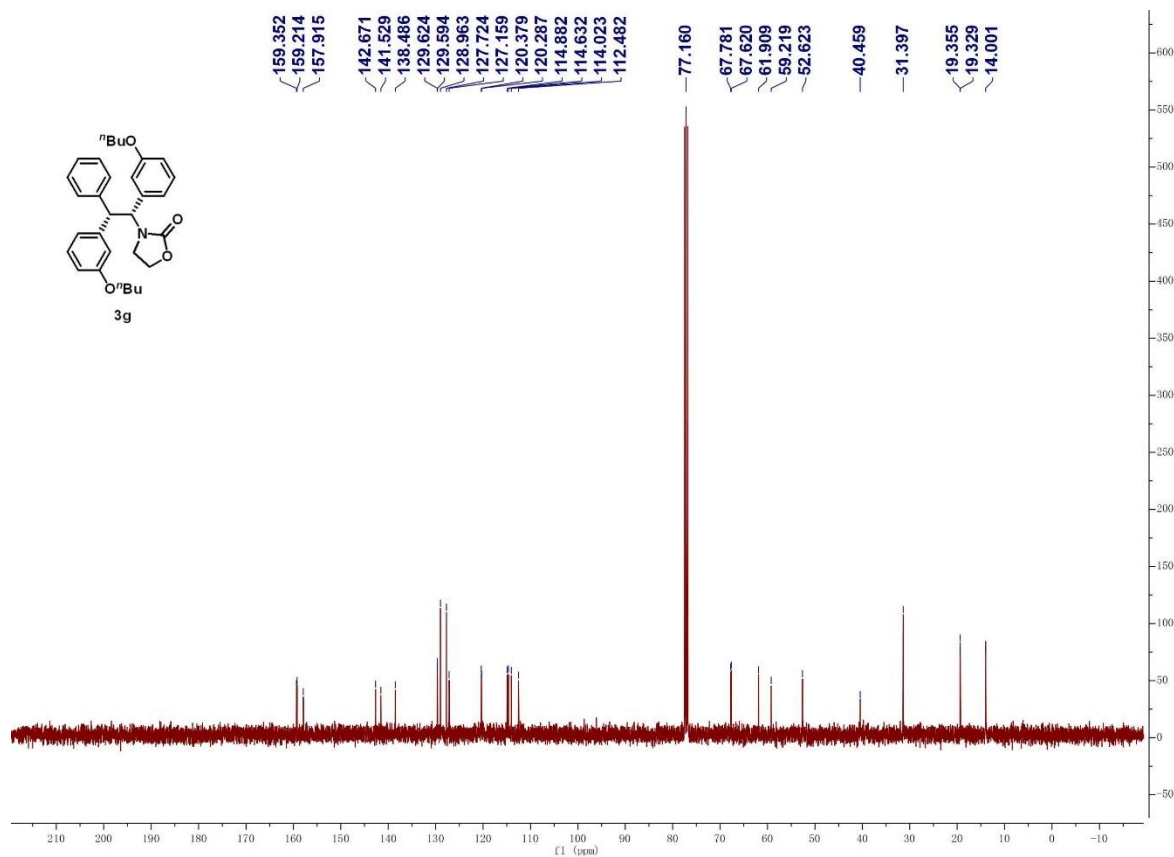

### $^1\text{H}$ NMR-spectrum (400 MHz, $\text{CDCl}_3$ ) of **3h**

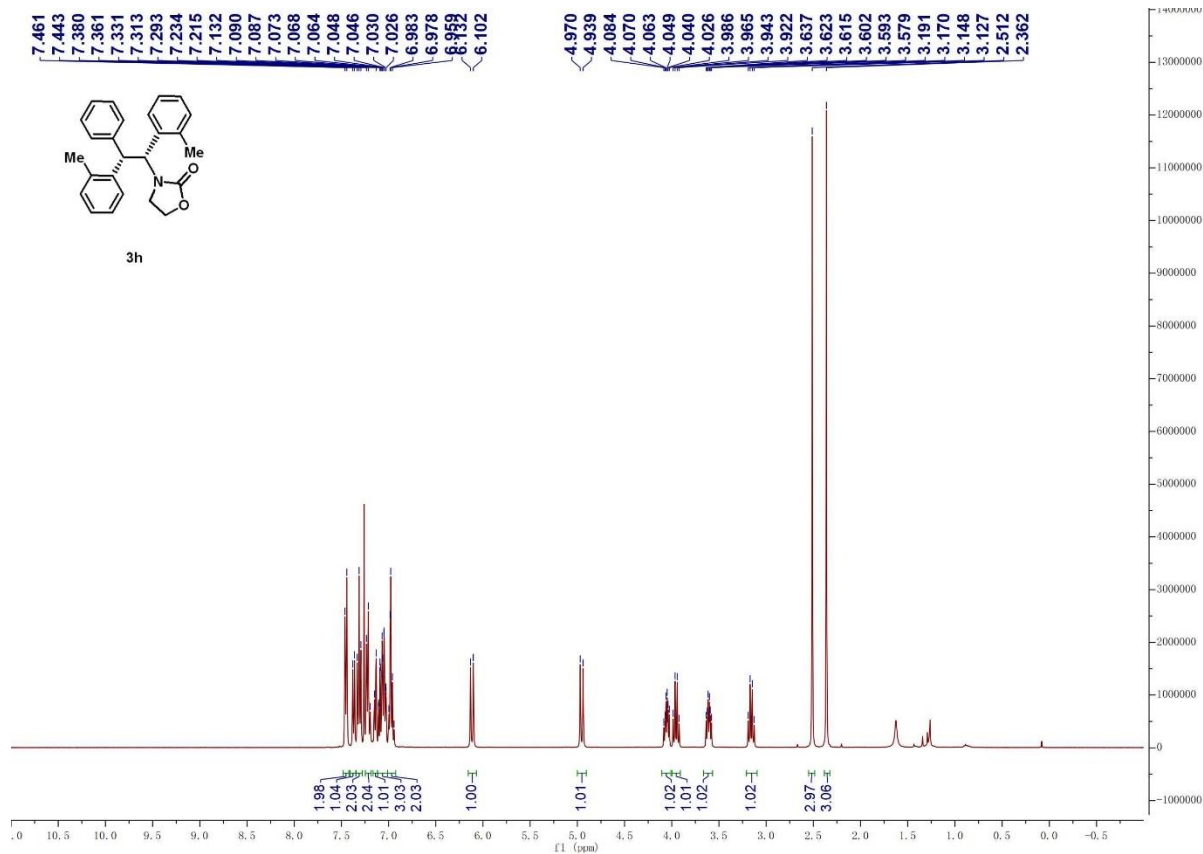

### $^{13}\text{C}$ NMR-spectrum (100 MHz, $\text{CDCl}_3$ ) of **3h**

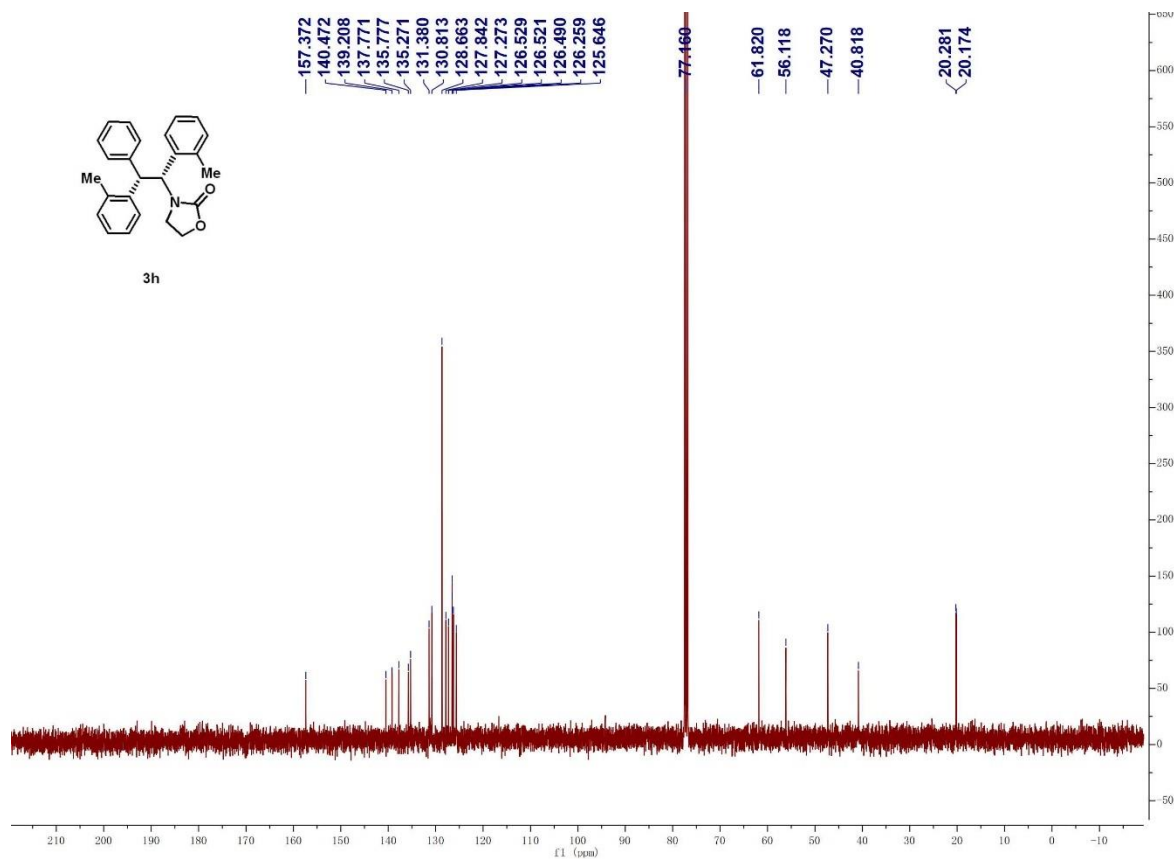

**<sup>1</sup>H NMR-spectrum (400 MHz, CDCl<sub>3</sub>) of 3i**

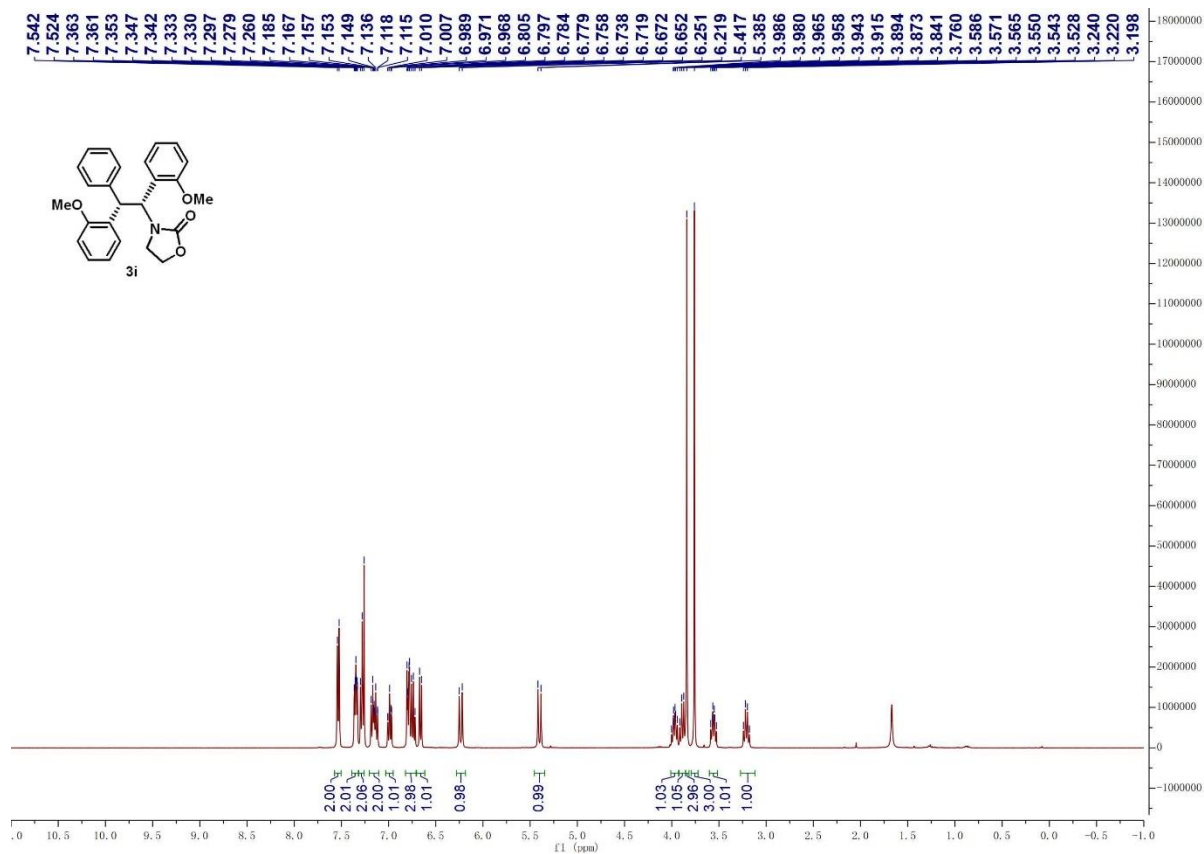

**<sup>13</sup>C NMR-spectrum (100 MHz, CDCl<sub>3</sub>) of 3i**

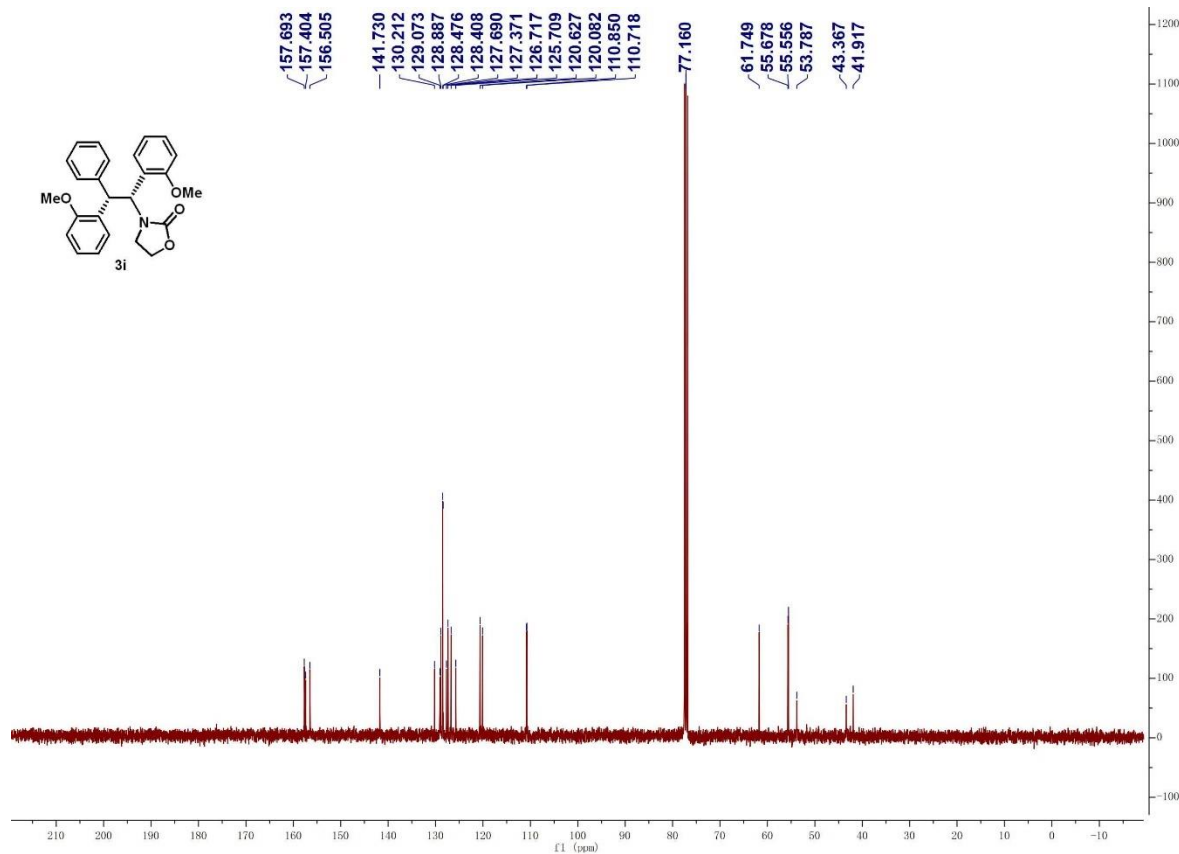

### $^1\text{H}$ NMR-spectrum (400 MHz, $\text{CDCl}_3$ ) of **3j**

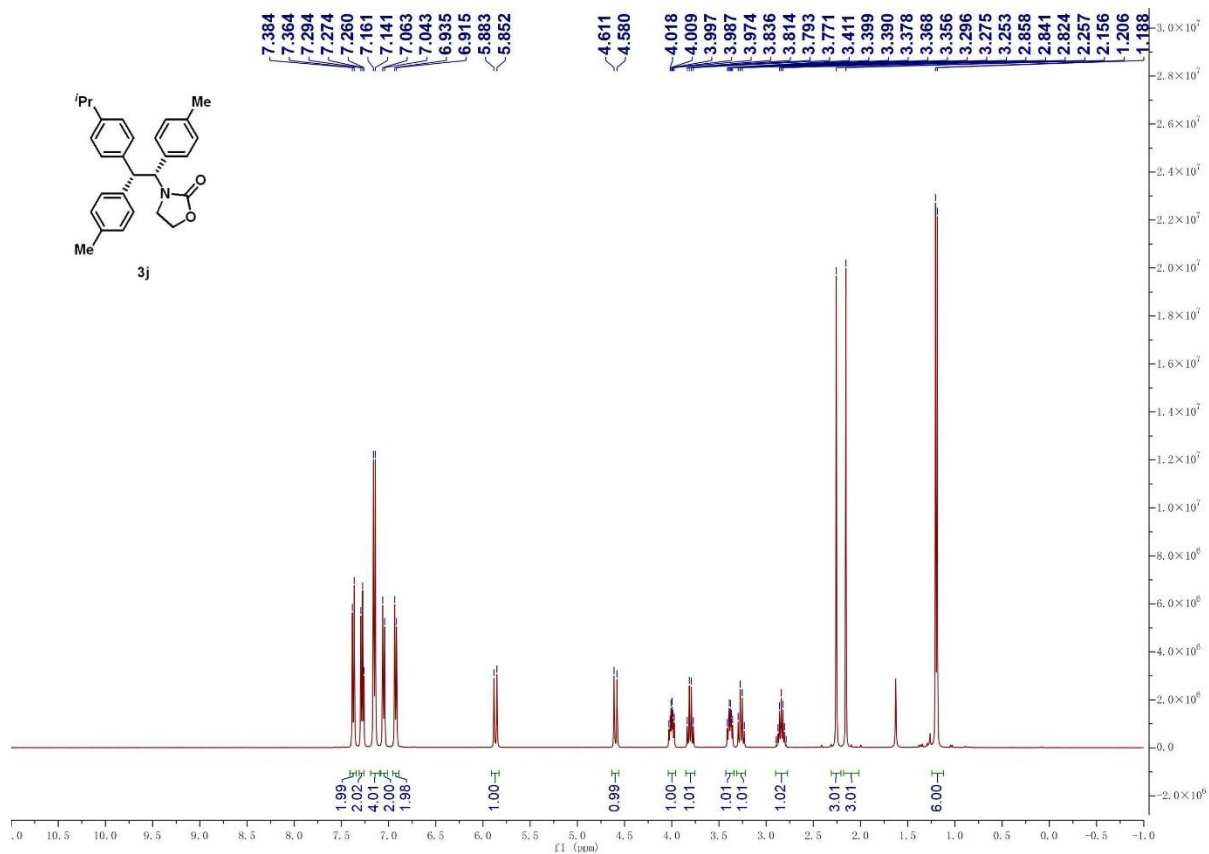

### $^{13}\text{C}$ NMR-spectrum (100 MHz, $\text{CDCl}_3$ ) of **3j**

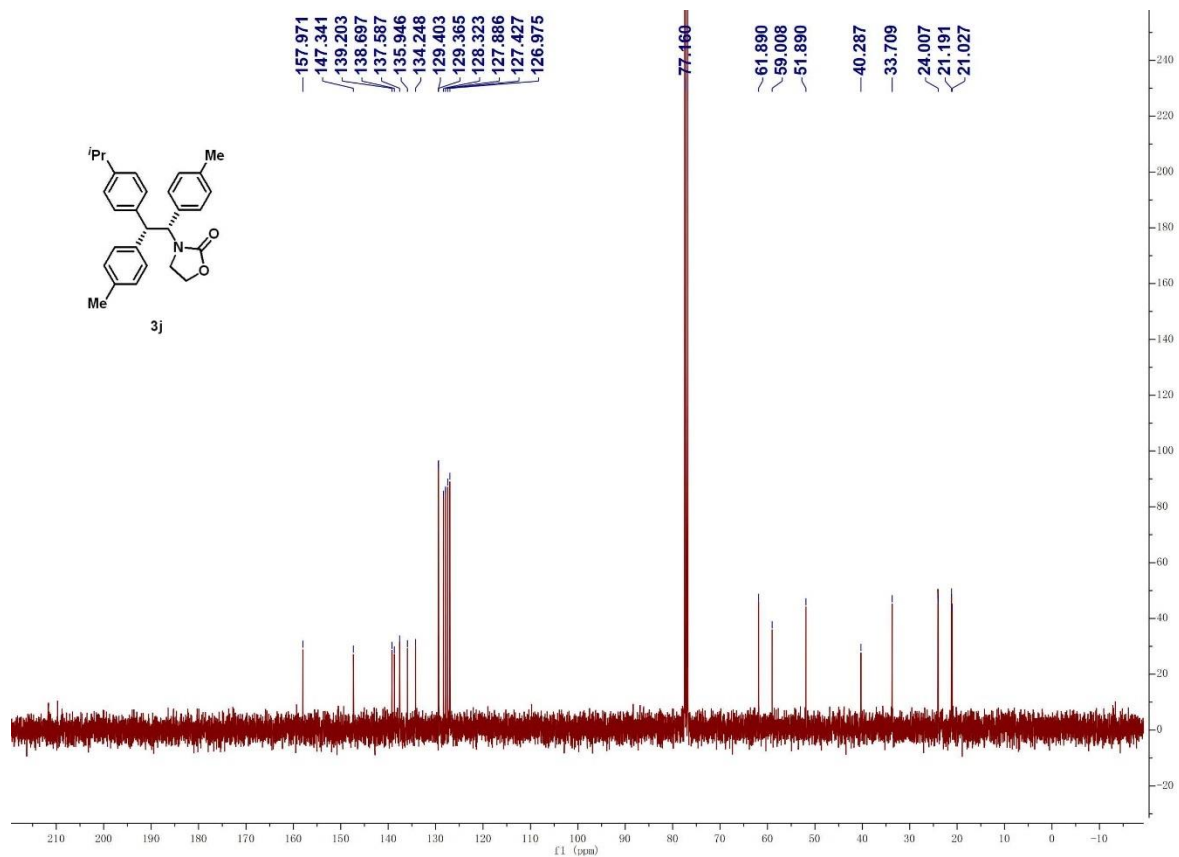

**<sup>1</sup>H NMR-spectrum (400 MHz, CDCl<sub>3</sub>) of 3k**

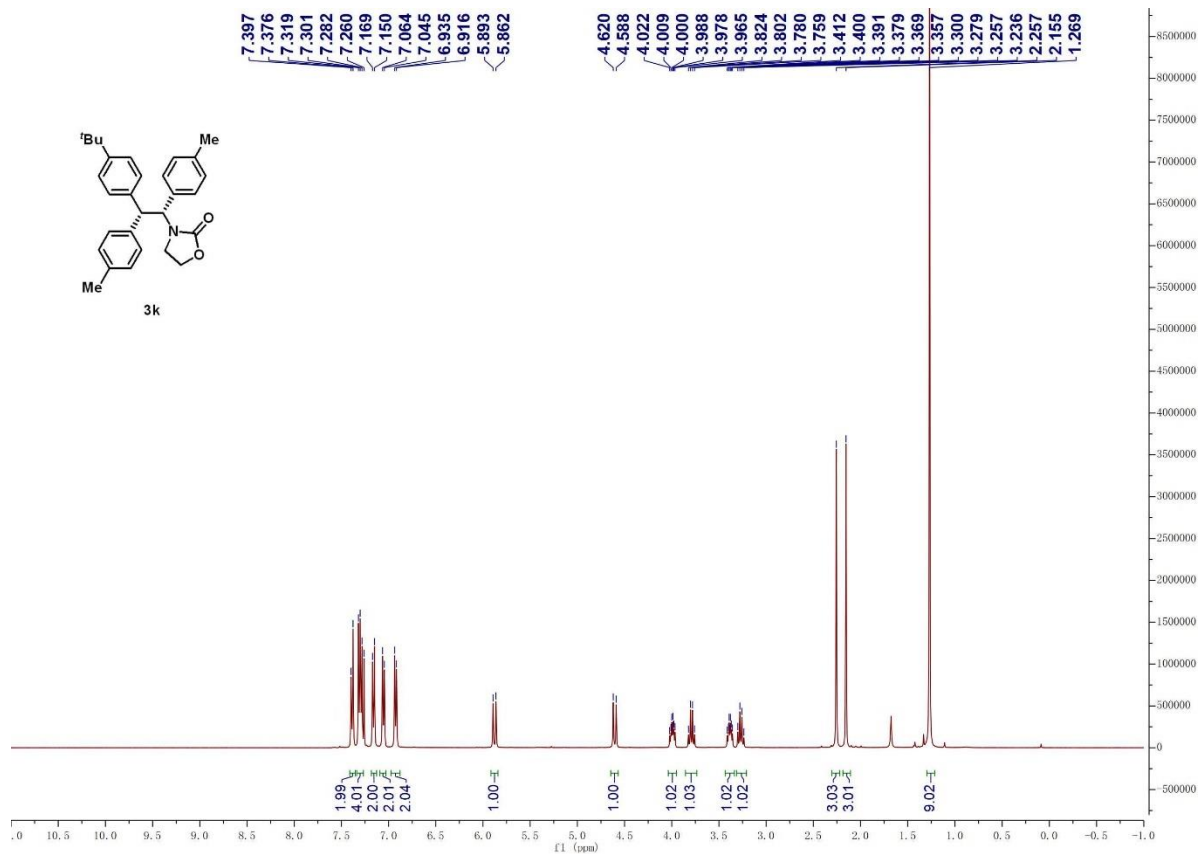

**<sup>13</sup>C NMR-spectrum (100 MHz, CDCl<sub>3</sub>) of 3k**

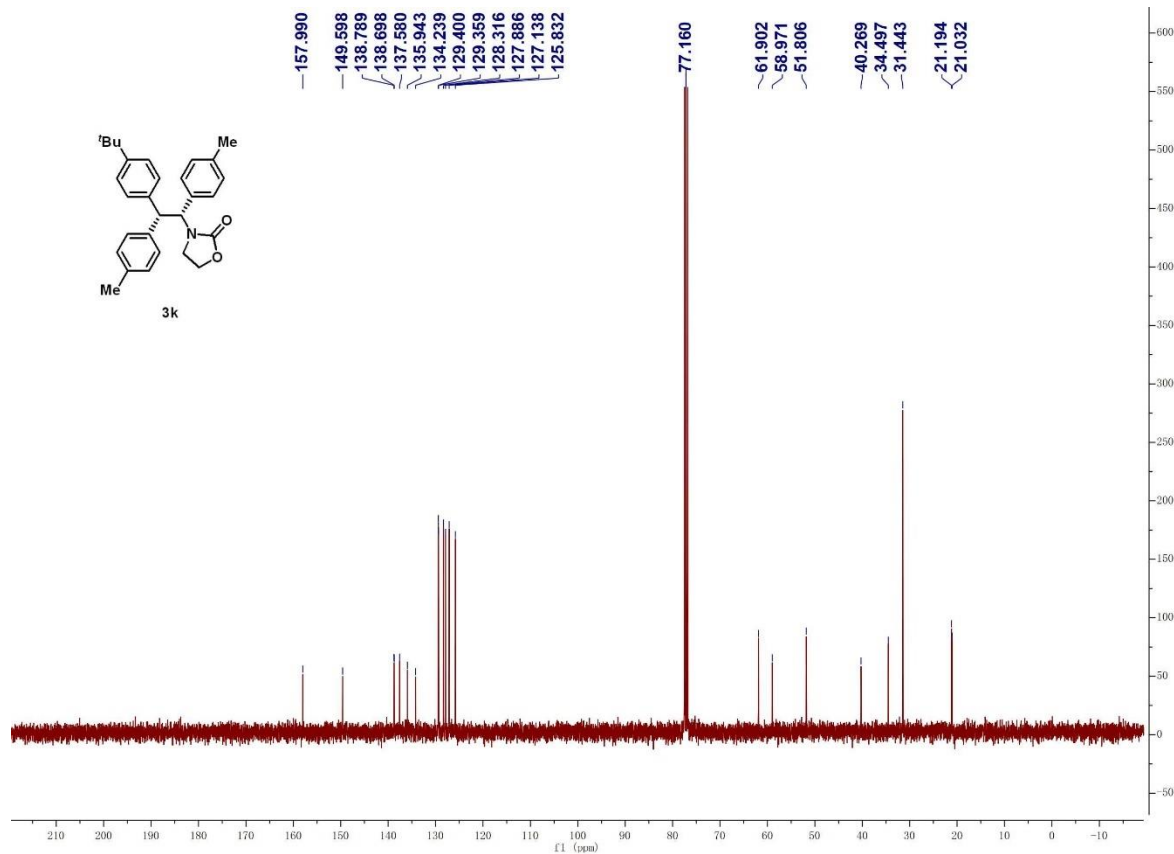



### $^1\text{H}$ NMR-spectrum (400 MHz, $\text{CDCl}_3$ ) of **31**

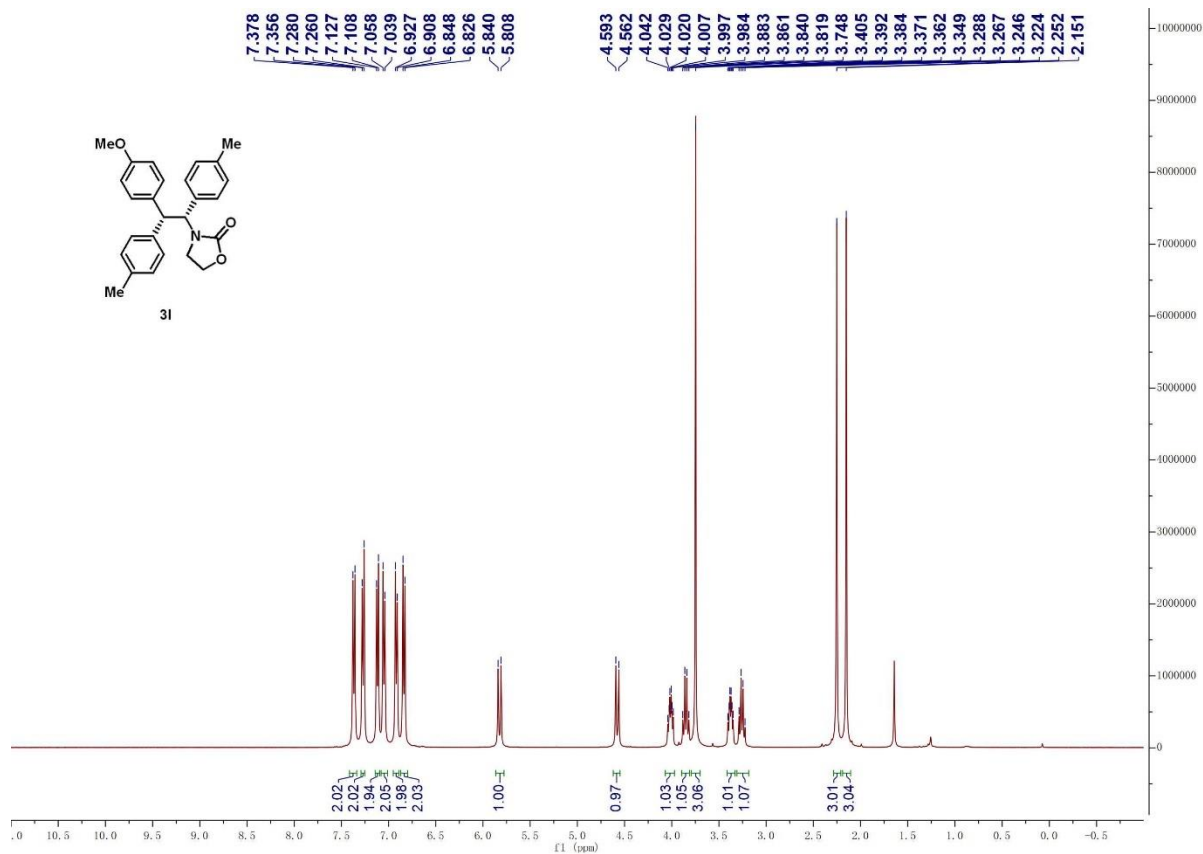

### $^{13}\text{C}$ NMR-spectrum (100 MHz, $\text{CDCl}_3$ ) of **31**

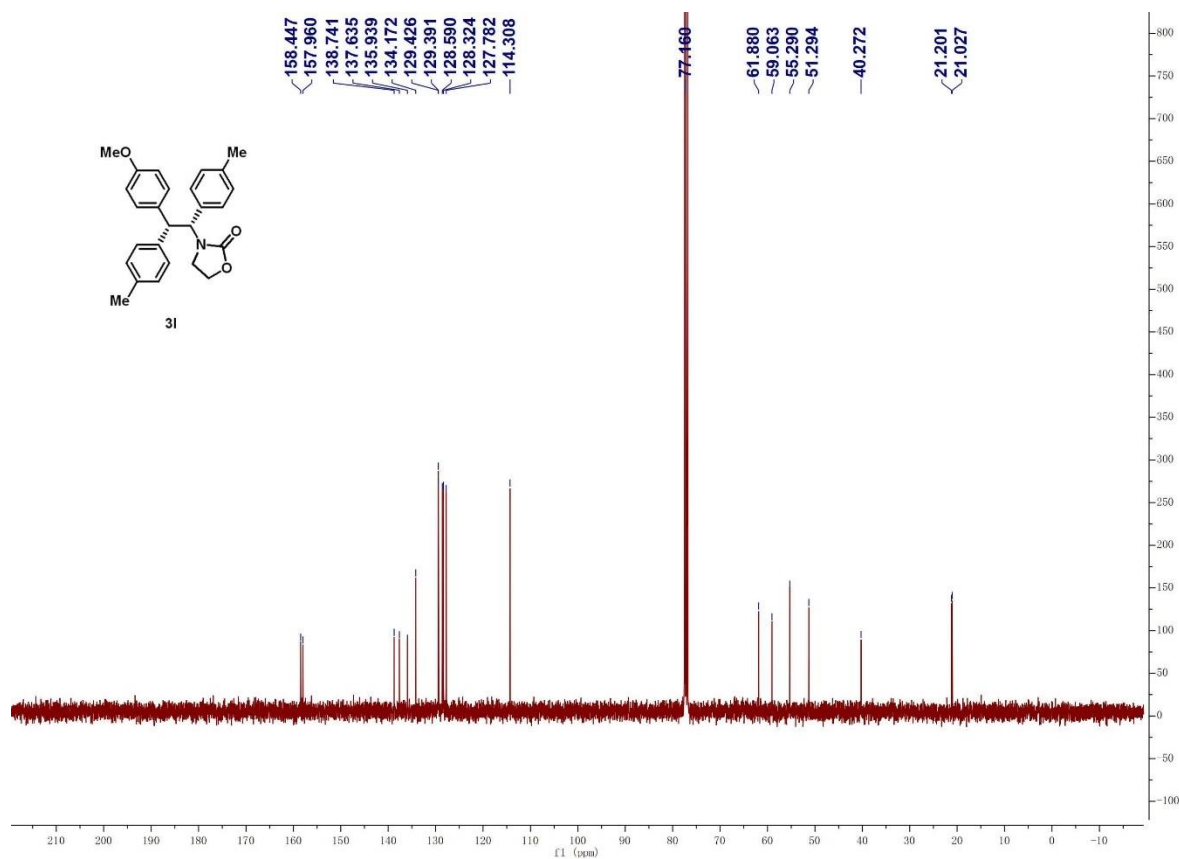

<sup>1</sup>H NMR-spectrum (400 MHz, CDCl<sub>3</sub>) of **3m**

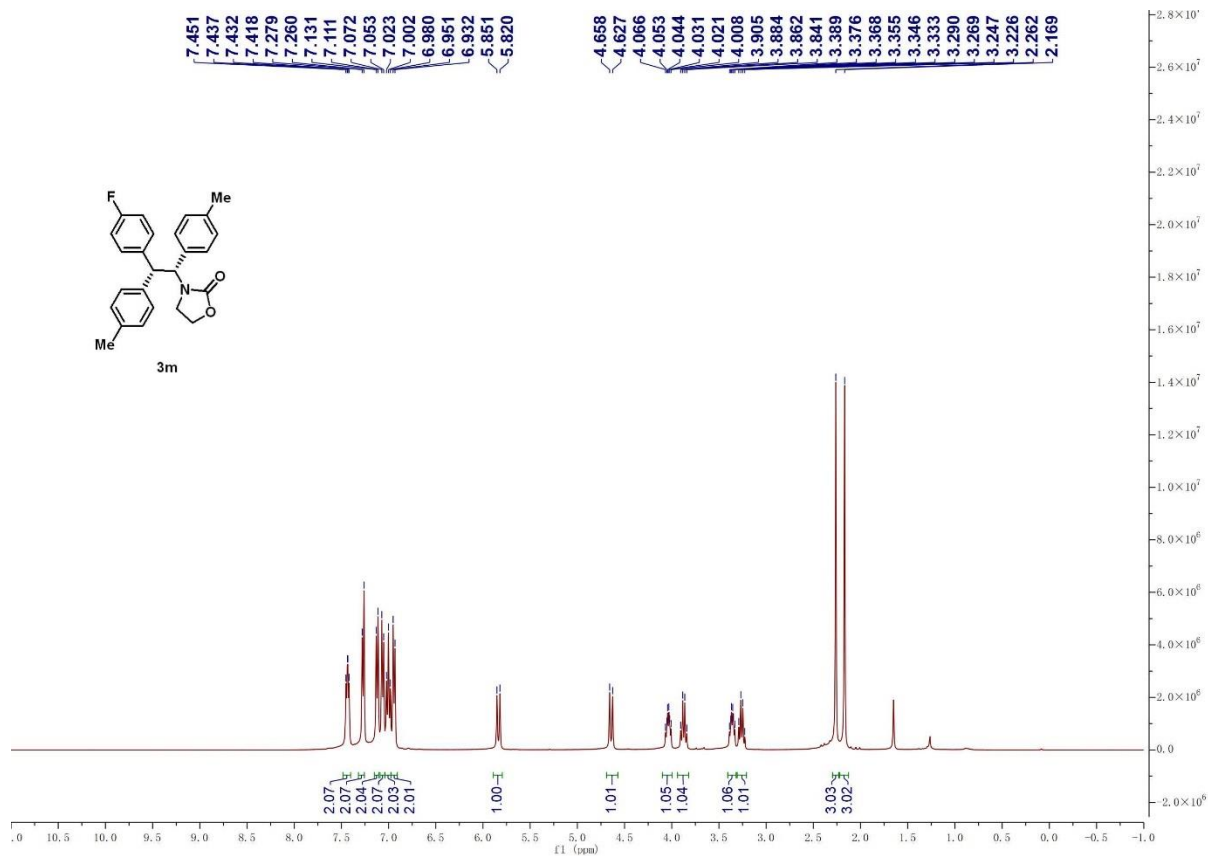

<sup>13</sup>C NMR-spectrum (100 MHz, CDCl<sub>3</sub>) of **3m**

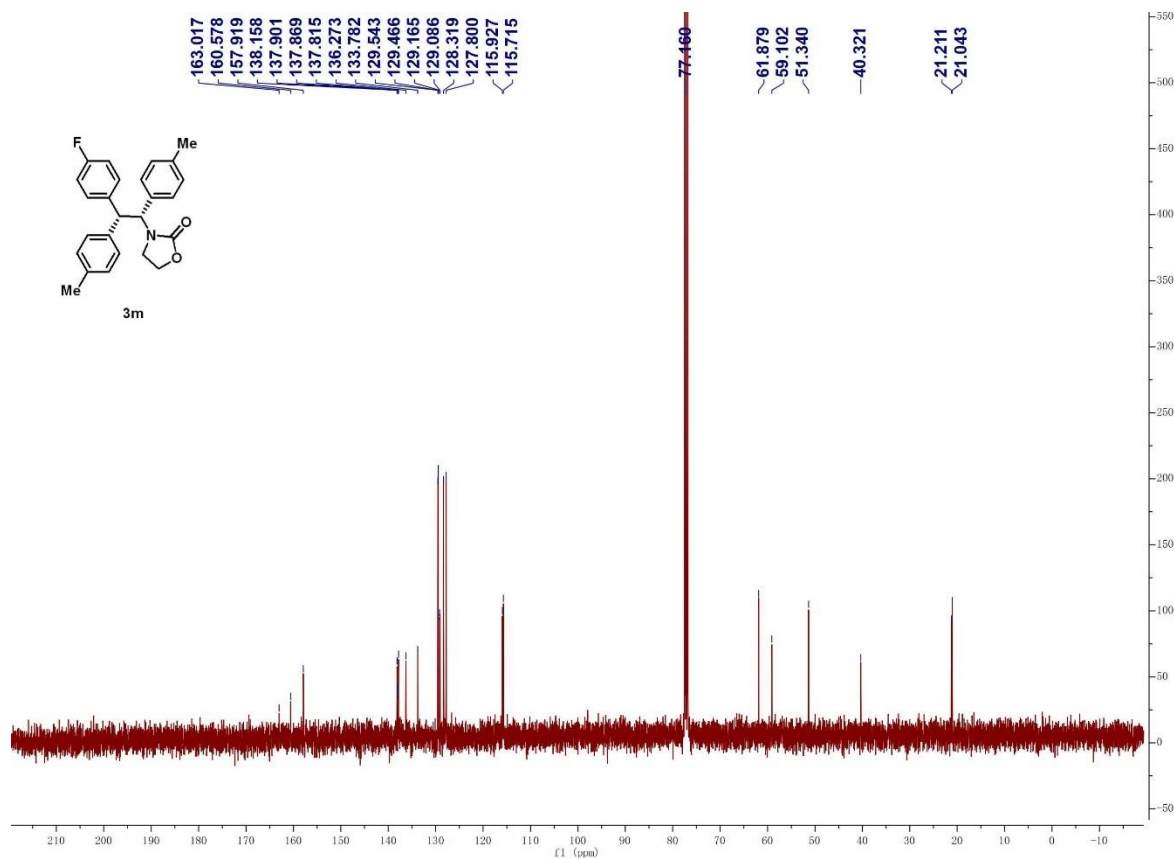



**$^{19}\text{F}$  NMR-spectrum (376 MHz,  $\text{CDCl}_3$ ) of **3m****

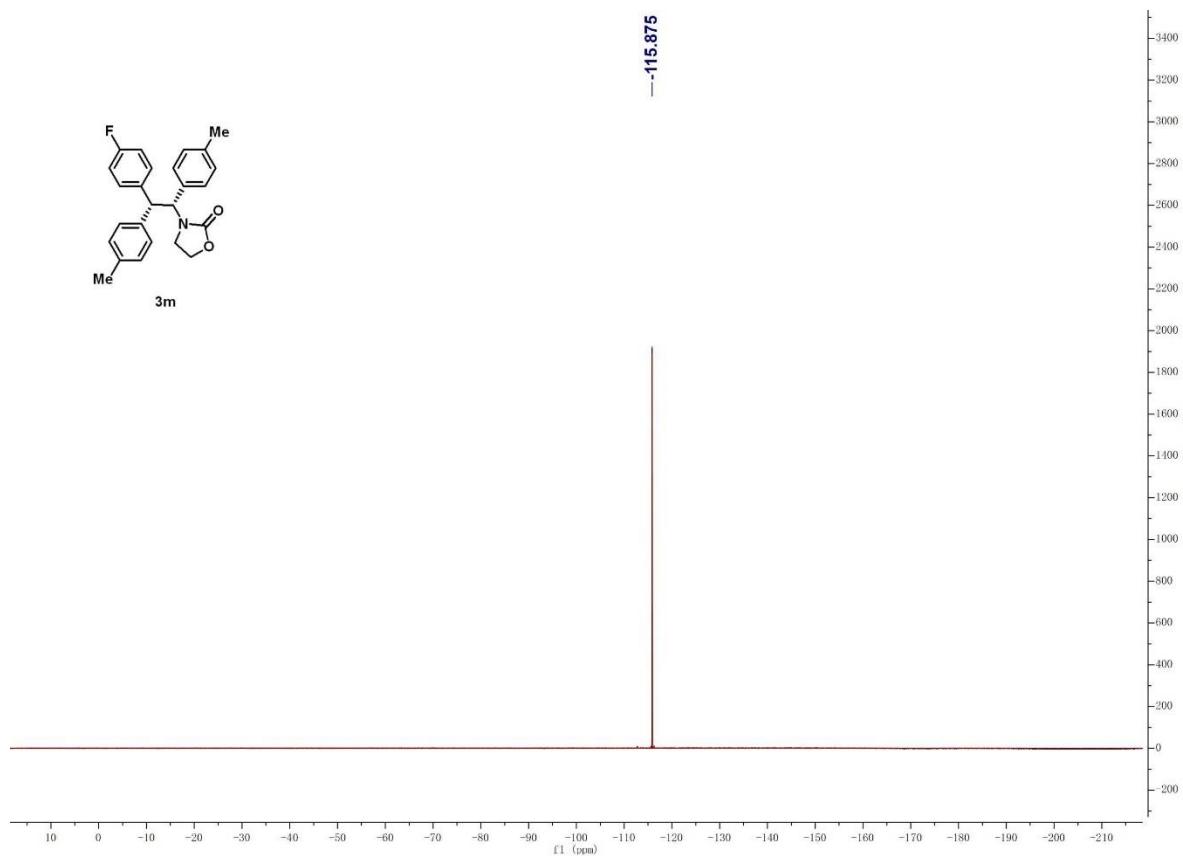

### $^1\text{H}$ NMR-spectrum (400 MHz, $\text{CDCl}_3$ ) of **3n**

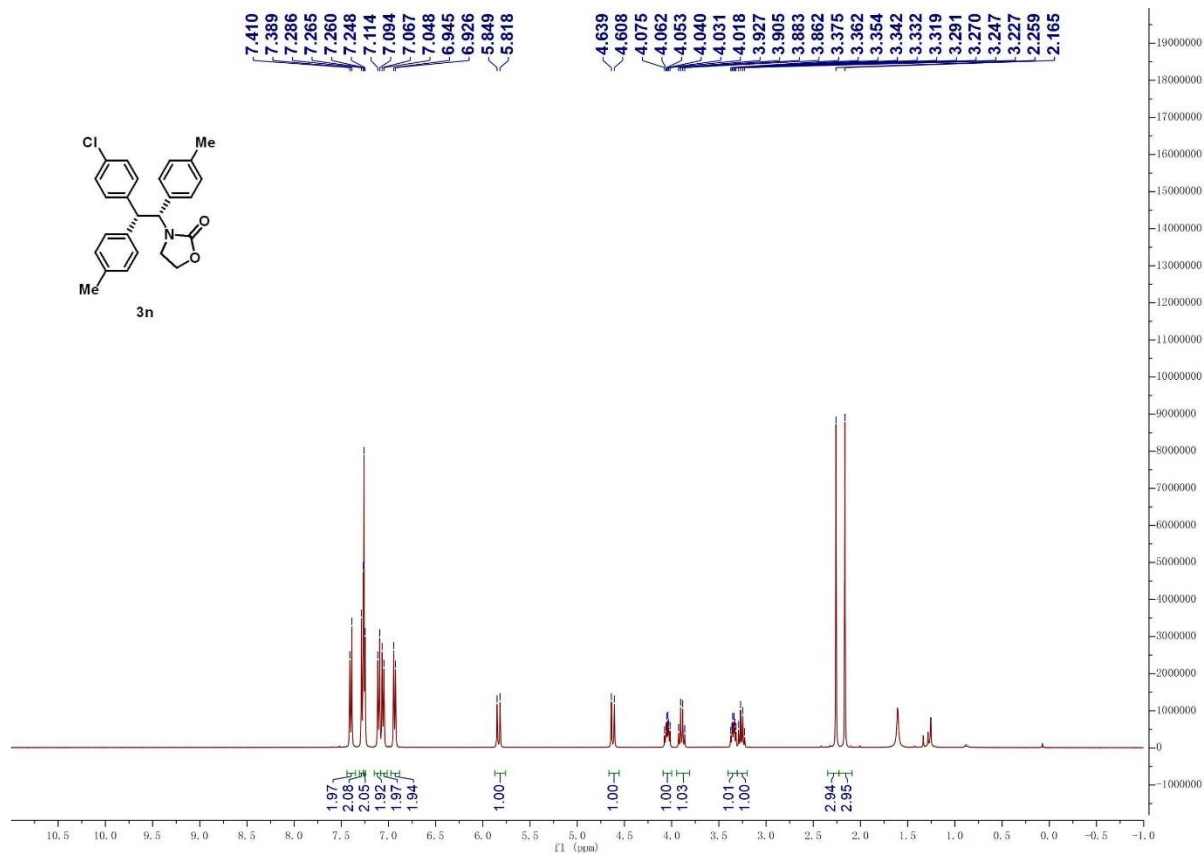

### $^{13}\text{C}$ NMR-spectrum (100 MHz, $\text{CDCl}_3$ ) of **3n**

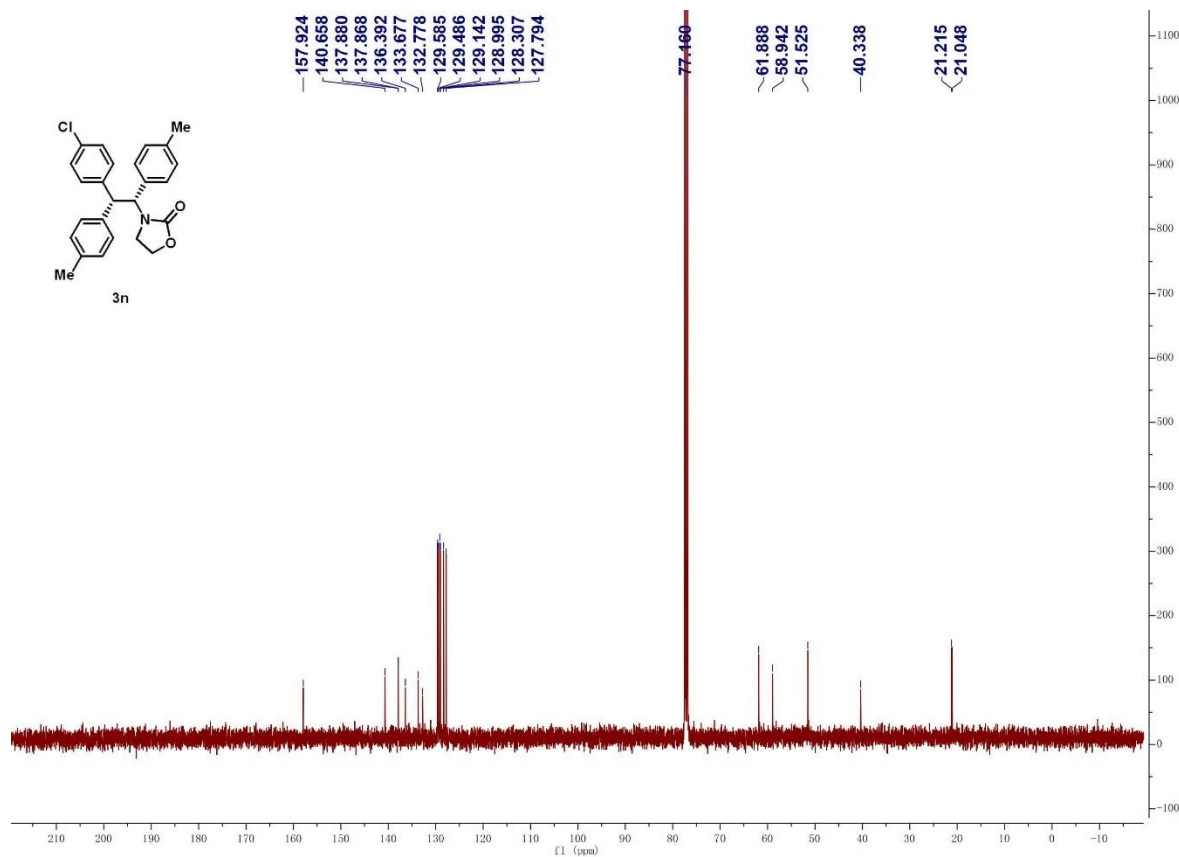

### $^1\text{H}$ NMR-spectrum (400 MHz, $\text{CDCl}_3$ ) of **3o**

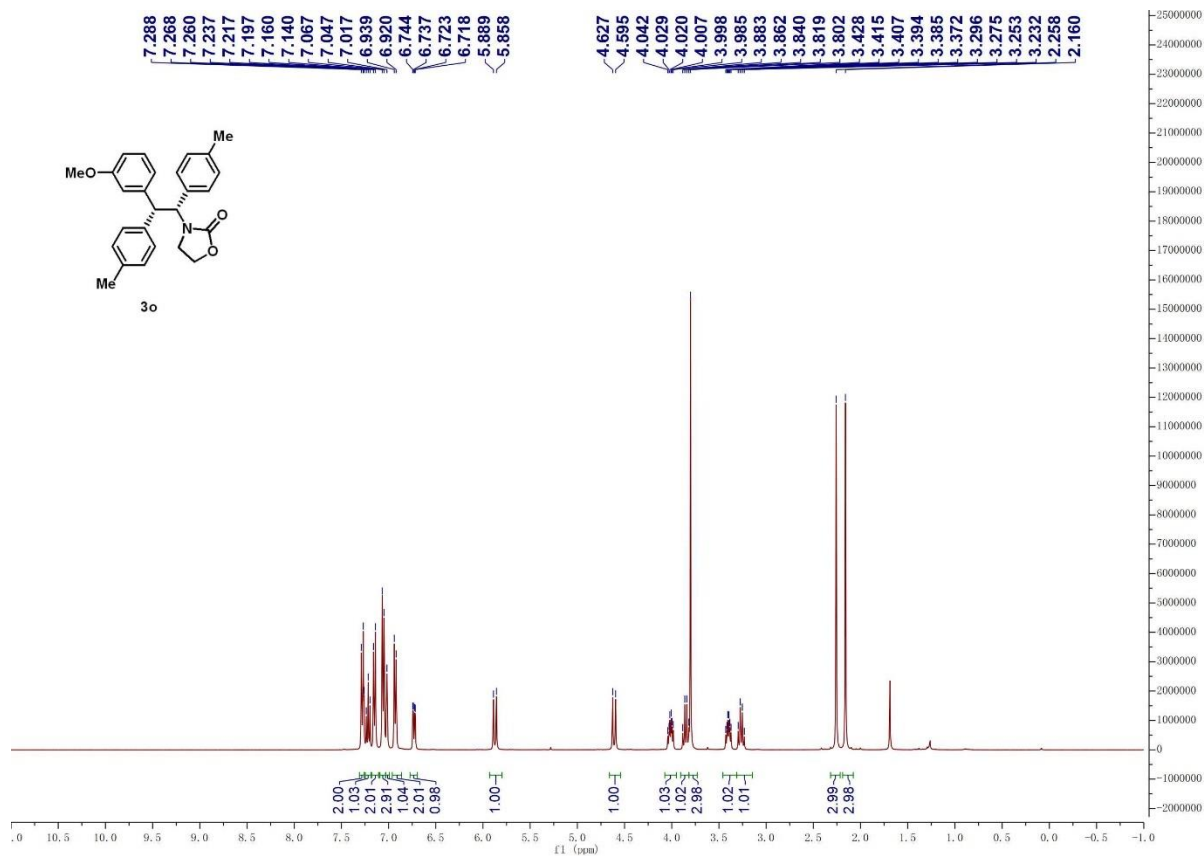

### $^{13}\text{C}$ NMR-spectrum (100 MHz, $\text{CDCl}_3$ ) of **3o**

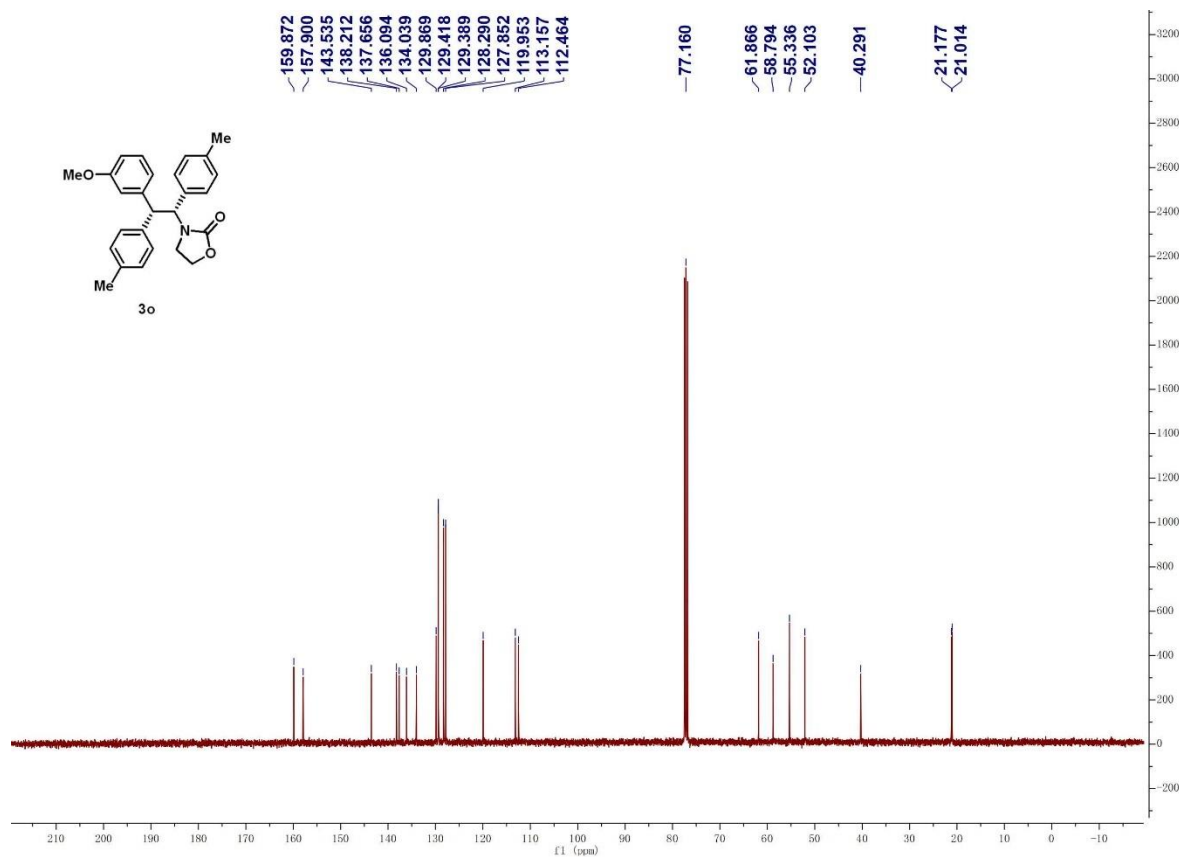

<sup>1</sup>H NMR-spectrum (400 MHz, CDCl<sub>3</sub>) of **3p**

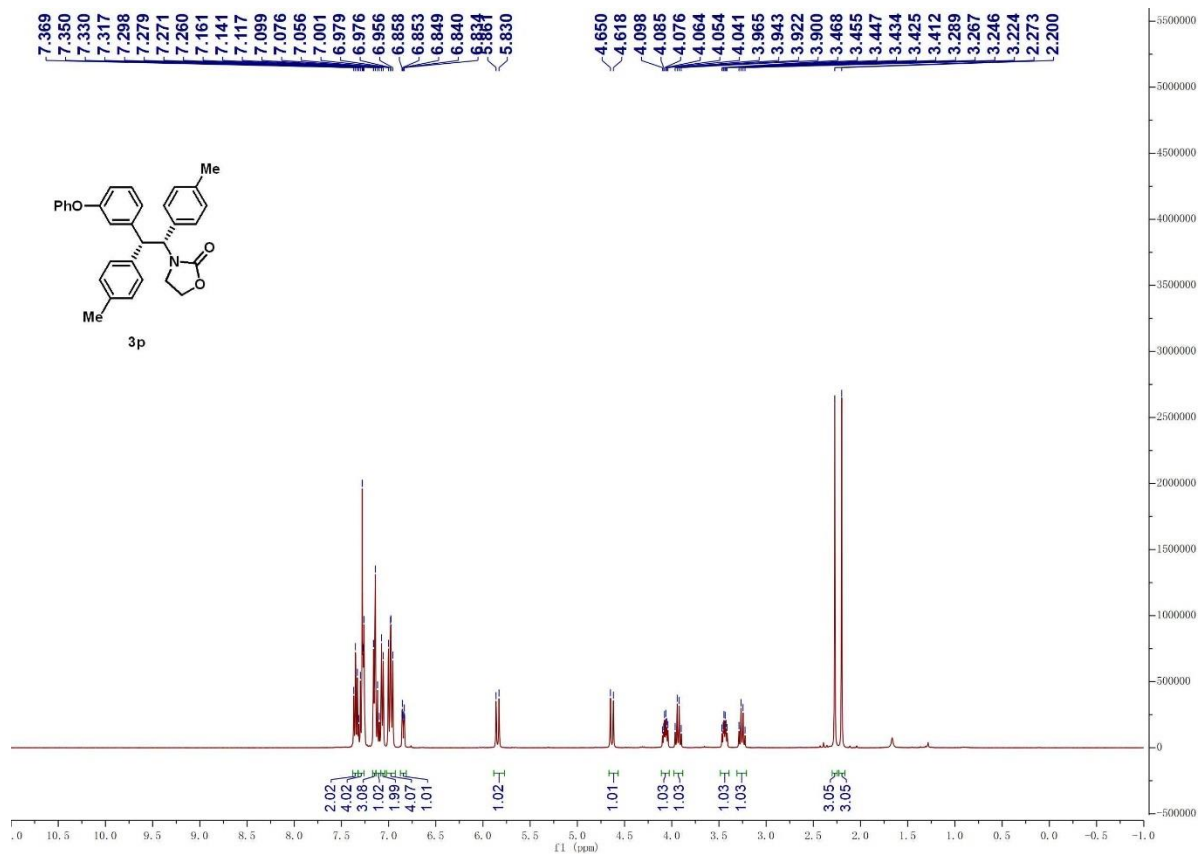

<sup>13</sup>C NMR-spectrum (100 MHz, CDCl<sub>3</sub>) of **3p**

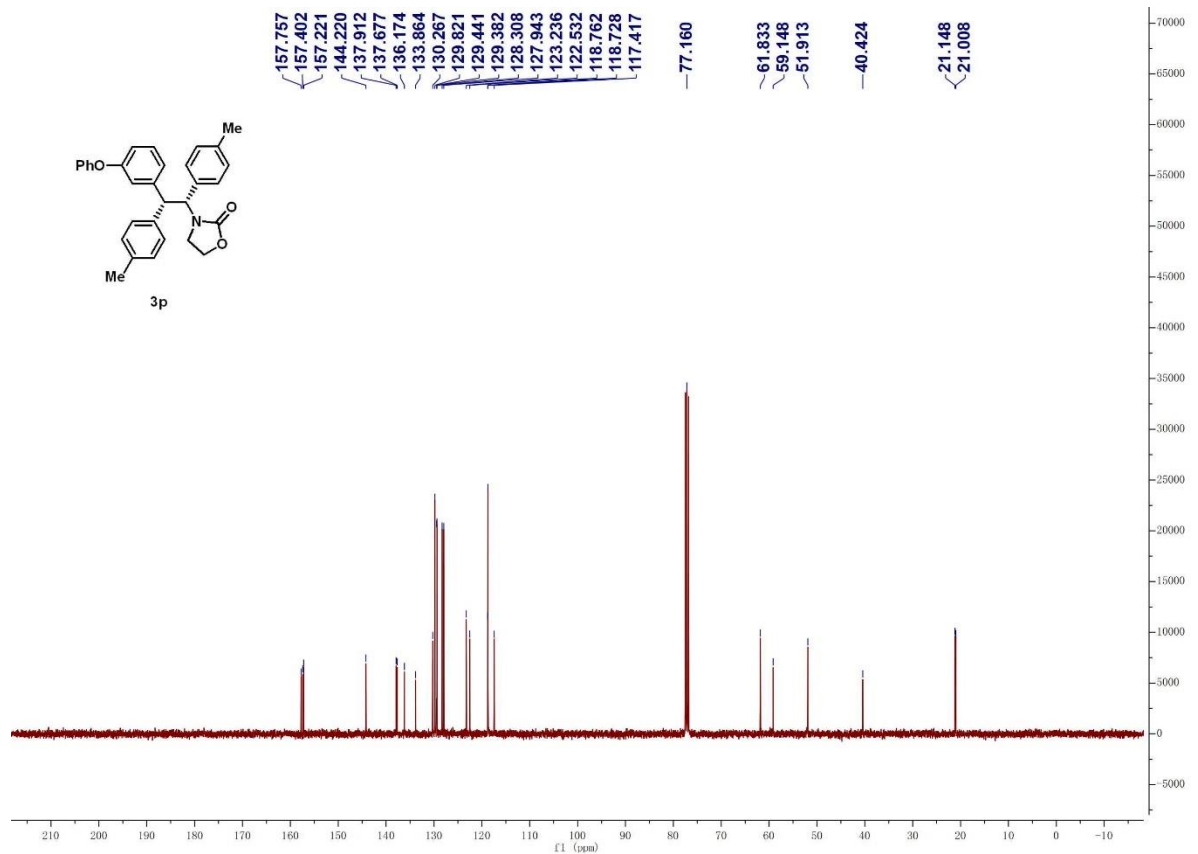

# <sup>1</sup>H NMR-spectrum (400 MHz, CDCl<sub>3</sub>) of **3q**

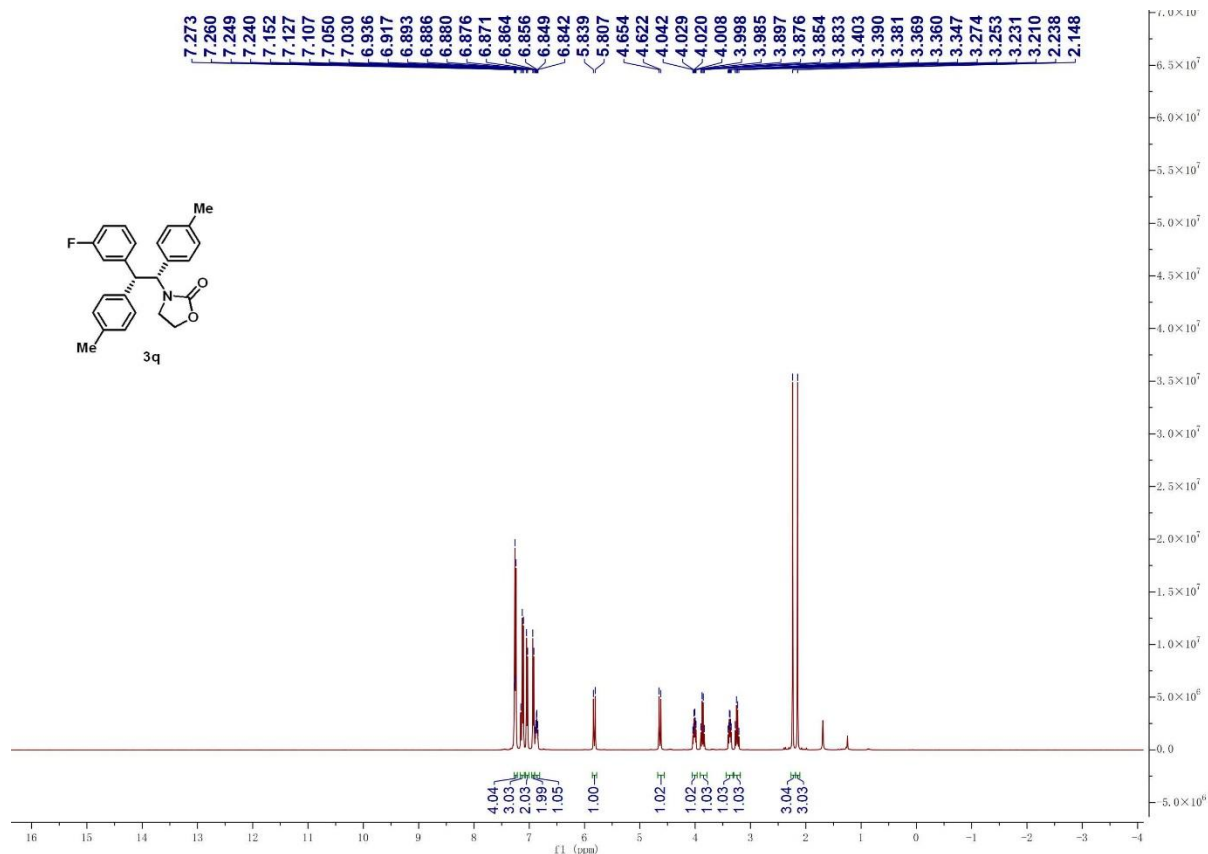

# <sup>13</sup>C NMR-spectrum (100 MHz, CDCl<sub>3</sub>) of **3q**

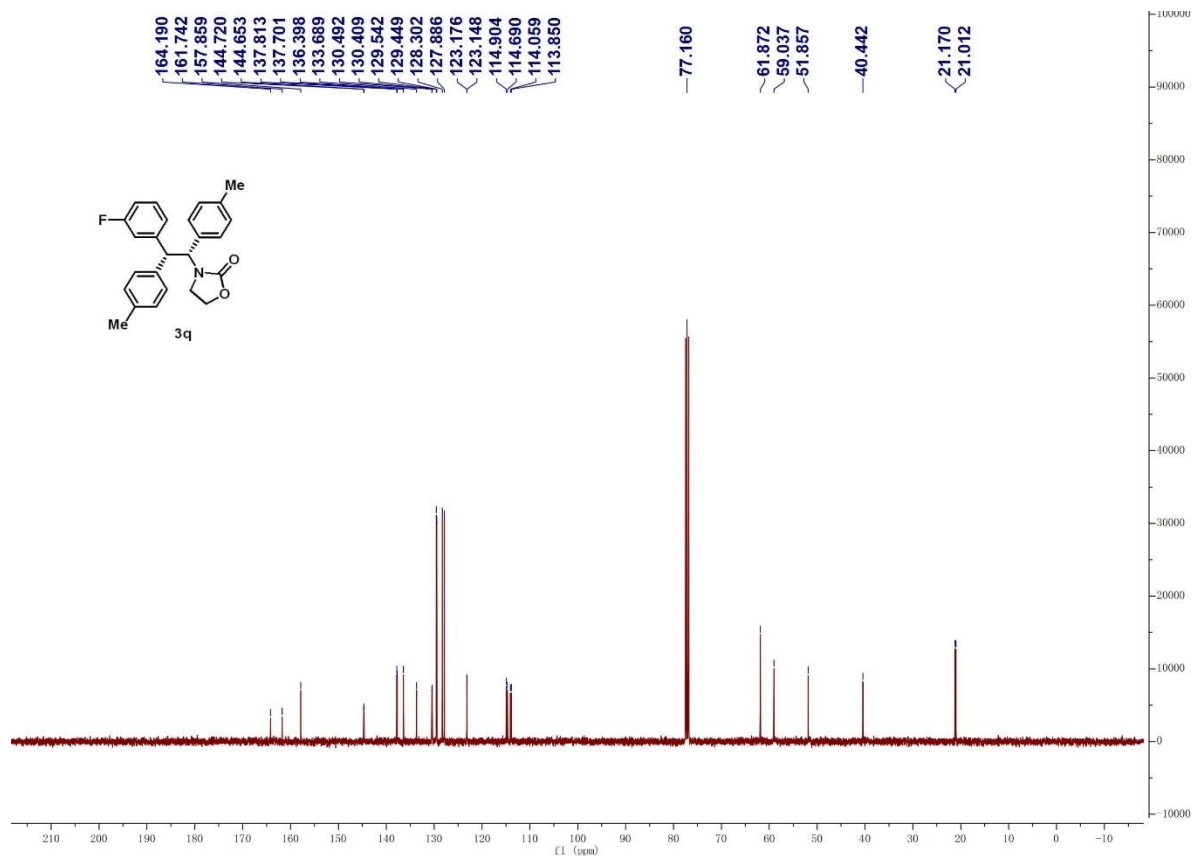

**$^{19}\text{F}$  NMR-spectrum (376 MHz,  $\text{CDCl}_3$ ) of **3q****

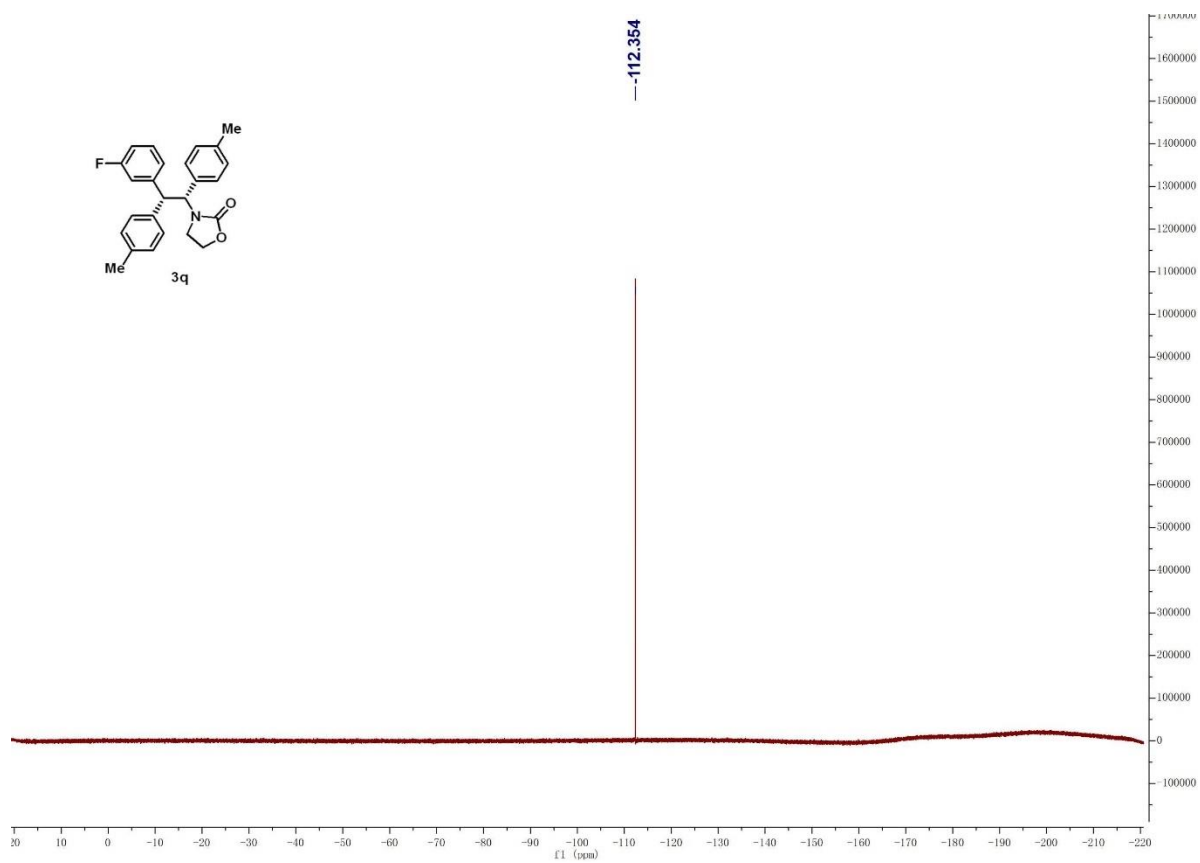

### $^1\text{H}$ NMR-spectrum (400 MHz, $\text{CDCl}_3$ ) of **3r**

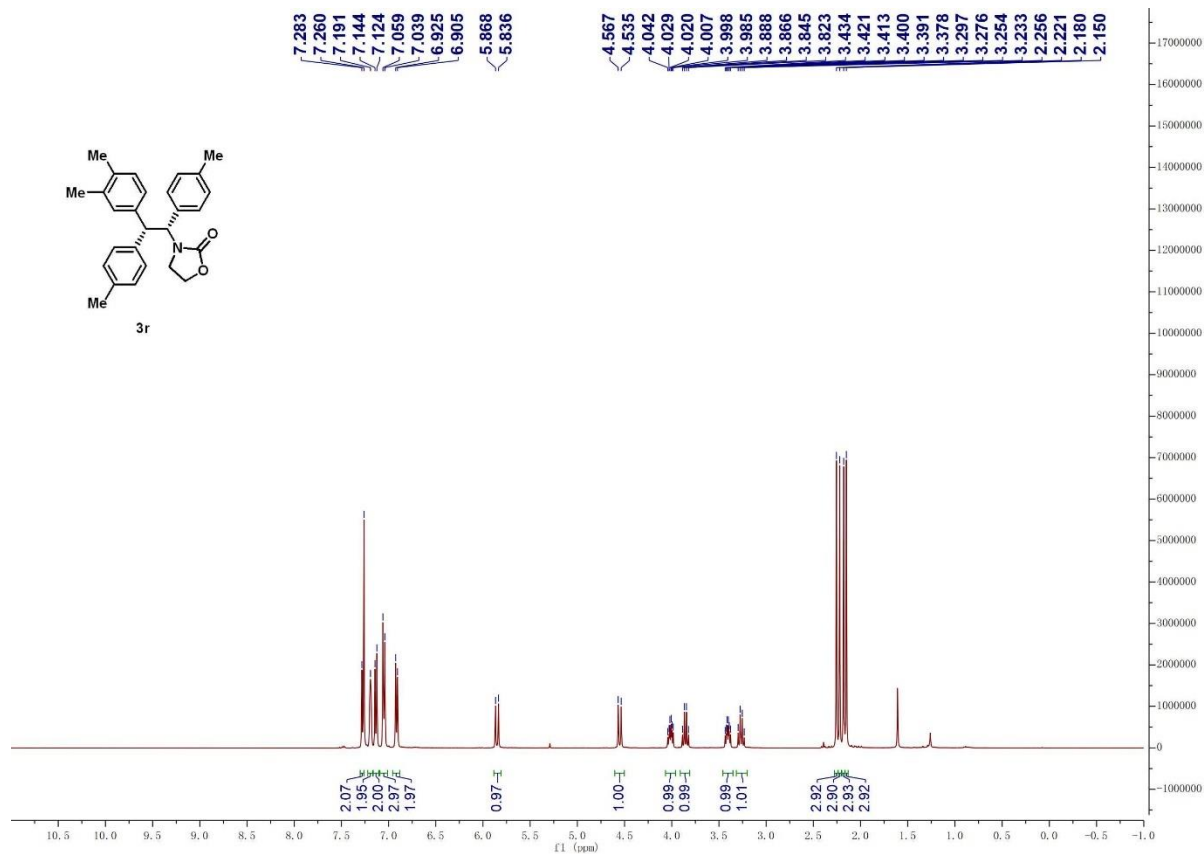

### $^{13}\text{C}$ NMR-spectrum (100 MHz, $\text{CDCl}_3$ ) of **3r**

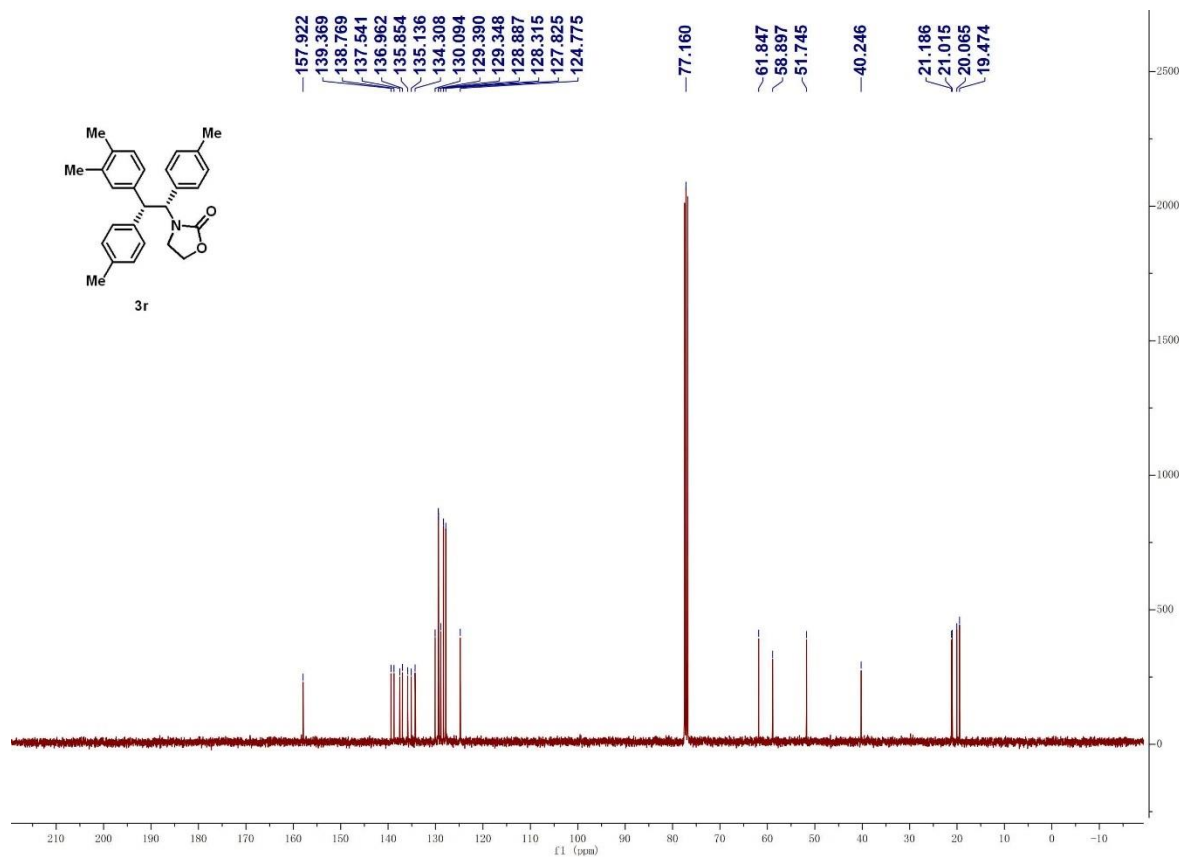

<sup>1</sup>H NMR-spectrum (400 MHz, CDCl<sub>3</sub>) of **3s**

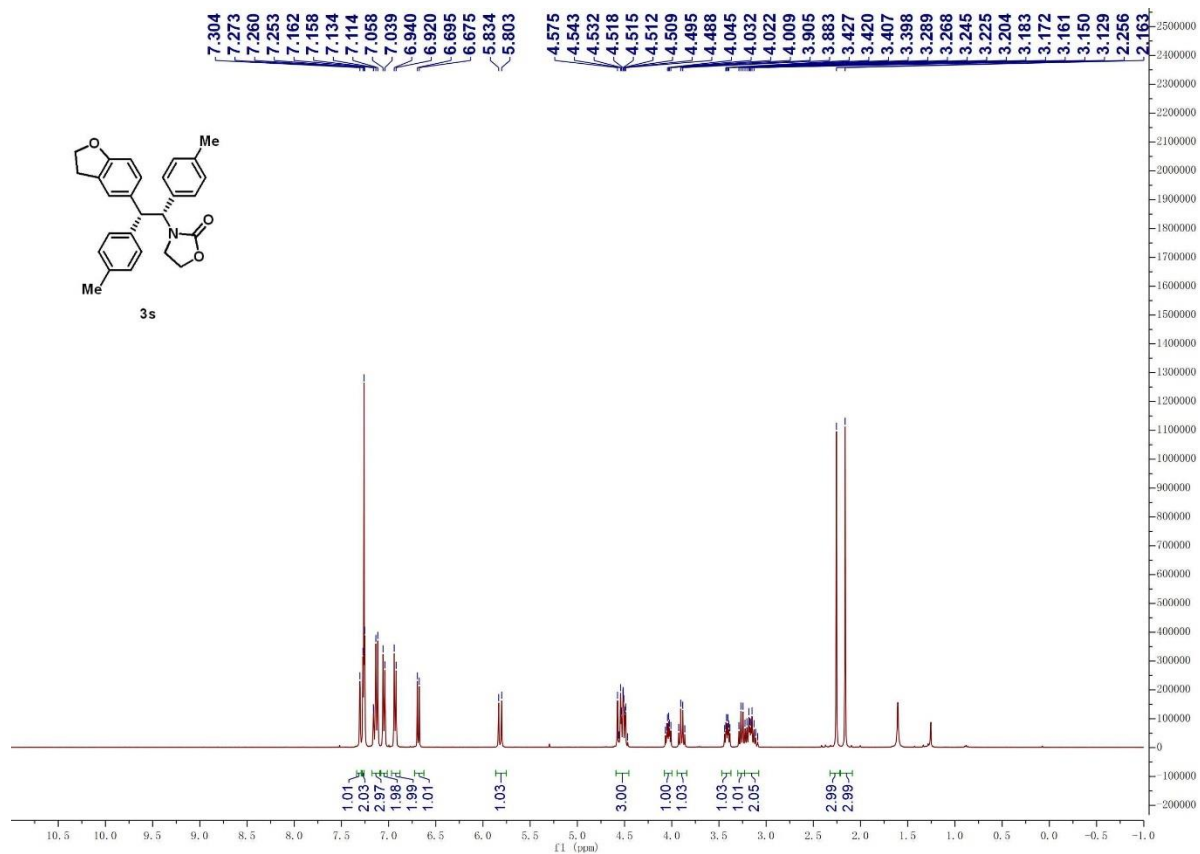

<sup>13</sup>C NMR-spectrum (100 MHz, CDCl<sub>3</sub>) of **3s**

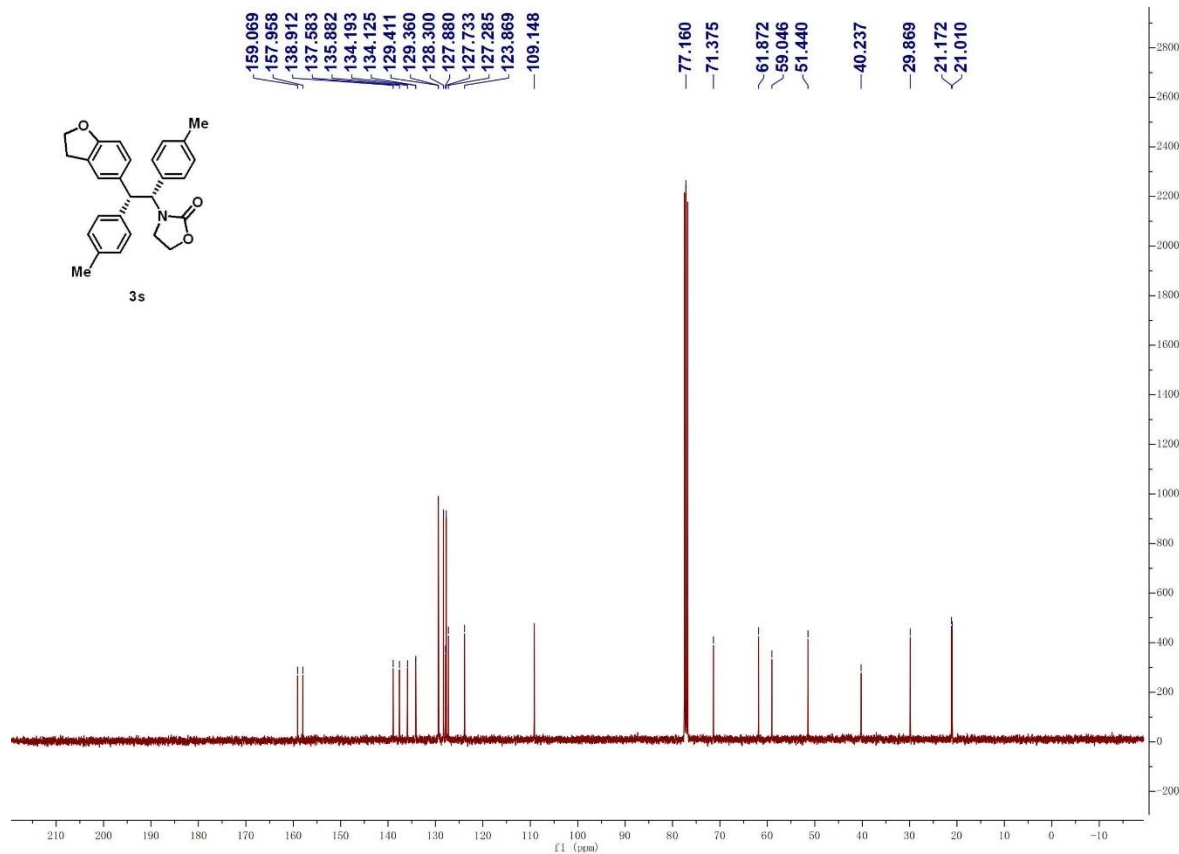



**<sup>1</sup>H NMR-spectrum (400 MHz, CDCl<sub>3</sub>) of 3t**

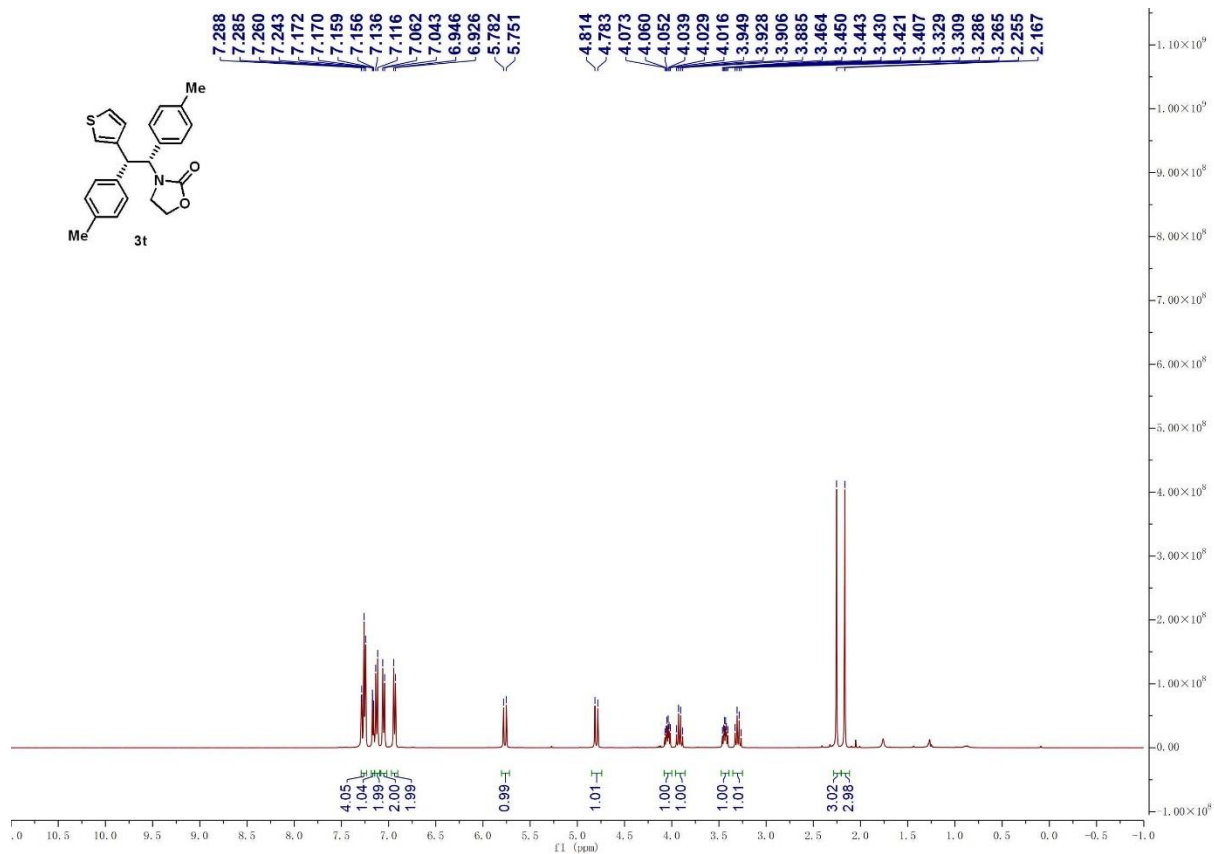

**<sup>13</sup>C NMR-spectrum (100 MHz, CDCl<sub>3</sub>) of 3t**

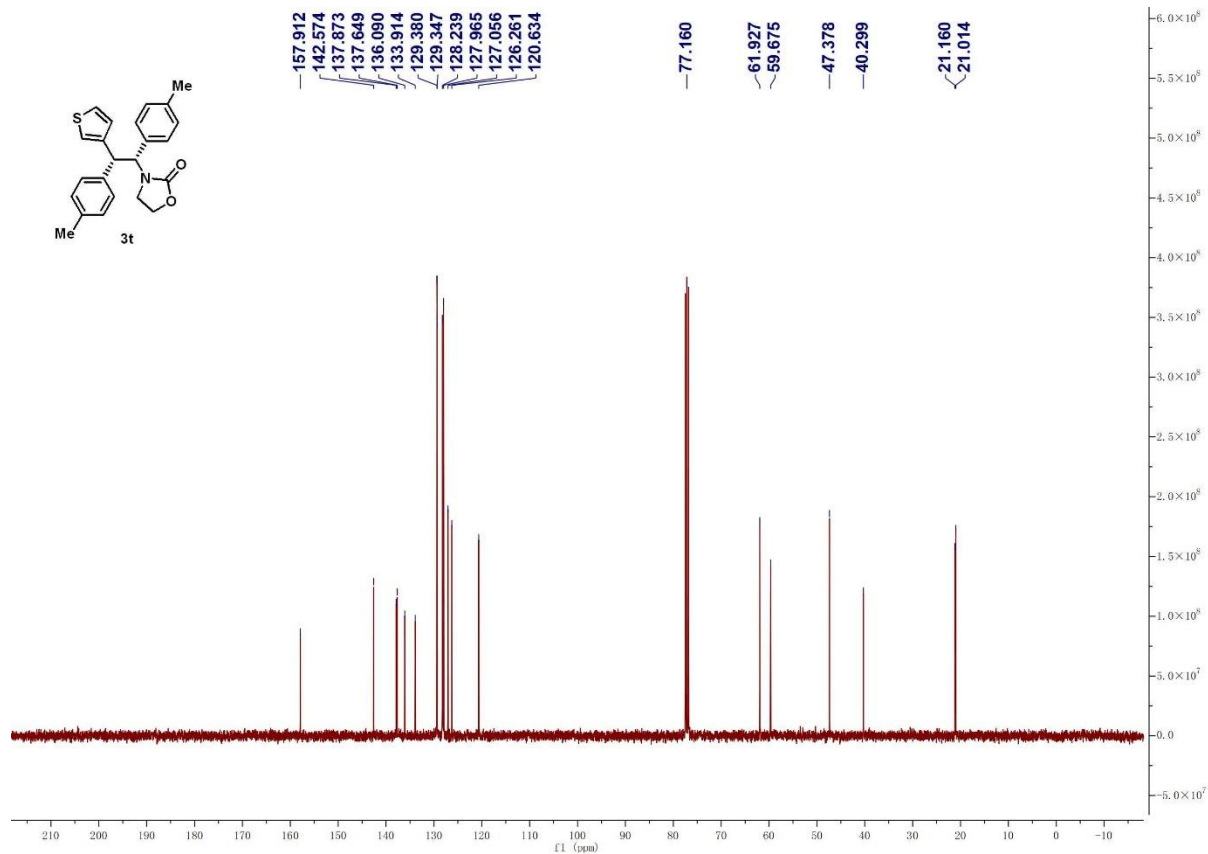

### <sup>1</sup>H NMR-spectrum (400 MHz, CDCl<sub>3</sub>) of **3u**

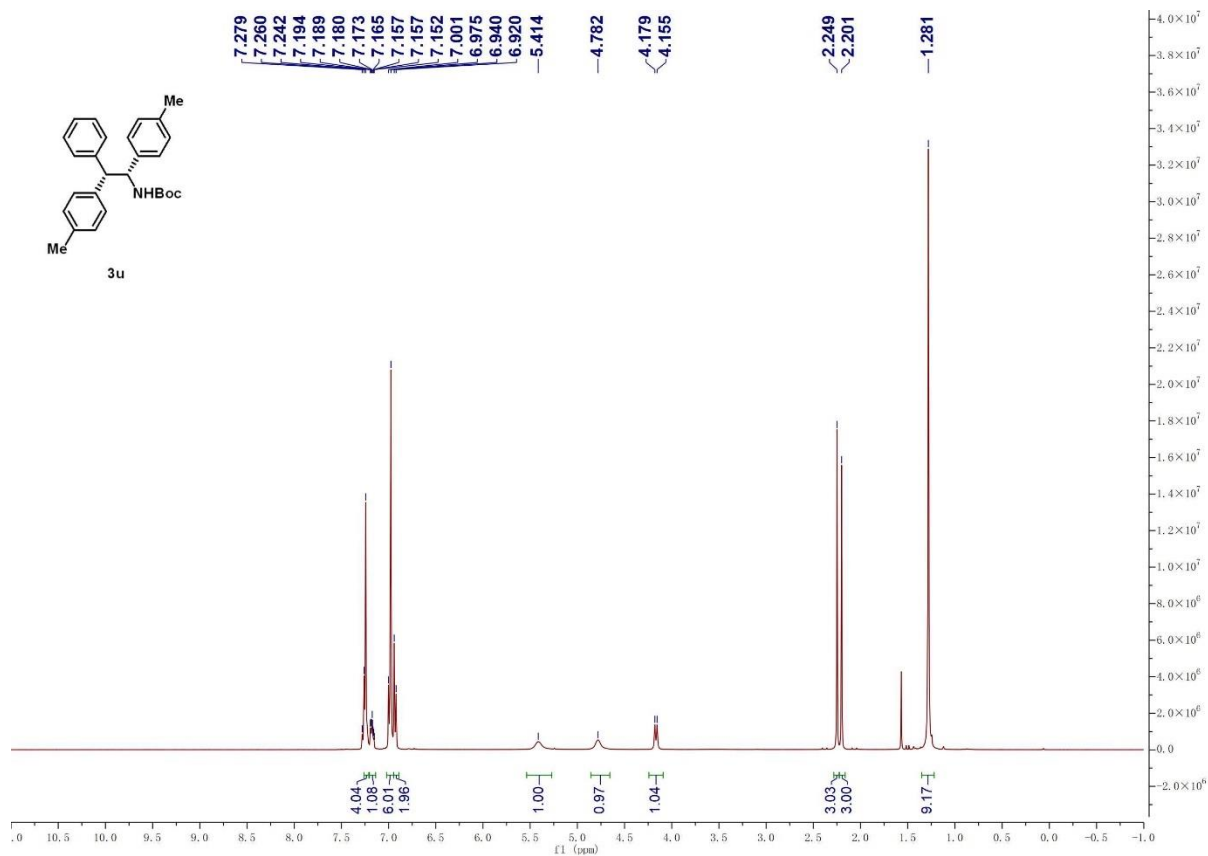

### <sup>13</sup>C NMR-spectrum (100 MHz, CDCl<sub>3</sub>) of **3u**

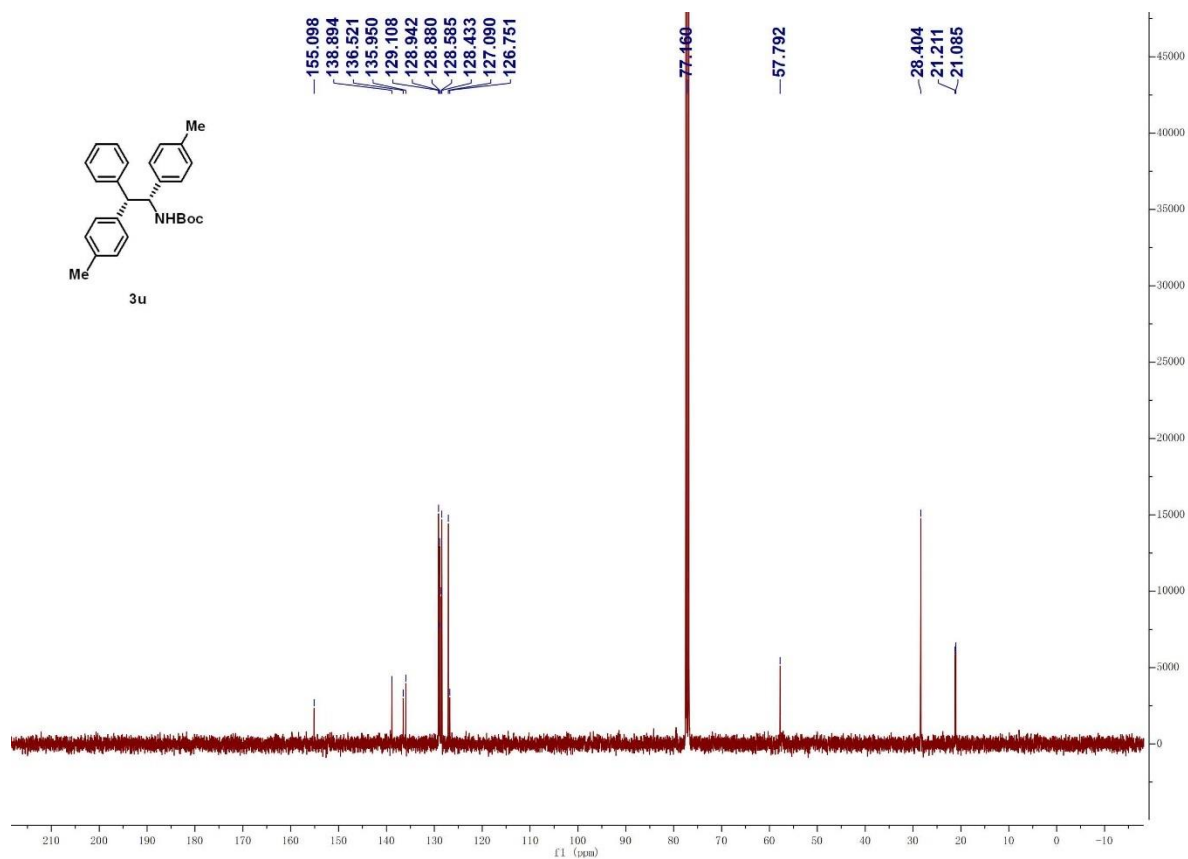

### $^1\text{H}$ NMR-spectrum (400 MHz, $\text{CDCl}_3$ ) of **3v**

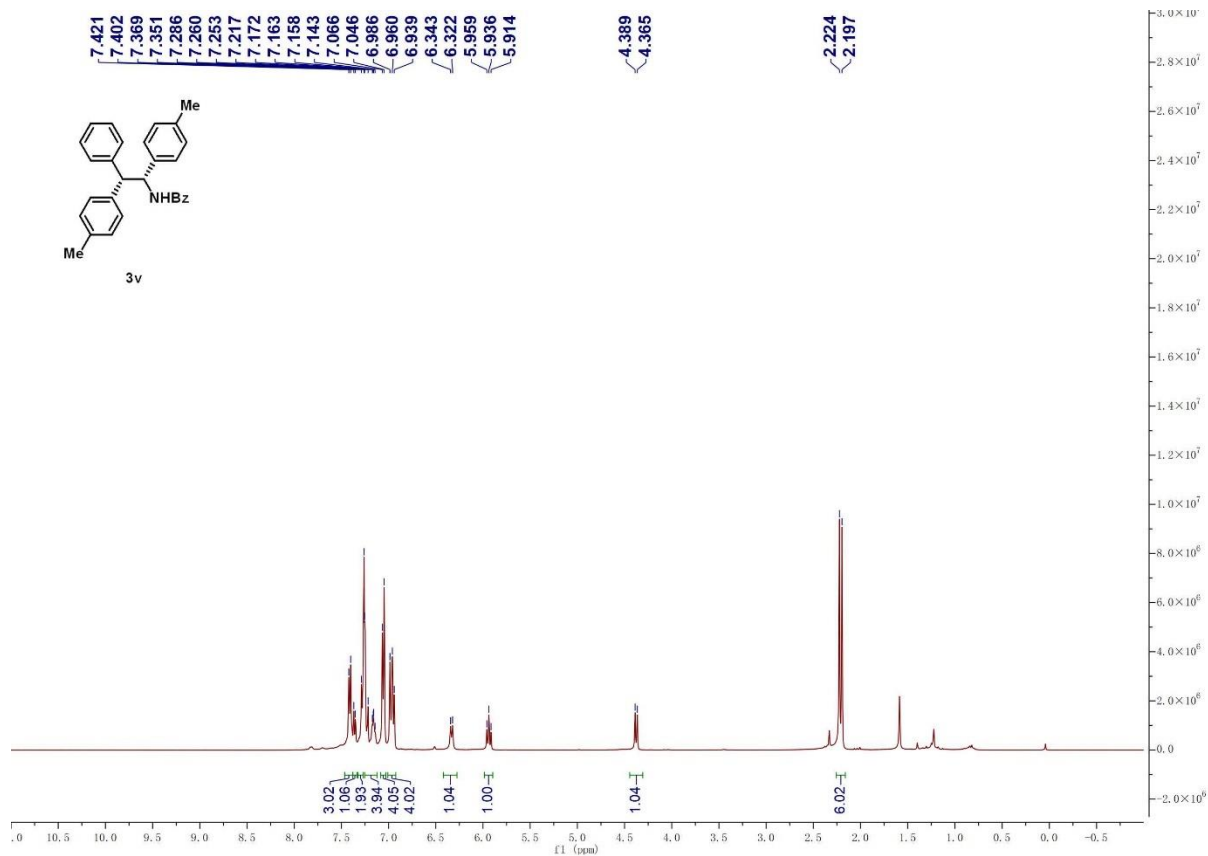

### $^{13}\text{C}$ NMR-spectrum (100 MHz, $\text{CDCl}_3$ ) of **3v**

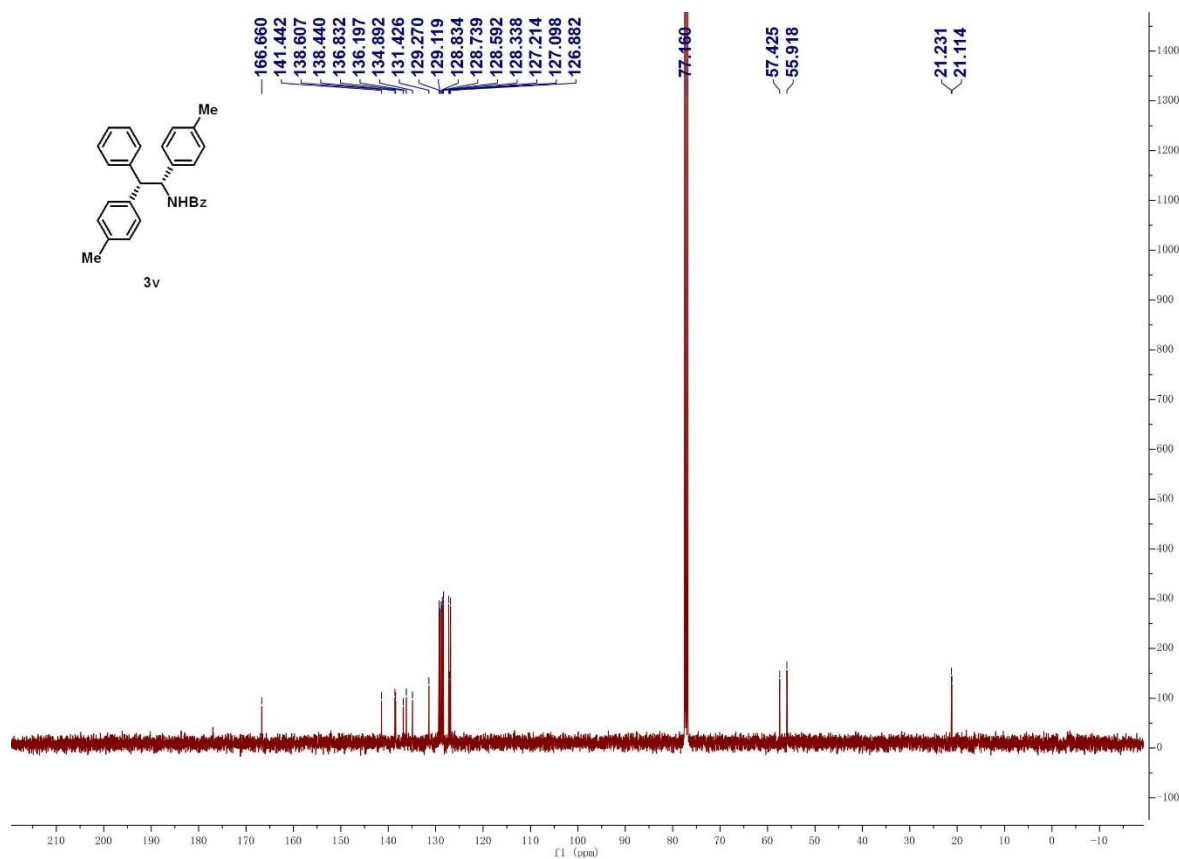

Supplement: d2cc03202c1.pdf [file d2cc03202c1.pdf]
